# Supplementary material
Source: publisher site journal article supplement (https://www.dovepress.com/article/433755)
Supplement: Supplementary file 1 [file get_supplementary_file.php]

Table S1

| MOL001494 | Mandenol |
| --- | --- |
| MOL002883 | Ethyl oleate (NF) |
| MOL003479 | cycloartenol acetate |
| MOL003485 | Phthalic acid, isobutyl undecyl ester |
| MOL000358 | beta-sitosterol |
| MOL001792 | DFV |
| MOL002714 | baicalein |
| MOL002959 | 3'-Methoxydaidzein |
| MOL000359 | sitosterol |
| MOL003889 | methylprotodioscin_qt |
| MOL004941 | (2R)-7-hydroxy-2-(4-hydroxyphenyl)chroman-4-one |
| MOL000546 | diosgenin |
| MOL006331 | 4',5-Dihydroxyflavone |
| MOL009760 | sibiricoside A_qt |
| MOL009763 | (+)-Syringaresinol-O-beta-D-glucoside |
| MOL009766 | zhonghualiaoine 1 |
| MOL001689 | acacetin |
| MOL000173 | wogonin |
| MOL000228 | (2R)-7-hydroxy-5-methoxy-2-phenylchroman-4-one |
| MOL002908 | 5,8,2'-Trihydroxy-7-methoxyflavone |
| MOL002909 | 5,7,2,5-tetrahydroxy-8,6-dimethoxyflavone |
| MOL002910 | Carthamidin |
| MOL002911 | 2,6,2',4'-tetrahydroxy-6'-methoxychaleone |
| MOL002913 | Dihydrobaicalin_qt |
| MOL002914 | Eriodyctiol (flavanone) |
| MOL002915 | Salvigenin |
| MOL002917 | 5,2',6'-Trihydroxy-7,8-dimethoxyflavone |
| MOL002925 | 5,7,2',6'-Tetrahydroxyflavone |
| MOL002926 | dihydrooroxylin A |
| MOL002927 | Skullcapflavone II |
| MOL002928 | oroxylin a |
| MOL002932 | Panicolin |
| MOL002933 | 5,7,4'-Trihydroxy-8-methoxyflavone |
| MOL002934 | NEOBAICALEIN |
| MOL002937 | DIHYDROOROXYLIN |
| MOL000525 | Norwogonin |
| MOL000552 | 5,2'-Dihydroxy-6,7,8-trimethoxyflavone |
| MOL000073 | ent-Epicatechin |
| MOL000449 | Stigmasterol |
| MOL001458 | coptisine |
| MOL001490 | bis[(2S)-2-ethylhexyl] benzene-1,2-dicarboxylate |
| MOL001506 | Supraene |
| MOL002879 | Diop |
| MOL002897 | epiberberine |
| MOL008206 | Moslosooflavone |
| MOL010415 | 11,13-Eicosadienoic acid, methyl ester |
| MOL012245 | 5,7,4'-trihydroxy-6-methoxyflavanone |
| MOL012246 | 5,7,4'-trihydroxy-8-methoxyflavanone |
| MOL012266 | rivularin |
| MOL003281 | 20(S)-dammar-24-ene-3β,20-diol-3-acetate |
| MOL003283 | (2R,3R,4S)-4-(4-hydroxy-3-methoxy-phenyl)-7-methoxy-2,3-dimethylol-tetralin-6-ol |
| MOL003290 | (3R,4R)-3,4-bis[(3,4-dimethoxyphenyl)methyl]oxolan-2-one |
| MOL003295 | (+)-pinoresinol monomethyl ether |
| MOL003305 | PHILLYRIN |
| MOL003306 | ACon1_001697 |
| MOL003308 | (+)-pinoresinol monomethyl ether-4-D-beta-glucoside_qt |
| MOL003315 | 3beta-Acetyl-20,25-epoxydammarane-24alpha-ol |
| MOL000211 | Mairin |
| MOL003322 | FORSYTHINOL |
| MOL003330 | (-)-Phillygenin |
| MOL003344 | β-amyrin acetate |
| MOL003347 | hyperforin |
| MOL003348 | adhyperforin |
| MOL003365 | Lactucasterol |
| MOL003370 | Onjixanthone I |
| MOL000422 | kaempferol |
| MOL000522 | arctiin |
| MOL000006 | luteolin |
| MOL000791 | bicuculline |
| MOL000098 | quercetin |
| MOL007326 | Cynarin(e) |
| MOL001002 | ellagic acid |
| MOL001918 | paeoniflorgenone |
| MOL001921 | Lactiflorin |
| MOL001924 | paeoniflorin |
| MOL001925 | paeoniflorin_qt |
| MOL002776 | Baicalin |
| MOL004355 | Spinasterol |
| MOL000492 | (+)-catechin |
| MOL006990 | (1S,2S,4R)-trans-2-hydroxy-1,8-cineole-B-D-glucopyranoside |
| MOL006992 | (2R,3R)-4-methoxyl-distylin |
| MOL006994 | 1-o-beta-d-glucopyranosyl-8-o-benzoylpaeonisuffrone_qt |
| MOL006996 | 1-o-beta-d-glucopyranosylpaeonisuffrone_qt |
| MOL006999 | stigmast-7-en-3-ol |
| MOL007003 | benzoyl paeoniflorin |
| MOL007004 | Albiflorin |
| MOL007005 | Albiflorin_qt |
| MOL007008 | 4-ethyl-paeoniflorin_qt |
| MOL007012 | 4-o-methyl-paeoniflorin_qt |
| MOL007014 | 8-debenzoylpaeonidanin |
| MOL007016 | Paeoniflorigenone |
| MOL007018 | 9-ethyl-neo-paeoniaflorin A_qt |
| MOL007022 | evofolinB |
| MOL007025 | isobenzoylpaeoniflorin |
| MOL005043 | campest-5-en-3beta-ol |
| MOL013381 | Marmin |
| MOL002341 | Hesperetin |
| MOL004328 | naringenin |
| MOL005828 | nobiletin |
| MOL001004 | pelargonidin |
| MOL004440 | Peimisine |
| MOL004443 | Zhebeiresinol |
| MOL004444 | Ziebeimine |
| MOL004446 | 6-Methoxyl-2-acetyl-3-methyl-1,4-naphthoquinone-8-O-beta-D-glucopyranoside |
| MOL004450 | Chaksine |
| MOL001484 | Inermine |
| MOL002311 | Glycyrol |
| MOL000239 | Jaranol |
| MOL002565 | Medicarpin |
| MOL000354 | isorhamnetin |
| MOL003656 | Lupiwighteone |
| MOL003896 | 7-Methoxy-2-methyl isoflavone |
| MOL000392 | formononetin |
| MOL000417 | Calycosin |
| MOL004805 | (2S)-2-[4-hydroxy-3-(3-methylbut-2-enyl)phenyl]-8,8-dimethyl-2,3-dihydropyrano[2,3-f]chromen-4-one |
| MOL004806 | euchrenone |
| MOL004808 | glyasperin B |
| MOL004810 | glyasperin F |
| MOL004811 | Glyasperin C |
| MOL004814 | Isotrifoliol |
| MOL004815 | (E)-1-(2,4-dihydroxyphenyl)-3-(2,2-dimethylchromen-6-yl)prop-2-en-1-one |
| MOL004820 | kanzonols W |
| MOL004824 | (2S)-6-(2,4-dihydroxyphenyl)-2-(2-hydroxypropan-2-yl)-4-methoxy-2,3-dihydrofuro[3,2-g]chromen-7-one |
| MOL004827 | Semilicoisoflavone B |
| MOL004828 | Glepidotin A |
| MOL004829 | Glepidotin B |
| MOL004833 | Phaseolinisoflavan |
| MOL004835 | Glypallichalcone |
| MOL004838 | 8-(6-hydroxy-2-benzofuranyl)-2,2-dimethyl-5-chromenol |
| MOL004841 | Licochalcone B |
| MOL004848 | licochalcone G |
| MOL004849 | 3-(2,4-dihydroxyphenyl)-8-(1,1-dimethylprop-2-enyl)-7-hydroxy-5-methoxy-coumarin |
| MOL004855 | Licoricone |
| MOL004856 | Gancaonin A |
| MOL004857 | Gancaonin B |
| MOL004860 | licorice glycoside E |
| MOL004863 | 3-(3,4-dihydroxyphenyl)-5,7-dihydroxy-8-(3-methylbut-2-enyl)chromone |
| MOL004864 | 5,7-dihydroxy-3-(4-methoxyphenyl)-8-(3-methylbut-2-enyl)chromone |
| MOL004866 | 2-(3,4-dihydroxyphenyl)-5,7-dihydroxy-6-(3-methylbut-2-enyl)chromone |
| MOL004879 | Glycyrin |
| MOL004882 | Licocoumarone |
| MOL004883 | Licoisoflavone |
| MOL004884 | Licoisoflavone B |
| MOL004885 | licoisoflavanone |
| MOL004891 | shinpterocarpin |
| MOL004898 | (E)-3-[3,4-dihydroxy-5-(3-methylbut-2-enyl)phenyl]-1-(2,4-dihydroxyphenyl)prop-2-en-1-one |
| MOL004903 | liquiritin |
| MOL004904 | licopyranocoumarin |
| MOL004905 | 3,22-Dihydroxy-11-oxo-delta(12)-oleanene-27-alpha-methoxycarbonyl-29-oic acid |
| MOL004907 | Glyzaglabrin |
| MOL004908 | Glabridin |
| MOL004910 | Glabranin |
| MOL004911 | Glabrene |
| MOL004912 | Glabrone |
| MOL004913 | 1,3-dihydroxy-9-methoxy-6-benzofurano[3,2-c]chromenone |
| MOL004914 | 1,3-dihydroxy-8,9-dimethoxy-6-benzofurano[3,2-c]chromenone |
| MOL004915 | Eurycarpin A |
| MOL004917 | glycyroside |
| MOL004924 | (-)-Medicocarpin |
| MOL004935 | Sigmoidin-B |
| MOL004945 | (2S)-7-hydroxy-2-(4-hydroxyphenyl)-8-(3-methylbut-2-enyl)chroman-4-one |
| MOL004948 | Isoglycyrol |
| MOL004949 | Isolicoflavonol |
| MOL004957 | HMO |
| MOL004959 | 1-Methoxyphaseollidin |
| MOL004961 | Quercetin der. |
| MOL004966 | 3'-Hydroxy-4'-O-Methylglabridin |
| MOL000497 | licochalcone a |
| MOL004974 | 3'-Methoxyglabridin |
| MOL004978 | 2-[(3R)-8,8-dimethyl-3,4-dihydro-2H-pyrano[6,5-f]chromen-3-yl]-5-methoxyphenol |
| MOL004980 | Inflacoumarin A |
| MOL004985 | icos-5-enoic acid |
| MOL004988 | Kanzonol F |
| MOL004989 | 6-prenylated eriodictyol |
| MOL004990 | 7,2',4'-trihydroxy－5-methoxy-3－arylcoumarin |
| MOL004991 | 7-Acetoxy-2-methylisoflavone |
| MOL004993 | 8-prenylated eriodictyol |
| MOL004996 | gadelaidic acid |
| MOL000500 | Vestitol |
| MOL005000 | Gancaonin G |
| MOL005001 | Gancaonin H |
| MOL005003 | Licoagrocarpin |
| MOL005007 | Glyasperins M |
| MOL005008 | Glycyrrhiza flavonol A |
| MOL005012 | Licoagroisoflavone |
| MOL005013 | 18α-hydroxyglycyrrhetic acid |
| MOL005016 | Odoratin |
| MOL005017 | Phaseol |
| MOL005018 | Xambioona |
| MOL005020 | dehydroglyasperins C |
| MOL003851 | Isoramanone |
| MOL004345 | 1-methyl-2-nonacosyl-4-quinolone |
| MOL004350 | Ruvoside_qt |
| MOL004351 | C09747 |

Table S2

| MolId | MolName | Target | Symbol |
| --- | --- | --- | --- |
| MOL001494 | Mandenol | Prostaglandin G/H synthase 1 | PTGS1 |
| MOL001494 | Mandenol | Nuclear receptor coactivator 2 | NCOA2 |
| MOL002883 | Ethyl oleate (NF) | Nuclear receptor coactivator 2 | NCOA2 |
| MOL000358 | beta-sitosterol | Progesterone receptor | PGR |
| MOL000358 | beta-sitosterol | Nuclear receptor coactivator 2 | NCOA2 |
| MOL000358 | beta-sitosterol | Prostaglandin G/H synthase 1 | PTGS1 |
| MOL000358 | beta-sitosterol | Heat shock protein HSP 90-alpha | HSP90AA1 |
| MOL000358 | beta-sitosterol | cAMP-dependent protein kinase catalytic subunit alpha | PRKACA |
| MOL000358 | beta-sitosterol | Muscarinic acetylcholine receptor M3 | CHRM3 |
| MOL000358 | beta-sitosterol | Muscarinic acetylcholine receptor M1 | CHRM1 |
| MOL000358 | beta-sitosterol | Muscarinic acetylcholine receptor M4 | CHRM4 |
| MOL000358 | beta-sitosterol | Alpha-1A adrenergic receptor | ADRA1A |
| MOL000358 | beta-sitosterol | Muscarinic acetylcholine receptor M2 | CHRM2 |
| MOL000358 | beta-sitosterol | Neuronal acetylcholine receptor subunit alpha-2 | CHRNA2 |
| MOL000358 | beta-sitosterol | Neuronal acetylcholine receptor subunit alpha-7 | CHRNA7 |
| MOL000358 | beta-sitosterol | Apoptosis regulator Bcl-2 | BCL2 |
| MOL000358 | beta-sitosterol | Caspase-9 | CASP9 |
| MOL000358 | beta-sitosterol | Caspase-3 | CASP3 |
| MOL000358 | beta-sitosterol | Caspase-8 | CASP8 |
| MOL000358 | beta-sitosterol | Protein kinase C alpha type | PRKCA |
| MOL000358 | beta-sitosterol | Serum paraoxonase/arylesterase 1 | PON1 |
| MOL001792 | DFV | Prostaglandin G/H synthase 1 | PTGS1 |
| MOL001792 | DFV | Estrogen receptor | ESR1 |
| MOL001792 | DFV | Heat shock protein HSP 90-alpha | HSP90AA1 |
| MOL001792 | DFV | cAMP-dependent protein kinase catalytic subunit alpha | PRKACA |
| MOL002714 | baicalein | Prostaglandin G/H synthase 1 | PTGS1 |
| MOL002714 | baicalein | Androgen receptor | AR |
| MOL002714 | baicalein | Heat shock protein HSP 90-alpha | HSP90AA1 |
| MOL002714 | baicalein | cAMP-dependent protein kinase catalytic subunit alpha | PRKACA |
| MOL002714 | baicalein | Dipeptidyl peptidase 4 | DPP4 |
| MOL002714 | baicalein | Trypsin-1 | PRSS1 |
| MOL002714 | baicalein | Nuclear receptor coactivator 2 | NCOA2 |
| MOL002714 | baicalein | Nuclear receptor coactivator 1 | NCOA1 |
| MOL002714 | baicalein | Transcription factor p65 | RELA |
| MOL002714 | baicalein | Apoptosis regulator Bcl-2 | BCL2 |
| MOL002714 | baicalein | Proto-oncogene c-Fos | FOS |
| MOL002714 | baicalein | Caspase-3 | CASP3 |
| MOL002714 | baicalein | Cellular tumor antigen p53 | TP63 |
| MOL002714 | baicalein | Hypoxia-inducible factor 1-alpha | HIF1A |
| MOL002714 | baicalein | Fos-related antigen 1 | FOSL1 |
| MOL002714 | baicalein | G2/mitotic-specific cyclin-B1 | CCNB1 |
| MOL002714 | baicalein | Aryl hydrocarbon receptor | AHR |
| MOL002714 | baicalein | Insulin-like growth factor II | IGF2 |
| MOL002714 | baicalein | Cytochrome c | CYCS |
| MOL002714 | baicalein | NADPH oxidase 5 | NOX5 |
| MOL002714 | baicalein | Apolipoprotein D | APOD |
| MOL002959 | 3'-Methoxydaidzein | Prostaglandin G/H synthase 1 | PTGS1 |
| MOL002959 | 3'-Methoxydaidzein | Estrogen receptor | ESR1 |
| MOL002959 | 3'-Methoxydaidzein | Androgen receptor | AR |
| MOL002959 | 3'-Methoxydaidzein | Peroxisome proliferator-activated receptor gamma | PPARG |
| MOL002959 | 3'-Methoxydaidzein | Estrogen receptor beta | ESR2 |
| MOL002959 | 3'-Methoxydaidzein | Glycogen synthase kinase-3 beta | GSK3B |
| MOL002959 | 3'-Methoxydaidzein | Heat shock protein HSP 90-alpha | HSP90AA1 |
| MOL002959 | 3'-Methoxydaidzein | Serine/threonine-protein kinase Chk1 | CHEK1 |
| MOL002959 | 3'-Methoxydaidzein | cAMP-dependent protein kinase catalytic subunit alpha | PRKACA |
| MOL002959 | 3'-Methoxydaidzein | Trypsin-1 | PRSS1 |
| MOL002959 | 3'-Methoxydaidzein | Nuclear receptor coactivator 1 | NCOA1 |
| MOL000358 | beta-sitosterol | Progesterone receptor | PGR |
| MOL000358 | beta-sitosterol | Nuclear receptor coactivator 2 | NCOA2 |
| MOL000358 | beta-sitosterol | Prostaglandin G/H synthase 1 | PTGS1 |
| MOL000358 | beta-sitosterol | Heat shock protein HSP 90-alpha | HSP90AA1 |
| MOL000358 | beta-sitosterol | cAMP-dependent protein kinase catalytic subunit alpha | PRKACA |
| MOL000358 | beta-sitosterol | Muscarinic acetylcholine receptor M3 | CHRM3 |
| MOL000358 | beta-sitosterol | Muscarinic acetylcholine receptor M1 | CHRM1 |
| MOL000358 | beta-sitosterol | Muscarinic acetylcholine receptor M4 | CHRM4 |
| MOL000358 | beta-sitosterol | Alpha-1A adrenergic receptor | ADRA1A |
| MOL000358 | beta-sitosterol | Muscarinic acetylcholine receptor M2 | CHRM2 |
| MOL000358 | beta-sitosterol | Neuronal acetylcholine receptor subunit alpha-2 | CHRNA2 |
| MOL000358 | beta-sitosterol | Neuronal acetylcholine receptor subunit alpha-7 | CHRNA7 |
| MOL000358 | beta-sitosterol | Apoptosis regulator Bcl-2 | BCL2 |
| MOL000358 | beta-sitosterol | Caspase-9 | CASP9 |
| MOL000358 | beta-sitosterol | Caspase-3 | CASP3 |
| MOL000358 | beta-sitosterol | Caspase-8 | CASP8 |
| MOL000358 | beta-sitosterol | Protein kinase C alpha type | PRKCA |
| MOL000358 | beta-sitosterol | Serum paraoxonase/arylesterase 1 | PON1 |
| MOL000359 | sitosterol | Progesterone receptor | PGR |
| MOL000359 | sitosterol | Nuclear receptor coactivator 2 | NCOA2 |
| MOL000359 | sitosterol | Mineralocorticoid receptor | NR3C2 |
| MOL004941 | (2R)-7-hydroxy-2-(4-hydroxyphenyl)chroman-4-one | Prostaglandin G/H synthase 1 | PTGS1 |
| MOL004941 | (2R)-7-hydroxy-2-(4-hydroxyphenyl)chroman-4-one | Estrogen receptor | ESR1 |
| MOL004941 | (2R)-7-hydroxy-2-(4-hydroxyphenyl)chroman-4-one | Heat shock protein HSP 90-alpha | HSP90AA1 |
| MOL004941 | (2R)-7-hydroxy-2-(4-hydroxyphenyl)chroman-4-one | cAMP-dependent protein kinase catalytic subunit alpha | PRKACA |
| MOL000546 | diosgenin | Progesterone receptor | PGR |
| MOL000546 | diosgenin | Mineralocorticoid receptor | NR3C2 |
| MOL000546 | diosgenin | Transcription factor p65 | RELA |
| MOL000546 | diosgenin | Cellular tumor antigen p53 | TP63 |
| MOL000546 | diosgenin | Fatty acid synthase | FASN |
| MOL000546 | diosgenin | Hypoxia-inducible factor 1-alpha | HIF1A |
| MOL000546 | diosgenin | Canalicular multispecific organic anion transporter 1 | ABCC2 |
| MOL000546 | diosgenin | Serine/threonine-protein kinase mTOR | MTOR |
| MOL006331 | 4',5-Dihydroxyflavone | Prostaglandin G/H synthase 1 | PTGS1 |
| MOL006331 | 4',5-Dihydroxyflavone | Androgen receptor | AR |
| MOL006331 | 4',5-Dihydroxyflavone | Dipeptidyl peptidase 4 | DPP4 |
| MOL006331 | 4',5-Dihydroxyflavone | Heat shock protein HSP 90-alpha | HSP90AA1 |
| MOL006331 | 4',5-Dihydroxyflavone | cAMP-dependent protein kinase catalytic subunit alpha | PRKACA |
| MOL001689 | acacetin | Prostaglandin G/H synthase 1 | PTGS1 |
| MOL001689 | acacetin | Androgen receptor | AR |
| MOL001689 | acacetin | Dipeptidyl peptidase 4 | DPP4 |
| MOL001689 | acacetin | Heat shock protein HSP 90-alpha | HSP90AA1 |
| MOL001689 | acacetin | cAMP-dependent protein kinase catalytic subunit alpha | PRKACA |
| MOL001689 | acacetin | Trypsin-1 | PRSS1 |
| MOL001689 | acacetin | Nuclear receptor coactivator 2 | NCOA2 |
| MOL001689 | acacetin | Nuclear receptor coactivator 1 | NCOA1 |
| MOL001689 | acacetin | Serine/threonine-protein kinase Chk1 | CHEK1 |
| MOL001689 | acacetin | Transcription factor p65 | RELA |
| MOL001689 | acacetin | Apoptosis regulator Bcl-2 | BCL2 |
| MOL001689 | acacetin | Caspase-3 | CASP3 |
| MOL001689 | acacetin | Cellular tumor antigen p53 | TP63 |
| MOL001689 | acacetin | Caspase-8 | CASP8 |
| MOL001689 | acacetin | Fatty acid synthase | FASN |
| MOL000173 | wogonin | Prostaglandin G/H synthase 1 | PTGS1 |
| MOL000173 | wogonin | Estrogen receptor | ESR1 |
| MOL000173 | wogonin | Androgen receptor | AR |
| MOL000173 | wogonin | Peroxisome proliferator-activated receptor gamma | PPARG |
| MOL000173 | wogonin | Dipeptidyl peptidase 4 | DPP4 |
| MOL000173 | wogonin | Glycogen synthase kinase-3 beta | GSK3B |
| MOL000173 | wogonin | Heat shock protein HSP 90-alpha | HSP90AA1 |
| MOL000173 | wogonin | Serine/threonine-protein kinase Chk1 | CHEK1 |
| MOL000173 | wogonin | cAMP-dependent protein kinase catalytic subunit alpha | PRKACA |
| MOL000173 | wogonin | Trypsin-1 | PRSS1 |
| MOL000173 | wogonin | Transcription factor p65 | RELA |
| MOL000173 | wogonin | G1/S-specific cyclin-D1 | CCND1 |
| MOL000173 | wogonin | Apoptosis regulator Bcl-2 | BCL2 |
| MOL000173 | wogonin | Eukaryotic translation initiation factor 6 | EIF6 |
| MOL000173 | wogonin | Caspase-9 | CASP9 |
| MOL000173 | wogonin | Interleukin-6 | IL6 |
| MOL000173 | wogonin | Activator of 90 kDa heat shock protein ATPase homolog 1 | AHSA1 |
| MOL000173 | wogonin | Caspase-3 | CASP3 |
| MOL000173 | wogonin | Cellular tumor antigen p53 | TP63 |
| MOL000173 | wogonin | Telomerase protein component 1 | TEP1 |
| MOL000173 | wogonin | Induced myeloid leukemia cell differentiation protein Mcl-1 | MCL1 |
| MOL000228 | (2R)-7-hydroxy-5-methoxy-2-phenylchroman-4-one | Prostaglandin G/H synthase 1 | PTGS1 |
| MOL000228 | (2R)-7-hydroxy-5-methoxy-2-phenylchroman-4-one | Muscarinic acetylcholine receptor M3 | CHRM3 |
| MOL000228 | (2R)-7-hydroxy-5-methoxy-2-phenylchroman-4-one | Muscarinic acetylcholine receptor M1 | CHRM1 |
| MOL000228 | (2R)-7-hydroxy-5-methoxy-2-phenylchroman-4-one | Estrogen receptor | ESR1 |
| MOL000228 | (2R)-7-hydroxy-5-methoxy-2-phenylchroman-4-one | Alpha-1A adrenergic receptor | ADRA1A |
| MOL000228 | (2R)-7-hydroxy-5-methoxy-2-phenylchroman-4-one | Heat shock protein HSP 90-alpha | HSP90AA1 |
| MOL000228 | (2R)-7-hydroxy-5-methoxy-2-phenylchroman-4-one | cAMP-dependent protein kinase catalytic subunit alpha | PRKACA |
| MOL000228 | (2R)-7-hydroxy-5-methoxy-2-phenylchroman-4-one | Neuronal acetylcholine receptor subunit alpha-7 | CHRNA7 |
| MOL002714 | baicalein | Prostaglandin G/H synthase 1 | PTGS1 |
| MOL002714 | baicalein | Androgen receptor | AR |
| MOL002714 | baicalein | Heat shock protein HSP 90-alpha | HSP90AA1 |
| MOL002714 | baicalein | cAMP-dependent protein kinase catalytic subunit alpha | PRKACA |
| MOL002714 | baicalein | Dipeptidyl peptidase 4 | DPP4 |
| MOL002714 | baicalein | Trypsin-1 | PRSS1 |
| MOL002714 | baicalein | Nuclear receptor coactivator 2 | NCOA2 |
| MOL002714 | baicalein | Nuclear receptor coactivator 1 | NCOA1 |
| MOL002714 | baicalein | Transcription factor p65 | RELA |
| MOL002714 | baicalein | Apoptosis regulator Bcl-2 | BCL2 |
| MOL002714 | baicalein | Proto-oncogene c-Fos | FOS |
| MOL002714 | baicalein | Caspase-3 | CASP3 |
| MOL002714 | baicalein | Cellular tumor antigen p53 | TP63 |
| MOL002714 | baicalein | Hypoxia-inducible factor 1-alpha | HIF1A |
| MOL002714 | baicalein | Fos-related antigen 1 | FOSL1 |
| MOL002714 | baicalein | G2/mitotic-specific cyclin-B1 | CCNB1 |
| MOL002714 | baicalein | Aryl hydrocarbon receptor | AHR |
| MOL002714 | baicalein | Insulin-like growth factor II | IGF2 |
| MOL002714 | baicalein | Cytochrome c | CYCS |
| MOL002714 | baicalein | NADPH oxidase 5 | NOX5 |
| MOL002714 | baicalein | Apolipoprotein D | APOD |
| MOL002909 | 5,7,2,5-tetrahydroxy-8,6-dimethoxyflavone | Prothrombin | F2 |
| MOL002909 | 5,7,2,5-tetrahydroxy-8,6-dimethoxyflavone | Androgen receptor | AR |
| MOL002909 | 5,7,2,5-tetrahydroxy-8,6-dimethoxyflavone | Coagulation factor X | F10 |
| MOL002909 | 5,7,2,5-tetrahydroxy-8,6-dimethoxyflavone | Dipeptidyl peptidase 4 | DPP4 |
| MOL002909 | 5,7,2,5-tetrahydroxy-8,6-dimethoxyflavone | Heat shock protein HSP 90-alpha | HSP90AA1 |
| MOL002909 | 5,7,2,5-tetrahydroxy-8,6-dimethoxyflavone | Trypsin-1 | PRSS1 |
| MOL002909 | 5,7,2,5-tetrahydroxy-8,6-dimethoxyflavone | Nuclear receptor coactivator 2 | NCOA2 |
| MOL002910 | Carthamidin | Prostaglandin G/H synthase 1 | PTGS1 |
| MOL002910 | Carthamidin | Heat shock protein HSP 90-alpha | HSP90AA1 |
| MOL002910 | Carthamidin | cAMP-dependent protein kinase catalytic subunit alpha | PRKACA |
| MOL002913 | Dihydrobaicalin_qt | Prostaglandin G/H synthase 1 | PTGS1 |
| MOL002913 | Dihydrobaicalin_qt | Heat shock protein HSP 90-alpha | HSP90AA1 |
| MOL002913 | Dihydrobaicalin_qt | cAMP-dependent protein kinase catalytic subunit alpha | PRKACA |
| MOL002914 | Eriodyctiol (flavanone) | Prostaglandin G/H synthase 1 | PTGS1 |
| MOL002914 | Eriodyctiol (flavanone) | Heat shock protein HSP 90-alpha | HSP90AA1 |
| MOL002914 | Eriodyctiol (flavanone) | cAMP-dependent protein kinase catalytic subunit alpha | PRKACA |
| MOL002914 | Eriodyctiol (flavanone) | Nuclear receptor coactivator 2 | NCOA2 |
| MOL002915 | Salvigenin | Prostaglandin G/H synthase 1 | PTGS1 |
| MOL002915 | Salvigenin | Prothrombin | F2 |
| MOL002915 | Salvigenin | Coagulation factor X | F10 |
| MOL002915 | Salvigenin | Acetylcholinesterase | ACHE |
| MOL002915 | Salvigenin | Dipeptidyl peptidase 4 | DPP4 |
| MOL002915 | Salvigenin | Heat shock protein HSP 90-alpha | HSP90AA1 |
| MOL002915 | Salvigenin | Trypsin-1 | PRSS1 |
| MOL002915 | Salvigenin | Nuclear receptor coactivator 2 | NCOA2 |
| MOL002915 | Salvigenin | Coagulation factor VII | F7 |
| MOL002917 | 5,2',6'-Trihydroxy-7,8-dimethoxyflavone | Prostaglandin G/H synthase 1 | PTGS1 |
| MOL002917 | 5,2',6'-Trihydroxy-7,8-dimethoxyflavone | Androgen receptor | AR |
| MOL002917 | 5,2',6'-Trihydroxy-7,8-dimethoxyflavone | Coagulation factor X | F10 |
| MOL002917 | 5,2',6'-Trihydroxy-7,8-dimethoxyflavone | Estrogen receptor beta | ESR2 |
| MOL002917 | 5,2',6'-Trihydroxy-7,8-dimethoxyflavone | Dipeptidyl peptidase 4 | DPP4 |
| MOL002917 | 5,2',6'-Trihydroxy-7,8-dimethoxyflavone | Heat shock protein HSP 90-alpha | HSP90AA1 |
| MOL002917 | 5,2',6'-Trihydroxy-7,8-dimethoxyflavone | Serine/threonine-protein kinase Chk1 | CHEK1 |
| MOL002917 | 5,2',6'-Trihydroxy-7,8-dimethoxyflavone | Trypsin-1 | PRSS1 |
| MOL002917 | 5,2',6'-Trihydroxy-7,8-dimethoxyflavone | Nuclear receptor coactivator 2 | NCOA2 |
| MOL002925 | 5,7,2',6'-Tetrahydroxyflavone | Prostaglandin G/H synthase 1 | PTGS1 |
| MOL002925 | 5,7,2',6'-Tetrahydroxyflavone | Androgen receptor | AR |
| MOL002925 | 5,7,2',6'-Tetrahydroxyflavone | Dipeptidyl peptidase 4 | DPP4 |
| MOL002925 | 5,7,2',6'-Tetrahydroxyflavone | Heat shock protein HSP 90-alpha | HSP90AA1 |
| MOL002925 | 5,7,2',6'-Tetrahydroxyflavone | cAMP-dependent protein kinase catalytic subunit alpha | PRKACA |
| MOL002927 | Skullcapflavone II | Prostaglandin G/H synthase 1 | PTGS1 |
| MOL002927 | Skullcapflavone II | Prothrombin | F2 |
| MOL002927 | Skullcapflavone II | Androgen receptor | AR |
| MOL002927 | Skullcapflavone II | Coagulation factor X | F10 |
| MOL002927 | Skullcapflavone II | Coagulation factor VII | F7 |
| MOL002927 | Skullcapflavone II | Voltage-dependent calcium channel subunit alpha-2/delta-1 | CACNA2D1 |
| MOL002927 | Skullcapflavone II | Dipeptidyl peptidase 4 | DPP4 |
| MOL002927 | Skullcapflavone II | Heat shock protein HSP 90-alpha | HSP90AA1 |
| MOL002927 | Skullcapflavone II | Trypsin-1 | PRSS1 |
| MOL002927 | Skullcapflavone II | Nuclear receptor coactivator 2 | NCOA2 |
| MOL002927 | Skullcapflavone II | Nuclear receptor coactivator 1 | NCOA1 |
| MOL002928 | oroxylin a | Prostaglandin G/H synthase 1 | PTGS1 |
| MOL002928 | oroxylin a | Androgen receptor | AR |
| MOL002928 | oroxylin a | Dipeptidyl peptidase 4 | DPP4 |
| MOL002928 | oroxylin a | Heat shock protein HSP 90-alpha | HSP90AA1 |
| MOL002928 | oroxylin a | cAMP-dependent protein kinase catalytic subunit alpha | PRKACA |
| MOL002928 | oroxylin a | Trypsin-1 | PRSS1 |
| MOL002928 | oroxylin a | Nuclear receptor coactivator 1 | NCOA1 |
| MOL002928 | oroxylin a | Nuclear receptor coactivator 2 | NCOA2 |
| MOL002928 | oroxylin a | Apoptosis regulator Bcl-2 | BCL2 |
| MOL002928 | oroxylin a | Interleukin-6 | IL6 |
| MOL002928 | oroxylin a | Caspase-3 | CASP3 |
| MOL002928 | oroxylin a | G2/mitotic-specific cyclin-B1 | CCNB1 |
| MOL002928 | oroxylin a | Cytochrome P450 2C9 | CYP2C9 |
| MOL002932 | Panicolin | Prostaglandin G/H synthase 1 | PTGS1 |
| MOL002932 | Panicolin | Androgen receptor | AR |
| MOL002932 | Panicolin | Estrogen receptor beta | ESR2 |
| MOL002932 | Panicolin | Dipeptidyl peptidase 4 | DPP4 |
| MOL002932 | Panicolin | Heat shock protein HSP 90-alpha | HSP90AA1 |
| MOL002932 | Panicolin | Serine/threonine-protein kinase Chk1 | CHEK1 |
| MOL002932 | Panicolin | Trypsin-1 | PRSS1 |
| MOL002932 | Panicolin | Nuclear receptor coactivator 1 | NCOA1 |
| MOL002933 | 5,7,4'-Trihydroxy-8-methoxyflavone | Prostaglandin G/H synthase 1 | PTGS1 |
| MOL002933 | 5,7,4'-Trihydroxy-8-methoxyflavone | Estrogen receptor | ESR1 |
| MOL002933 | 5,7,4'-Trihydroxy-8-methoxyflavone | Androgen receptor | AR |
| MOL002933 | 5,7,4'-Trihydroxy-8-methoxyflavone | Peroxisome proliferator-activated receptor gamma | PPARG |
| MOL002933 | 5,7,4'-Trihydroxy-8-methoxyflavone | Dipeptidyl peptidase 4 | DPP4 |
| MOL002933 | 5,7,4'-Trihydroxy-8-methoxyflavone | Glycogen synthase kinase-3 beta | GSK3B |
| MOL002933 | 5,7,4'-Trihydroxy-8-methoxyflavone | Heat shock protein HSP 90-alpha | HSP90AA1 |
| MOL002933 | 5,7,4'-Trihydroxy-8-methoxyflavone | Serine/threonine-protein kinase Chk1 | CHEK1 |
| MOL002933 | 5,7,4'-Trihydroxy-8-methoxyflavone | Trypsin-1 | PRSS1 |
| MOL002933 | 5,7,4'-Trihydroxy-8-methoxyflavone | Nuclear receptor coactivator 2 | NCOA2 |
| MOL002933 | 5,7,4'-Trihydroxy-8-methoxyflavone | cAMP-dependent protein kinase catalytic subunit alpha | PRKACA |
| MOL002934 | NEOBAICALEIN | Prothrombin | F2 |
| MOL002934 | NEOBAICALEIN | Estrogen receptor | ESR1 |
| MOL002934 | NEOBAICALEIN | Androgen receptor | AR |
| MOL002934 | NEOBAICALEIN | Peroxisome proliferator-activated receptor gamma | PPARG |
| MOL002934 | NEOBAICALEIN | Coagulation factor X | F10 |
| MOL002934 | NEOBAICALEIN | Coagulation factor VII | F7 |
| MOL002934 | NEOBAICALEIN | Estrogen receptor beta | ESR2 |
| MOL002934 | NEOBAICALEIN | Dipeptidyl peptidase 4 | DPP4 |
| MOL002934 | NEOBAICALEIN | Glycogen synthase kinase-3 beta | GSK3B |
| MOL002934 | NEOBAICALEIN | Heat shock protein HSP 90-alpha | HSP90AA1 |
| MOL002934 | NEOBAICALEIN | Serine/threonine-protein kinase Chk1 | CHEK1 |
| MOL002934 | NEOBAICALEIN | Trypsin-1 | PRSS1 |
| MOL002934 | NEOBAICALEIN | Nuclear receptor coactivator 2 | NCOA2 |
| MOL002937 | DIHYDROOROXYLIN | Prostaglandin G/H synthase 1 | PTGS1 |
| MOL002937 | DIHYDROOROXYLIN | Heat shock protein HSP 90-alpha | HSP90AA1 |
| MOL002937 | DIHYDROOROXYLIN | cAMP-dependent protein kinase catalytic subunit alpha | PRKACA |
| MOL002937 | DIHYDROOROXYLIN | Nuclear receptor coactivator 1 | NCOA1 |
| MOL000358 | beta-sitosterol | Progesterone receptor | PGR |
| MOL000358 | beta-sitosterol | Nuclear receptor coactivator 2 | NCOA2 |
| MOL000358 | beta-sitosterol | Prostaglandin G/H synthase 1 | PTGS1 |
| MOL000358 | beta-sitosterol | Heat shock protein HSP 90-alpha | HSP90AA1 |
| MOL000358 | beta-sitosterol | cAMP-dependent protein kinase catalytic subunit alpha | PRKACA |
| MOL000358 | beta-sitosterol | Muscarinic acetylcholine receptor M3 | CHRM3 |
| MOL000358 | beta-sitosterol | Muscarinic acetylcholine receptor M1 | CHRM1 |
| MOL000358 | beta-sitosterol | Muscarinic acetylcholine receptor M4 | CHRM4 |
| MOL000358 | beta-sitosterol | Alpha-1A adrenergic receptor | ADRA1A |
| MOL000358 | beta-sitosterol | Muscarinic acetylcholine receptor M2 | CHRM2 |
| MOL000358 | beta-sitosterol | Neuronal acetylcholine receptor subunit alpha-2 | CHRNA2 |
| MOL000358 | beta-sitosterol | Neuronal acetylcholine receptor subunit alpha-7 | CHRNA7 |
| MOL000358 | beta-sitosterol | Apoptosis regulator Bcl-2 | BCL2 |
| MOL000358 | beta-sitosterol | Caspase-9 | CASP9 |
| MOL000358 | beta-sitosterol | Caspase-3 | CASP3 |
| MOL000358 | beta-sitosterol | Caspase-8 | CASP8 |
| MOL000358 | beta-sitosterol | Protein kinase C alpha type | PRKCA |
| MOL000358 | beta-sitosterol | Serum paraoxonase/arylesterase 1 | PON1 |
| MOL000359 | sitosterol | Progesterone receptor | PGR |
| MOL000359 | sitosterol | Nuclear receptor coactivator 2 | NCOA2 |
| MOL000359 | sitosterol | Mineralocorticoid receptor | NR3C2 |
| MOL000525 | Norwogonin | Prostaglandin G/H synthase 1 | PTGS1 |
| MOL000525 | Norwogonin | Androgen receptor | AR |
| MOL000525 | Norwogonin | Peroxisome proliferator-activated receptor gamma | PPARG |
| MOL000525 | Norwogonin | Dipeptidyl peptidase 4 | DPP4 |
| MOL000525 | Norwogonin | Heat shock protein HSP 90-alpha | HSP90AA1 |
| MOL000525 | Norwogonin | Serine/threonine-protein kinase Chk1 | CHEK1 |
| MOL000525 | Norwogonin | cAMP-dependent protein kinase catalytic subunit alpha | PRKACA |
| MOL000552 | 5,2'-Dihydroxy-6,7,8-trimethoxyflavone | Prostaglandin G/H synthase 1 | PTGS1 |
| MOL000552 | 5,2'-Dihydroxy-6,7,8-trimethoxyflavone | Prothrombin | F2 |
| MOL000552 | 5,2'-Dihydroxy-6,7,8-trimethoxyflavone | Androgen receptor | AR |
| MOL000552 | 5,2'-Dihydroxy-6,7,8-trimethoxyflavone | Coagulation factor X | F10 |
| MOL000552 | 5,2'-Dihydroxy-6,7,8-trimethoxyflavone | Coagulation factor VII | F7 |
| MOL000552 | 5,2'-Dihydroxy-6,7,8-trimethoxyflavone | Estrogen receptor beta | ESR2 |
| MOL000552 | 5,2'-Dihydroxy-6,7,8-trimethoxyflavone | Dipeptidyl peptidase 4 | DPP4 |
| MOL000552 | 5,2'-Dihydroxy-6,7,8-trimethoxyflavone | Heat shock protein HSP 90-alpha | HSP90AA1 |
| MOL000552 | 5,2'-Dihydroxy-6,7,8-trimethoxyflavone | Trypsin-1 | PRSS1 |
| MOL000552 | 5,2'-Dihydroxy-6,7,8-trimethoxyflavone | Nuclear receptor coactivator 2 | NCOA2 |
| MOL000552 | 5,2'-Dihydroxy-6,7,8-trimethoxyflavone | Nuclear receptor coactivator 1 | NCOA1 |
| MOL000073 | ent-Epicatechin | Prostaglandin G/H synthase 1 | PTGS1 |
| MOL000073 | ent-Epicatechin | Estrogen receptor | ESR1 |
| MOL000073 | ent-Epicatechin | Heat shock protein HSP 90-alpha | HSP90AA1 |
| MOL000073 | ent-Epicatechin | cAMP-dependent protein kinase catalytic subunit alpha | PRKACA |
| MOL000449 | Stigmasterol | Progesterone receptor | PGR |
| MOL000449 | Stigmasterol | Mineralocorticoid receptor | NR3C2 |
| MOL000449 | Stigmasterol | Nuclear receptor coactivator 2 | NCOA2 |
| MOL000449 | Stigmasterol | Nuclear receptor coactivator 1 | NCOA1 |
| MOL000449 | Stigmasterol | Prostaglandin G/H synthase 1 | PTGS1 |
| MOL000449 | Stigmasterol | Aldose reductase | AKR1B1 |
| MOL000449 | Stigmasterol | Urokinase-type plasminogen activator | PLAU |
| MOL000449 | Stigmasterol | cAMP-dependent protein kinase catalytic subunit alpha | PRKACA |
| MOL000449 | Stigmasterol | Chymotrypsinogen B | CTRB1 |
| MOL000449 | Stigmasterol | Muscarinic acetylcholine receptor M3 | CHRM3 |
| MOL000449 | Stigmasterol | Muscarinic acetylcholine receptor M1 | CHRM1 |
| MOL000449 | Stigmasterol | Alpha-1A adrenergic receptor | ADRA1A |
| MOL000449 | Stigmasterol | Muscarinic acetylcholine receptor M2 | CHRM2 |
| MOL000449 | Stigmasterol | Neuronal acetylcholine receptor subunit alpha-7 | CHRNA7 |
| MOL001458 | coptisine | Prostaglandin G/H synthase 1 | PTGS1 |
| MOL001458 | coptisine | Estrogen receptor | ESR1 |
| MOL001458 | coptisine | Androgen receptor | AR |
| MOL001458 | coptisine | Trypsin-1 | PRSS1 |
| MOL002879 | Diop | Muscarinic acetylcholine receptor M3 | CHRM3 |
| MOL002897 | epiberberine | Estrogen receptor | ESR1 |
| MOL002897 | epiberberine | Androgen receptor | AR |
| MOL002897 | epiberberine | cAMP-dependent protein kinase catalytic subunit alpha | PRKACA |
| MOL002897 | epiberberine | Trypsin-1 | PRSS1 |
| MOL002897 | epiberberine | Nuclear receptor coactivator 2 | NCOA2 |
| MOL008206 | Moslosooflavone | Prostaglandin G/H synthase 1 | PTGS1 |
| MOL008206 | Moslosooflavone | Prothrombin | F2 |
| MOL008206 | Moslosooflavone | Androgen receptor | AR |
| MOL008206 | Moslosooflavone | Peroxisome proliferator-activated receptor gamma | PPARG |
| MOL008206 | Moslosooflavone | Estrogen receptor beta | ESR2 |
| MOL008206 | Moslosooflavone | Dipeptidyl peptidase 4 | DPP4 |
| MOL008206 | Moslosooflavone | Glycogen synthase kinase-3 beta | GSK3B |
| MOL008206 | Moslosooflavone | Heat shock protein HSP 90-alpha | HSP90AA1 |
| MOL008206 | Moslosooflavone | Serine/threonine-protein kinase Chk1 | CHEK1 |
| MOL008206 | Moslosooflavone | cAMP-dependent protein kinase catalytic subunit alpha | PRKACA |
| MOL008206 | Moslosooflavone | Trypsin-1 | PRSS1 |
| MOL008206 | Moslosooflavone | Nuclear receptor coactivator 1 | NCOA1 |
| MOL008206 | Moslosooflavone | Neuronal acetylcholine receptor subunit alpha-7 | CHRNA7 |
| MOL010415 | 11,13-Eicosadienoic acid, methyl ester | Nuclear receptor coactivator 2 | NCOA2 |
| MOL012245 | 5,7,4'-trihydroxy-6-methoxyflavanone | Prostaglandin G/H synthase 1 | PTGS1 |
| MOL012245 | 5,7,4'-trihydroxy-6-methoxyflavanone | Carbonic anhydrase 2 | CA2 |
| MOL012245 | 5,7,4'-trihydroxy-6-methoxyflavanone | Heat shock protein HSP 90-alpha | HSP90AA1 |
| MOL012245 | 5,7,4'-trihydroxy-6-methoxyflavanone | cAMP-dependent protein kinase catalytic subunit alpha | PRKACA |
| MOL012246 | 5,7,4'-trihydroxy-8-methoxyflavanone | Prostaglandin G/H synthase 1 | PTGS1 |
| MOL012246 | 5,7,4'-trihydroxy-8-methoxyflavanone | Carbonic anhydrase 2 | CA2 |
| MOL012246 | 5,7,4'-trihydroxy-8-methoxyflavanone | Heat shock protein HSP 90-alpha | HSP90AA1 |
| MOL012246 | 5,7,4'-trihydroxy-8-methoxyflavanone | cAMP-dependent protein kinase catalytic subunit alpha | PRKACA |
| MOL012266 | rivularin | Prostaglandin G/H synthase 1 | PTGS1 |
| MOL012266 | rivularin | Prothrombin | F2 |
| MOL012266 | rivularin | Androgen receptor | AR |
| MOL012266 | rivularin | Coagulation factor X | F10 |
| MOL012266 | rivularin | Carbonic anhydrase 2 | CA2 |
| MOL012266 | rivularin | Coagulation factor VII | F7 |
| MOL012266 | rivularin | Estrogen receptor beta | ESR2 |
| MOL012266 | rivularin | Dipeptidyl peptidase 4 | DPP4 |
| MOL012266 | rivularin | Heat shock protein HSP 90-alpha | HSP90AA1 |
| MOL012266 | rivularin | Trypsin-1 | PRSS1 |
| MOL012266 | rivularin | Nuclear receptor coactivator 2 | NCOA2 |
| MOL012266 | rivularin | Nuclear receptor coactivator 1 | NCOA1 |
| MOL000173 | wogonin | Prostaglandin G/H synthase 1 | PTGS1 |
| MOL000173 | wogonin | Estrogen receptor | ESR1 |
| MOL000173 | wogonin | Androgen receptor | AR |
| MOL000173 | wogonin | Peroxisome proliferator-activated receptor gamma | PPARG |
| MOL000173 | wogonin | Dipeptidyl peptidase 4 | DPP4 |
| MOL000173 | wogonin | Glycogen synthase kinase-3 beta | GSK3B |
| MOL000173 | wogonin | Heat shock protein HSP 90-alpha | HSP90AA1 |
| MOL000173 | wogonin | Serine/threonine-protein kinase Chk1 | CHEK1 |
| MOL000173 | wogonin | cAMP-dependent protein kinase catalytic subunit alpha | PRKACA |
| MOL000173 | wogonin | Trypsin-1 | PRSS1 |
| MOL000173 | wogonin | Transcription factor p65 | RELA |
| MOL000173 | wogonin | G1/S-specific cyclin-D1 | CCND1 |
| MOL000173 | wogonin | Apoptosis regulator Bcl-2 | BCL2 |
| MOL000173 | wogonin | Eukaryotic translation initiation factor 6 | EIF6 |
| MOL000173 | wogonin | Caspase-9 | CASP9 |
| MOL000173 | wogonin | Interleukin-6 | IL6 |
| MOL000173 | wogonin | Activator of 90 kDa heat shock protein ATPase homolog 1 | AHSA1 |
| MOL000173 | wogonin | Caspase-3 | CASP3 |
| MOL000173 | wogonin | Cellular tumor antigen p53 | TP63 |
| MOL000173 | wogonin | Telomerase protein component 1 | TEP1 |
| MOL000173 | wogonin | Induced myeloid leukemia cell differentiation protein Mcl-1 | MCL1 |
| MOL003283 | (2R,3R,4S)-4-(4-hydroxy-3-methoxy-phenyl)-7-methoxy-2,3-dimethylol-tetralin-6-ol | Estrogen receptor | ESR1 |
| MOL003283 | (2R,3R,4S)-4-(4-hydroxy-3-methoxy-phenyl)-7-methoxy-2,3-dimethylol-tetralin-6-ol | Androgen receptor | AR |
| MOL003283 | (2R,3R,4S)-4-(4-hydroxy-3-methoxy-phenyl)-7-methoxy-2,3-dimethylol-tetralin-6-ol | Peroxisome proliferator-activated receptor gamma | PPARG |
| MOL003283 | (2R,3R,4S)-4-(4-hydroxy-3-methoxy-phenyl)-7-methoxy-2,3-dimethylol-tetralin-6-ol | Coagulation factor X | F10 |
| MOL003283 | (2R,3R,4S)-4-(4-hydroxy-3-methoxy-phenyl)-7-methoxy-2,3-dimethylol-tetralin-6-ol | Carbonic anhydrase 2 | CA2 |
| MOL003283 | (2R,3R,4S)-4-(4-hydroxy-3-methoxy-phenyl)-7-methoxy-2,3-dimethylol-tetralin-6-ol | Coagulation factor VII | F7 |
| MOL003283 | (2R,3R,4S)-4-(4-hydroxy-3-methoxy-phenyl)-7-methoxy-2,3-dimethylol-tetralin-6-ol | Estrogen receptor beta | ESR2 |
| MOL003283 | (2R,3R,4S)-4-(4-hydroxy-3-methoxy-phenyl)-7-methoxy-2,3-dimethylol-tetralin-6-ol | Glycogen synthase kinase-3 beta | GSK3B |
| MOL003283 | (2R,3R,4S)-4-(4-hydroxy-3-methoxy-phenyl)-7-methoxy-2,3-dimethylol-tetralin-6-ol | Heat shock protein HSP 90-alpha | HSP90AA1 |
| MOL003283 | (2R,3R,4S)-4-(4-hydroxy-3-methoxy-phenyl)-7-methoxy-2,3-dimethylol-tetralin-6-ol | Serine/threonine-protein kinase Chk1 | CHEK1 |
| MOL003283 | (2R,3R,4S)-4-(4-hydroxy-3-methoxy-phenyl)-7-methoxy-2,3-dimethylol-tetralin-6-ol | Nuclear receptor coactivator 2 | NCOA2 |
| MOL003283 | (2R,3R,4S)-4-(4-hydroxy-3-methoxy-phenyl)-7-methoxy-2,3-dimethylol-tetralin-6-ol | Prostaglandin G/H synthase 1 | PTGS1 |
| MOL003290 | (3R,4R)-3,4-bis[(3,4-dimethoxyphenyl)methyl]oxolan-2-one | Muscarinic acetylcholine receptor M3 | CHRM3 |
| MOL003290 | (3R,4R)-3,4-bis[(3,4-dimethoxyphenyl)methyl]oxolan-2-one | Estrogen receptor | ESR1 |
| MOL003290 | (3R,4R)-3,4-bis[(3,4-dimethoxyphenyl)methyl]oxolan-2-one | Coagulation factor X | F10 |
| MOL003290 | (3R,4R)-3,4-bis[(3,4-dimethoxyphenyl)methyl]oxolan-2-one | Coagulation factor VII | F7 |
| MOL003290 | (3R,4R)-3,4-bis[(3,4-dimethoxyphenyl)methyl]oxolan-2-one | Heat shock protein HSP 90-alpha | HSP90AA1 |
| MOL003290 | (3R,4R)-3,4-bis[(3,4-dimethoxyphenyl)methyl]oxolan-2-one | Nuclear receptor coactivator 2 | NCOA2 |
| MOL003295 | (+)-pinoresinol monomethyl ether | Prostaglandin G/H synthase 1 | PTGS1 |
| MOL003295 | (+)-pinoresinol monomethyl ether | Coagulation factor X | F10 |
| MOL003295 | (+)-pinoresinol monomethyl ether | Heat shock protein HSP 90-alpha | HSP90AA1 |
| MOL003295 | (+)-pinoresinol monomethyl ether | Nuclear receptor coactivator 2 | NCOA2 |
| MOL003295 | (+)-pinoresinol monomethyl ether | Nuclear receptor coactivator 1 | NCOA1 |
| MOL003306 | ACon1_001697 | Prostaglandin G/H synthase 1 | PTGS1 |
| MOL003306 | ACon1_001697 | Coagulation factor X | F10 |
| MOL003306 | ACon1_001697 | Heat shock protein HSP 90-alpha | HSP90AA1 |
| MOL003306 | ACon1_001697 | cAMP-dependent protein kinase catalytic subunit alpha | PRKACA |
| MOL003306 | ACon1_001697 | Nuclear receptor coactivator 2 | NCOA2 |
| MOL003306 | ACon1_001697 | Nuclear receptor coactivator 1 | NCOA1 |
| MOL003308 | (+)-pinoresinol monomethyl ether-4-D-beta-glucoside_qt | Coagulation factor X | F10 |
| MOL003308 | (+)-pinoresinol monomethyl ether-4-D-beta-glucoside_qt | Heat shock protein HSP 90-alpha | HSP90AA1 |
| MOL003308 | (+)-pinoresinol monomethyl ether-4-D-beta-glucoside_qt | cAMP-dependent protein kinase catalytic subunit alpha | PRKACA |
| MOL003308 | (+)-pinoresinol monomethyl ether-4-D-beta-glucoside_qt | Nuclear receptor coactivator 2 | NCOA2 |
| MOL003308 | (+)-pinoresinol monomethyl ether-4-D-beta-glucoside_qt | Nuclear receptor coactivator 1 | NCOA1 |
| MOL003315 | 3beta-Acetyl-20,25-epoxydammarane-24alpha-ol | Glucocorticoid receptor | NR3C1 |
| MOL000211 | Mairin | Progesterone receptor | PGR |
| MOL003322 | FORSYTHINOL | Coagulation factor X | F10 |
| MOL003322 | FORSYTHINOL | Heat shock protein HSP 90-alpha | HSP90AA1 |
| MOL003322 | FORSYTHINOL | Nuclear receptor coactivator 2 | NCOA2 |
| MOL003322 | FORSYTHINOL | Nuclear receptor coactivator 1 | NCOA1 |
| MOL003330 | (-)-Phillygenin | Muscarinic acetylcholine receptor M3 | CHRM3 |
| MOL003330 | (-)-Phillygenin | Muscarinic acetylcholine receptor M1 | CHRM1 |
| MOL003330 | (-)-Phillygenin | Coagulation factor X | F10 |
| MOL003330 | (-)-Phillygenin | Muscarinic acetylcholine receptor M5 | CHRM5 |
| MOL003330 | (-)-Phillygenin | Heat shock protein HSP 90-alpha | HSP90AA1 |
| MOL003330 | (-)-Phillygenin | Nuclear receptor coactivator 2 | NCOA2 |
| MOL003347 | hyperforin | Cytochrome P450 3A4 | CYP3A4 |
| MOL003347 | hyperforin | Intercellular adhesion molecule 1 | ICAM1 |
| MOL003370 | Onjixanthone I | Prostaglandin G/H synthase 1 | PTGS1 |
| MOL003370 | Onjixanthone I | Estrogen receptor beta | ESR2 |
| MOL003370 | Onjixanthone I | Dipeptidyl peptidase 4 | DPP4 |
| MOL003370 | Onjixanthone I | Heat shock protein HSP 90-alpha | HSP90AA1 |
| MOL003370 | Onjixanthone I | Serine/threonine-protein kinase Chk1 | CHEK1 |
| MOL000358 | beta-sitosterol | Progesterone receptor | PGR |
| MOL000358 | beta-sitosterol | Nuclear receptor coactivator 2 | NCOA2 |
| MOL000358 | beta-sitosterol | Prostaglandin G/H synthase 1 | PTGS1 |
| MOL000358 | beta-sitosterol | Heat shock protein HSP 90-alpha | HSP90AA1 |
| MOL000358 | beta-sitosterol | cAMP-dependent protein kinase catalytic subunit alpha | PRKACA |
| MOL000358 | beta-sitosterol | Muscarinic acetylcholine receptor M3 | CHRM3 |
| MOL000358 | beta-sitosterol | Muscarinic acetylcholine receptor M1 | CHRM1 |
| MOL000358 | beta-sitosterol | Muscarinic acetylcholine receptor M4 | CHRM4 |
| MOL000358 | beta-sitosterol | Alpha-1A adrenergic receptor | ADRA1A |
| MOL000358 | beta-sitosterol | Muscarinic acetylcholine receptor M2 | CHRM2 |
| MOL000358 | beta-sitosterol | Neuronal acetylcholine receptor subunit alpha-2 | CHRNA2 |
| MOL000358 | beta-sitosterol | Neuronal acetylcholine receptor subunit alpha-7 | CHRNA7 |
| MOL000358 | beta-sitosterol | Apoptosis regulator Bcl-2 | BCL2 |
| MOL000358 | beta-sitosterol | Caspase-9 | CASP9 |
| MOL000358 | beta-sitosterol | Caspase-3 | CASP3 |
| MOL000358 | beta-sitosterol | Caspase-8 | CASP8 |
| MOL000358 | beta-sitosterol | Protein kinase C alpha type | PRKCA |
| MOL000358 | beta-sitosterol | Serum paraoxonase/arylesterase 1 | PON1 |
| MOL000422 | kaempferol | Prostaglandin G/H synthase 1 | PTGS1 |
| MOL000422 | kaempferol | Androgen receptor | AR |
| MOL000422 | kaempferol | Peroxisome proliferator-activated receptor gamma | PPARG |
| MOL000422 | kaempferol | Heat shock protein HSP 90-alpha | HSP90AA1 |
| MOL000422 | kaempferol | cAMP-dependent protein kinase catalytic subunit alpha | PRKACA |
| MOL000422 | kaempferol | Nuclear receptor coactivator 2 | NCOA2 |
| MOL000422 | kaempferol | Dipeptidyl peptidase 4 | DPP4 |
| MOL000422 | kaempferol | Trypsin-1 | PRSS1 |
| MOL000422 | kaempferol | Progesterone receptor | PGR |
| MOL000422 | kaempferol | Prothrombin | F2 |
| MOL000422 | kaempferol | Muscarinic acetylcholine receptor M1 | CHRM1 |
| MOL000422 | kaempferol | Acetylcholinesterase | ACHE |
| MOL000422 | kaempferol | Muscarinic acetylcholine receptor M2 | CHRM2 |
| MOL000422 | kaempferol | Coagulation factor VII | F7 |
| MOL000422 | kaempferol | Transcription factor p65 | RELA |
| MOL000422 | kaempferol | Inhibitor of nuclear factor kappa-B kinase subunit beta | IKBKB |
| MOL000422 | kaempferol | Apoptosis regulator Bcl-2 | BCL2 |
| MOL000422 | kaempferol | Activator of 90 kDa heat shock protein ATPase homolog 1 | AHSA1 |
| MOL000422 | kaempferol | Caspase-3 | CASP3 |
| MOL000422 | kaempferol | Mitogen-activated protein kinase 8 | MAPK8 |
| MOL000422 | kaempferol | Peroxisome proliferator-activated receptor gamma | PPARG |
| MOL000422 | kaempferol | Cytochrome P450 3A4 | CYP3A4 |
| MOL000422 | kaempferol | Cytochrome P450 1A1 | CYP1A1 |
| MOL000422 | kaempferol | Intercellular adhesion molecule 1 | ICAM1 |
| MOL000422 | kaempferol | E-selectin | SELE |
| MOL000422 | kaempferol | Vascular cell adhesion protein 1 | VCAM1 |
| MOL000422 | kaempferol | Cytochrome P450 1B1 | CYP1B1 |
| MOL000422 | kaempferol | Arachidonate 5-lipoxygenase | ALOX5 |
| MOL000422 | kaempferol | Aryl hydrocarbon receptor | AHR |
| MOL000422 | kaempferol | 26S proteasome non-ATPase regulatory subunit 3 | PSMD3 |
| MOL000422 | kaempferol | Nuclear receptor subfamily 1 group I member 3 | NR1I3 |
| MOL000422 | kaempferol | Type I iodothyronine deiodinase | DIO1 |
| MOL000422 | kaempferol | Glutathione S-transferase Mu 1 | GSTM1 |
| MOL000422 | kaempferol | Glutathione S-transferase Mu 2 | GSTM2 |
| MOL000422 | kaempferol | Aldo-keto reductase family 1 member C3 | AKR1C3 |
| MOL000522 | arctiin | Coagulation factor X | F10 |
| MOL000522 | arctiin | Heat shock protein HSP 90-alpha | HSP90AA1 |
| MOL000522 | arctiin | Nuclear receptor coactivator 1 | NCOA1 |
| MOL000522 | arctiin | Mucin-1 | MUC1 |
| MOL000006 | luteolin | Prostaglandin G/H synthase 1 | PTGS1 |
| MOL000006 | luteolin | Androgen receptor | AR |
| MOL000006 | luteolin | Heat shock protein HSP 90-alpha | HSP90AA1 |
| MOL000006 | luteolin | Trypsin-1 | PRSS1 |
| MOL000006 | luteolin | Nuclear receptor coactivator 2 | NCOA2 |
| MOL000006 | luteolin | cAMP-dependent protein kinase catalytic subunit alpha | PRKACA |
| MOL000006 | luteolin | Dipeptidyl peptidase 4 | DPP4 |
| MOL000006 | luteolin | Transcription factor p65 | RELA |
| MOL000006 | luteolin | Epidermal growth factor receptor | EGFR |
| MOL000006 | luteolin | G1/S-specific cyclin-D1 | CCND1 |
| MOL000006 | luteolin | Caspase-9 | CASP9 |
| MOL000006 | luteolin | Retinoblastoma-associated protein | RB1 |
| MOL000006 | luteolin | Interleukin-6 | IL6 |
| MOL000006 | luteolin | Caspase-3 | CASP3 |
| MOL000006 | luteolin | Cellular tumor antigen p53 | TP63 |
| MOL000006 | luteolin | NF-kappa-B inhibitor alpha | NFKBIA |
| MOL000006 | luteolin | E3 ubiquitin-protein ligase Mdm2 | MDM2 |
| MOL000006 | luteolin | Amyloid beta A4 protein | APP |
| MOL000006 | luteolin | Proliferating cell nuclear antigen | PCNA |
| MOL000006 | luteolin | Receptor tyrosine-protein kinase erbB-2 | ERBB2 |
| MOL000006 | luteolin | Peroxisome proliferator-activated receptor gamma | PPARG |
| MOL000006 | luteolin | Caspase-7 | CASP7 |
| MOL000006 | luteolin | Intercellular adhesion molecule 1 | ICAM1 |
| MOL000006 | luteolin | Induced myeloid leukemia cell differentiation protein Mcl-1 | MCL1 |
| MOL000006 | luteolin | Baculoviral IAP repeat-containing protein 5 | BIRC5 |
| MOL000006 | luteolin | G2/mitotic-specific cyclin-B1 | CCNB1 |
| MOL000006 | luteolin | Tyrosinase | TYR |
| MOL000006 | luteolin | Kinetochore protein Nuf2 | NUF2 |
| MOL000791 | bicuculline | Prostaglandin G/H synthase 1 | PTGS1 |
| MOL000791 | bicuculline | Prothrombin | F2 |
| MOL000791 | bicuculline | Androgen receptor | AR |
| MOL000791 | bicuculline | Coagulation factor X | F10 |
| MOL000791 | bicuculline | Acetylcholinesterase | ACHE |
| MOL000791 | bicuculline | Heat shock protein HSP 90-alpha | HSP90AA1 |
| MOL000791 | bicuculline | cAMP-dependent protein kinase catalytic subunit alpha | PRKACA |
| MOL000791 | bicuculline | Proto-oncogene c-Fos | FOS |
| MOL000791 | bicuculline | Gamma-aminobutyric acid type B receptor subunit 1 | GABBR1 |
| MOL000791 | bicuculline | Metabotropic glutamate receptor 5 | GRM5 |
| MOL000098 | quercetin | Prostaglandin G/H synthase 1 | PTGS1 |
| MOL000098 | quercetin | Androgen receptor | AR |
| MOL000098 | quercetin | Peroxisome proliferator-activated receptor gamma | PPARG |
| MOL000098 | quercetin | Heat shock protein HSP 90-alpha | HSP90AA1 |
| MOL000098 | quercetin | Nuclear receptor coactivator 2 | NCOA2 |
| MOL000098 | quercetin | Dipeptidyl peptidase 4 | DPP4 |
| MOL000098 | quercetin | Aldose reductase | AKR1B1 |
| MOL000098 | quercetin | Trypsin-1 | PRSS1 |
| MOL000098 | quercetin | Prothrombin | F2 |
| MOL000098 | quercetin | Coagulation factor X | F10 |
| MOL000098 | quercetin | cAMP-dependent protein kinase catalytic subunit alpha | PRKACA |
| MOL000098 | quercetin | Coagulation factor VII | F7 |
| MOL000098 | quercetin | Acetylcholinesterase | ACHE |
| MOL000098 | quercetin | Transcription factor p65 | RELA |
| MOL000098 | quercetin | Epidermal growth factor receptor | EGFR |
| MOL000098 | quercetin | G1/S-specific cyclin-D1 | CCND1 |
| MOL000098 | quercetin | Apoptosis regulator Bcl-2 | BCL2 |
| MOL000098 | quercetin | Proto-oncogene c-Fos | FOS |
| MOL000098 | quercetin | Eukaryotic translation initiation factor 6 | EIF6 |
| MOL000098 | quercetin | Caspase-9 | CASP9 |
| MOL000098 | quercetin | Urokinase-type plasminogen activator | PLAU |
| MOL000098 | quercetin | Retinoblastoma-associated protein | RB1 |
| MOL000098 | quercetin | Interleukin-6 | IL6 |
| MOL000098 | quercetin | Activator of 90 kDa heat shock protein ATPase homolog 1 | AHSA1 |
| MOL000098 | quercetin | Caspase-3 | CASP3 |
| MOL000098 | quercetin | Cellular tumor antigen p53 | TP63 |
| MOL000098 | quercetin | ETS domain-containing protein Elk-1 | ELK1 |
| MOL000098 | quercetin | NF-kappa-B inhibitor alpha | NFKBIA |
| MOL000098 | quercetin | Caspase-8 | CASP8 |
| MOL000098 | quercetin | RAF proto-oncogene serine/threonine-protein kinase | RAF1 |
| MOL000098 | quercetin | Protein kinase C alpha type | PRKCA |
| MOL000098 | quercetin | Hypoxia-inducible factor 1-alpha | HIF1A |
| MOL000098 | quercetin | Protein CBFA2T1 | RUNX1T1 |
| MOL000098 | quercetin | Receptor tyrosine-protein kinase erbB-2 | ERBB2 |
| MOL000098 | quercetin | Peroxisome proliferator-activated receptor gamma | PPARG |
| MOL000098 | quercetin | Acetyl-CoA carboxylase 1 | ACACA |
| MOL000098 | quercetin | Cytochrome P450 3A4 | CYP3A4 |
| MOL000098 | quercetin | Caveolin-1 | CAV1 |
| MOL000098 | quercetin | Myc proto-oncogene protein | MYC |
| MOL000098 | quercetin | Cytochrome P450 1A1 | CYP1A1 |
| MOL000098 | quercetin | Intercellular adhesion molecule 1 | ICAM1 |
| MOL000098 | quercetin | E-selectin | SELE |
| MOL000098 | quercetin | Vascular cell adhesion protein 1 | VCAM1 |
| MOL000098 | quercetin | Baculoviral IAP repeat-containing protein 5 | BIRC5 |
| MOL000098 | quercetin | Dual oxidase 2 | DUOX2 |
| MOL000098 | quercetin | Heat shock protein beta-1 | HSPB1 |
| MOL000098 | quercetin | Cytochrome P450 1B1 | CYP1B1 |
| MOL000098 | quercetin | G2/mitotic-specific cyclin-B1 | CCNB1 |
| MOL000098 | quercetin | Arachidonate 5-lipoxygenase | ALOX5 |
| MOL000098 | quercetin | Nuclear factor erythroid 2-related factor 2 | NFE2L2 |
| MOL000098 | quercetin | NAD(P)H dehydrogenase [quinone] 1 | NQO1 |
| MOL000098 | quercetin | Poly [ADP-ribose] polymerase 1 | PARP1 |
| MOL000098 | quercetin | Aryl hydrocarbon receptor | AHR |
| MOL000098 | quercetin | 26S proteasome non-ATPase regulatory subunit 3 | PSMD3 |
| MOL000098 | quercetin | Collagen alpha-1(III) chain | COL3A1 |
| MOL000098 | quercetin | DDB1- and CUL4-associated factor 5 | DCAF5 |
| MOL000098 | quercetin | Nuclear receptor subfamily 1 group I member 3 | NR1I3 |
| MOL000098 | quercetin | Serine/threonine-protein kinase Chk2 | CHEK2 |
| MOL000098 | quercetin | Heat shock factor protein 1 | HSF1 |
| MOL000098 | quercetin | C-reactive protein | CRP |
| MOL000098 | quercetin | Runt-related transcription factor 2 | RUNX2 |
| MOL000098 | quercetin | Ras association domain-containing protein 1 | RASSF1 |
| MOL000098 | quercetin | Cathepsin D | CTSD |
| MOL000098 | quercetin | Insulin-like growth factor-binding protein 3 | IGFBP3 |
| MOL000098 | quercetin | Insulin-like growth factor II | IGF2 |
| MOL000098 | quercetin | Interferon regulatory factor 1 | IRF1 |
| MOL000098 | quercetin | Receptor tyrosine-protein kinase erbB-3 | ERBB3 |
| MOL000098 | quercetin | Serum paraoxonase/arylesterase 1 | PON1 |
| MOL000098 | quercetin | Type I iodothyronine deiodinase | DIO1 |
| MOL000098 | quercetin | Puromycin-sensitive aminopeptidase | NPEPPS |
| MOL000098 | quercetin | Hexokinase-2 | HK2 |
| MOL000098 | quercetin | Ras GTPase-activating protein 1 | RASA1 |
| MOL000098 | quercetin | Glutathione S-transferase Mu 1 | GSTM1 |
| MOL000098 | quercetin | Glutathione S-transferase Mu 2 | GSTM2 |
| MOL000098 | quercetin | Prostaglandin G/H synthase 1 | PTGS1 |
| MOL000098 | quercetin | Androgen receptor | AR |
| MOL000098 | quercetin | Peroxisome proliferator-activated receptor gamma | PPARG |
| MOL000098 | quercetin | Heat shock protein HSP 90-alpha | HSP90AA1 |
| MOL000098 | quercetin | Nuclear receptor coactivator 2 | NCOA2 |
| MOL000098 | quercetin | Dipeptidyl peptidase 4 | DPP4 |
| MOL000098 | quercetin | Aldose reductase | AKR1B1 |
| MOL000098 | quercetin | Trypsin-1 | PRSS1 |
| MOL000098 | quercetin | Prothrombin | F2 |
| MOL000098 | quercetin | Coagulation factor X | F10 |
| MOL000098 | quercetin | cAMP-dependent protein kinase catalytic subunit alpha | PRKACA |
| MOL000098 | quercetin | Coagulation factor VII | F7 |
| MOL000098 | quercetin | Acetylcholinesterase | ACHE |
| MOL000098 | quercetin | Transcription factor p65 | RELA |
| MOL000098 | quercetin | Epidermal growth factor receptor | EGFR |
| MOL000098 | quercetin | G1/S-specific cyclin-D1 | CCND1 |
| MOL000098 | quercetin | Apoptosis regulator Bcl-2 | BCL2 |
| MOL000098 | quercetin | Proto-oncogene c-Fos | FOS |
| MOL000098 | quercetin | Eukaryotic translation initiation factor 6 | EIF6 |
| MOL000098 | quercetin | Caspase-9 | CASP9 |
| MOL000098 | quercetin | Urokinase-type plasminogen activator | PLAU |
| MOL000098 | quercetin | Retinoblastoma-associated protein | RB1 |
| MOL000098 | quercetin | Interleukin-6 | IL6 |
| MOL000098 | quercetin | Activator of 90 kDa heat shock protein ATPase homolog 1 | AHSA1 |
| MOL000098 | quercetin | Caspase-3 | CASP3 |
| MOL000098 | quercetin | Cellular tumor antigen p53 | TP63 |
| MOL000098 | quercetin | ETS domain-containing protein Elk-1 | ELK1 |
| MOL000098 | quercetin | NF-kappa-B inhibitor alpha | NFKBIA |
| MOL000098 | quercetin | Caspase-8 | CASP8 |
| MOL000098 | quercetin | RAF proto-oncogene serine/threonine-protein kinase | RAF1 |
| MOL000098 | quercetin | Protein kinase C alpha type | PRKCA |
| MOL000098 | quercetin | Hypoxia-inducible factor 1-alpha | HIF1A |
| MOL000098 | quercetin | Protein CBFA2T1 | RUNX1T1 |
| MOL000098 | quercetin | Receptor tyrosine-protein kinase erbB-2 | ERBB2 |
| MOL000098 | quercetin | Peroxisome proliferator-activated receptor gamma | PPARG |
| MOL000098 | quercetin | Acetyl-CoA carboxylase 1 | ACACA |
| MOL000098 | quercetin | Cytochrome P450 3A4 | CYP3A4 |
| MOL000098 | quercetin | Caveolin-1 | CAV1 |
| MOL000098 | quercetin | Myc proto-oncogene protein | MYC |
| MOL000098 | quercetin | Cytochrome P450 1A1 | CYP1A1 |
| MOL000098 | quercetin | Intercellular adhesion molecule 1 | ICAM1 |
| MOL000098 | quercetin | E-selectin | SELE |
| MOL000098 | quercetin | Vascular cell adhesion protein 1 | VCAM1 |
| MOL000098 | quercetin | Baculoviral IAP repeat-containing protein 5 | BIRC5 |
| MOL000098 | quercetin | Dual oxidase 2 | DUOX2 |
| MOL000098 | quercetin | Heat shock protein beta-1 | HSPB1 |
| MOL000098 | quercetin | Cytochrome P450 1B1 | CYP1B1 |
| MOL000098 | quercetin | G2/mitotic-specific cyclin-B1 | CCNB1 |
| MOL000098 | quercetin | Arachidonate 5-lipoxygenase | ALOX5 |
| MOL000098 | quercetin | Nuclear factor erythroid 2-related factor 2 | NFE2L2 |
| MOL000098 | quercetin | NAD(P)H dehydrogenase [quinone] 1 | NQO1 |
| MOL000098 | quercetin | Poly [ADP-ribose] polymerase 1 | PARP1 |
| MOL000098 | quercetin | Aryl hydrocarbon receptor | AHR |
| MOL000098 | quercetin | 26S proteasome non-ATPase regulatory subunit 3 | PSMD3 |
| MOL000098 | quercetin | Collagen alpha-1(III) chain | COL3A1 |
| MOL000098 | quercetin | DDB1- and CUL4-associated factor 5 | DCAF5 |
| MOL000098 | quercetin | Nuclear receptor subfamily 1 group I member 3 | NR1I3 |
| MOL000098 | quercetin | Serine/threonine-protein kinase Chk2 | CHEK2 |
| MOL000098 | quercetin | Heat shock factor protein 1 | HSF1 |
| MOL000098 | quercetin | C-reactive protein | CRP |
| MOL000098 | quercetin | Runt-related transcription factor 2 | RUNX2 |
| MOL000098 | quercetin | Ras association domain-containing protein 1 | RASSF1 |
| MOL000098 | quercetin | Cathepsin D | CTSD |
| MOL000098 | quercetin | Insulin-like growth factor-binding protein 3 | IGFBP3 |
| MOL000098 | quercetin | Insulin-like growth factor II | IGF2 |
| MOL000098 | quercetin | Interferon regulatory factor 1 | IRF1 |
| MOL000098 | quercetin | Receptor tyrosine-protein kinase erbB-3 | ERBB3 |
| MOL000098 | quercetin | Serum paraoxonase/arylesterase 1 | PON1 |
| MOL000098 | quercetin | Type I iodothyronine deiodinase | DIO1 |
| MOL000098 | quercetin | Puromycin-sensitive aminopeptidase | NPEPPS |
| MOL000098 | quercetin | Hexokinase-2 | HK2 |
| MOL000098 | quercetin | Ras GTPase-activating protein 1 | RASA1 |
| MOL000098 | quercetin | Glutathione S-transferase Mu 1 | GSTM1 |
| MOL000098 | quercetin | Glutathione S-transferase Mu 2 | GSTM2 |
| MOL000359 | sitosterol | Progesterone receptor | PGR |
| MOL000359 | sitosterol | Nuclear receptor coactivator 2 | NCOA2 |
| MOL000359 | sitosterol | Mineralocorticoid receptor | NR3C2 |
| MOL001002 | ellagic acid | Estrogen receptor | ESR1 |
| MOL001002 | ellagic acid | Androgen receptor | AR |
| MOL001002 | ellagic acid | Progesterone receptor | PGR |
| MOL001002 | ellagic acid | Heat shock protein HSP 90-alpha | HSP90AA1 |
| MOL001002 | ellagic acid | Transcription factor p65 | RELA |
| MOL001002 | ellagic acid | NF-kappa-B inhibitor alpha | NFKBIA |
| MOL001002 | ellagic acid | Insulin-like growth factor II | IGF2 |
| MOL001002 | ellagic acid | Glutathione S-transferase Mu 1 | GSTM1 |
| MOL001002 | ellagic acid | Glutathione S-transferase Mu 2 | GSTM2 |
| MOL001924 | paeoniflorin | Interleukin-6 | IL6 |
| MOL002714 | baicalein | Prostaglandin G/H synthase 1 | PTGS1 |
| MOL002714 | baicalein | Androgen receptor | AR |
| MOL002714 | baicalein | Heat shock protein HSP 90-alpha | HSP90AA1 |
| MOL002714 | baicalein | cAMP-dependent protein kinase catalytic subunit alpha | PRKACA |
| MOL002714 | baicalein | Dipeptidyl peptidase 4 | DPP4 |
| MOL002714 | baicalein | Trypsin-1 | PRSS1 |
| MOL002714 | baicalein | Nuclear receptor coactivator 2 | NCOA2 |
| MOL002714 | baicalein | Nuclear receptor coactivator 1 | NCOA1 |
| MOL002714 | baicalein | Transcription factor p65 | RELA |
| MOL002714 | baicalein | Apoptosis regulator Bcl-2 | BCL2 |
| MOL002714 | baicalein | Proto-oncogene c-Fos | FOS |
| MOL002714 | baicalein | Caspase-3 | CASP3 |
| MOL002714 | baicalein | Cellular tumor antigen p53 | TP63 |
| MOL002714 | baicalein | Hypoxia-inducible factor 1-alpha | HIF1A |
| MOL002714 | baicalein | Fos-related antigen 1 | FOSL1 |
| MOL002714 | baicalein | G2/mitotic-specific cyclin-B1 | CCNB1 |
| MOL002714 | baicalein | Aryl hydrocarbon receptor | AHR |
| MOL002714 | baicalein | Insulin-like growth factor II | IGF2 |
| MOL002714 | baicalein | Cytochrome c | CYCS |
| MOL002714 | baicalein | NADPH oxidase 5 | NOX5 |
| MOL002714 | baicalein | Apolipoprotein D | APOD |
| MOL002776 | Baicalin | Coagulation factor X | F10 |
| MOL000358 | beta-sitosterol | Progesterone receptor | PGR |
| MOL000358 | beta-sitosterol | Nuclear receptor coactivator 2 | NCOA2 |
| MOL000358 | beta-sitosterol | Prostaglandin G/H synthase 1 | PTGS1 |
| MOL000358 | beta-sitosterol | Heat shock protein HSP 90-alpha | HSP90AA1 |
| MOL000358 | beta-sitosterol | cAMP-dependent protein kinase catalytic subunit alpha | PRKACA |
| MOL000358 | beta-sitosterol | Muscarinic acetylcholine receptor M3 | CHRM3 |
| MOL000358 | beta-sitosterol | Muscarinic acetylcholine receptor M1 | CHRM1 |
| MOL000358 | beta-sitosterol | Muscarinic acetylcholine receptor M4 | CHRM4 |
| MOL000358 | beta-sitosterol | Alpha-1A adrenergic receptor | ADRA1A |
| MOL000358 | beta-sitosterol | Muscarinic acetylcholine receptor M2 | CHRM2 |
| MOL000358 | beta-sitosterol | Neuronal acetylcholine receptor subunit alpha-2 | CHRNA2 |
| MOL000358 | beta-sitosterol | Neuronal acetylcholine receptor subunit alpha-7 | CHRNA7 |
| MOL000358 | beta-sitosterol | Apoptosis regulator Bcl-2 | BCL2 |
| MOL000358 | beta-sitosterol | Caspase-9 | CASP9 |
| MOL000358 | beta-sitosterol | Caspase-3 | CASP3 |
| MOL000358 | beta-sitosterol | Caspase-8 | CASP8 |
| MOL000358 | beta-sitosterol | Protein kinase C alpha type | PRKCA |
| MOL000358 | beta-sitosterol | Serum paraoxonase/arylesterase 1 | PON1 |
| MOL000359 | sitosterol | Progesterone receptor | PGR |
| MOL000359 | sitosterol | Nuclear receptor coactivator 2 | NCOA2 |
| MOL000359 | sitosterol | Mineralocorticoid receptor | NR3C2 |
| MOL004355 | Spinasterol | Progesterone receptor | PGR |
| MOL004355 | Spinasterol | Mineralocorticoid receptor | NR3C2 |
| MOL004355 | Spinasterol | Nuclear receptor coactivator 2 | NCOA2 |
| MOL000449 | Stigmasterol | Progesterone receptor | PGR |
| MOL000449 | Stigmasterol | Mineralocorticoid receptor | NR3C2 |
| MOL000449 | Stigmasterol | Nuclear receptor coactivator 2 | NCOA2 |
| MOL000449 | Stigmasterol | Nuclear receptor coactivator 1 | NCOA1 |
| MOL000449 | Stigmasterol | Prostaglandin G/H synthase 1 | PTGS1 |
| MOL000449 | Stigmasterol | Aldose reductase | AKR1B1 |
| MOL000449 | Stigmasterol | Urokinase-type plasminogen activator | PLAU |
| MOL000449 | Stigmasterol | cAMP-dependent protein kinase catalytic subunit alpha | PRKACA |
| MOL000449 | Stigmasterol | Chymotrypsinogen B | CTRB1 |
| MOL000449 | Stigmasterol | Muscarinic acetylcholine receptor M3 | CHRM3 |
| MOL000449 | Stigmasterol | Muscarinic acetylcholine receptor M1 | CHRM1 |
| MOL000449 | Stigmasterol | Alpha-1A adrenergic receptor | ADRA1A |
| MOL000449 | Stigmasterol | Muscarinic acetylcholine receptor M2 | CHRM2 |
| MOL000449 | Stigmasterol | Neuronal acetylcholine receptor subunit alpha-7 | CHRNA7 |
| MOL000492 | (+)-catechin | Prostaglandin G/H synthase 1 | PTGS1 |
| MOL000492 | (+)-catechin | Estrogen receptor | ESR1 |
| MOL000492 | (+)-catechin | Heat shock protein HSP 90-alpha | HSP90AA1 |
| MOL000492 | (+)-catechin | cAMP-dependent protein kinase catalytic subunit alpha | PRKACA |
| MOL000492 | (+)-catechin | Nuclear receptor coactivator 2 | NCOA2 |
| MOL006992 | (2R,3R)-4-methoxyl-distylin | Prostaglandin G/H synthase 1 | PTGS1 |
| MOL006992 | (2R,3R)-4-methoxyl-distylin | Estrogen receptor | ESR1 |
| MOL006992 | (2R,3R)-4-methoxyl-distylin | Heat shock protein HSP 90-alpha | HSP90AA1 |
| MOL006999 | stigmast-7-en-3-ol | Progesterone receptor | PGR |
| MOL002883 | Ethyl oleate (NF) | Nuclear receptor coactivator 2 | NCOA2 |
| MOL005043 | campest-5-en-3beta-ol | Progesterone receptor | PGR |
| MOL013381 | Marmin | Carbonic anhydrase 2 | CA2 |
| MOL002341 | Hesperetin | Prostaglandin G/H synthase 1 | PTGS1 |
| MOL002341 | Hesperetin | Heat shock protein HSP 90-alpha | HSP90AA1 |
| MOL002341 | Hesperetin | cAMP-dependent protein kinase catalytic subunit alpha | PRKACA |
| MOL002341 | Hesperetin | Nuclear receptor coactivator 2 | NCOA2 |
| MOL002341 | Hesperetin | Nuclear receptor coactivator 1 | NCOA1 |
| MOL000358 | beta-sitosterol | Progesterone receptor | PGR |
| MOL000358 | beta-sitosterol | Nuclear receptor coactivator 2 | NCOA2 |
| MOL000358 | beta-sitosterol | Prostaglandin G/H synthase 1 | PTGS1 |
| MOL000358 | beta-sitosterol | Heat shock protein HSP 90-alpha | HSP90AA1 |
| MOL000358 | beta-sitosterol | cAMP-dependent protein kinase catalytic subunit alpha | PRKACA |
| MOL000358 | beta-sitosterol | Muscarinic acetylcholine receptor M3 | CHRM3 |
| MOL000358 | beta-sitosterol | Muscarinic acetylcholine receptor M1 | CHRM1 |
| MOL000358 | beta-sitosterol | Muscarinic acetylcholine receptor M4 | CHRM4 |
| MOL000358 | beta-sitosterol | Alpha-1A adrenergic receptor | ADRA1A |
| MOL000358 | beta-sitosterol | Muscarinic acetylcholine receptor M2 | CHRM2 |
| MOL000358 | beta-sitosterol | Neuronal acetylcholine receptor subunit alpha-2 | CHRNA2 |
| MOL000358 | beta-sitosterol | Neuronal acetylcholine receptor subunit alpha-7 | CHRNA7 |
| MOL000358 | beta-sitosterol | Apoptosis regulator Bcl-2 | BCL2 |
| MOL000358 | beta-sitosterol | Caspase-9 | CASP9 |
| MOL000358 | beta-sitosterol | Caspase-3 | CASP3 |
| MOL000358 | beta-sitosterol | Caspase-8 | CASP8 |
| MOL000358 | beta-sitosterol | Protein kinase C alpha type | PRKCA |
| MOL000358 | beta-sitosterol | Serum paraoxonase/arylesterase 1 | PON1 |
| MOL004328 | naringenin | Prostaglandin G/H synthase 1 | PTGS1 |
| MOL004328 | naringenin | Estrogen receptor | ESR1 |
| MOL004328 | naringenin | Heat shock protein HSP 90-alpha | HSP90AA1 |
| MOL004328 | naringenin | cAMP-dependent protein kinase catalytic subunit alpha | PRKACA |
| MOL004328 | naringenin | Transcription factor p65 | RELA |
| MOL004328 | naringenin | Apoptosis regulator Bcl-2 | BCL2 |
| MOL004328 | naringenin | Caspase-3 | CASP3 |
| MOL004328 | naringenin | Fatty acid synthase | FASN |
| MOL004328 | naringenin | Low-density lipoprotein receptor | LDLR |
| MOL004328 | naringenin | Peroxisome proliferator-activated receptor gamma | PPARG |
| MOL004328 | naringenin | Microsomal triglyceride transfer protein large subunit | MTTP |
| MOL004328 | naringenin | Apolipoprotein B-100 | APOB |
| MOL004328 | naringenin | Sterol regulatory element-binding protein 1 | SREBF1 |
| MOL004328 | naringenin | Multidrug resistance-associated protein 1 | ABCC1 |
| MOL004328 | naringenin | Aldo-keto reductase family 1 member C1 | AKR1C1 |
| MOL005828 | nobiletin | Prostaglandin G/H synthase 1 | PTGS1 |
| MOL005828 | nobiletin | Prothrombin | F2 |
| MOL005828 | nobiletin | Estrogen receptor | ESR1 |
| MOL005828 | nobiletin | Androgen receptor | AR |
| MOL005828 | nobiletin | Peroxisome proliferator-activated receptor gamma | PPARG |
| MOL005828 | nobiletin | Coagulation factor X | F10 |
| MOL005828 | nobiletin | Coagulation factor VII | F7 |
| MOL005828 | nobiletin | Estrogen receptor beta | ESR2 |
| MOL005828 | nobiletin | Dipeptidyl peptidase 4 | DPP4 |
| MOL005828 | nobiletin | Heat shock protein HSP 90-alpha | HSP90AA1 |
| MOL005828 | nobiletin | Serine/threonine-protein kinase Chk1 | CHEK1 |
| MOL005828 | nobiletin | Trypsin-1 | PRSS1 |
| MOL005828 | nobiletin | Nuclear receptor coactivator 2 | NCOA2 |
| MOL005828 | nobiletin | Glycogen synthase kinase-3 beta | GSK3B |
| MOL005828 | nobiletin | Apoptosis regulator Bcl-2 | BCL2 |
| MOL005828 | nobiletin | Caspase-9 | CASP9 |
| MOL005828 | nobiletin | Cellular tumor antigen p53 | TP63 |
| MOL005828 | nobiletin | Mitogen-activated protein kinase 8 | MAPK8 |
| MOL005828 | nobiletin | Metalloproteinase inhibitor 1 | TIMP1 |
| MOL005828 | nobiletin | Peroxisome proliferator-activated receptor gamma | PPARG |
| MOL005828 | nobiletin | Scavenger receptor cysteine-rich type 1 protein M130 | CD163 |
| MOL005828 | nobiletin | Ephrin type-B receptor 2 | EPHB2 |
| MOL001004 | pelargonidin | Prostaglandin G/H synthase 1 | PTGS1 |
| MOL001004 | pelargonidin | Androgen receptor | AR |
| MOL001004 | pelargonidin | Peroxisome proliferator-activated receptor gamma | PPARG |
| MOL001004 | pelargonidin | Carbonic anhydrase 2 | CA2 |
| MOL001004 | pelargonidin | Heat shock protein HSP 90-alpha | HSP90AA1 |
| MOL001004 | pelargonidin | cAMP-dependent protein kinase catalytic subunit alpha | PRKACA |
| MOL001004 | pelargonidin | Nuclear receptor coactivator 2 | NCOA2 |
| MOL001004 | pelargonidin | Acetylcholinesterase | ACHE |
| MOL001004 | pelargonidin | Progesterone receptor | PGR |
| MOL001004 | pelargonidin | Mineralocorticoid receptor | NR3C2 |
| MOL001004 | pelargonidin | Glucocorticoid receptor | NR3C1 |
| MOL001004 | pelargonidin | Nuclear receptor coactivator 1 | NCOA1 |
| MOL000358 | beta-sitosterol | Progesterone receptor | PGR |
| MOL000358 | beta-sitosterol | Nuclear receptor coactivator 2 | NCOA2 |
| MOL000358 | beta-sitosterol | Prostaglandin G/H synthase 1 | PTGS1 |
| MOL000358 | beta-sitosterol | Heat shock protein HSP 90-alpha | HSP90AA1 |
| MOL000358 | beta-sitosterol | cAMP-dependent protein kinase catalytic subunit alpha | PRKACA |
| MOL000358 | beta-sitosterol | Muscarinic acetylcholine receptor M3 | CHRM3 |
| MOL000358 | beta-sitosterol | Muscarinic acetylcholine receptor M1 | CHRM1 |
| MOL000358 | beta-sitosterol | Muscarinic acetylcholine receptor M4 | CHRM4 |
| MOL000358 | beta-sitosterol | Alpha-1A adrenergic receptor | ADRA1A |
| MOL000358 | beta-sitosterol | Muscarinic acetylcholine receptor M2 | CHRM2 |
| MOL000358 | beta-sitosterol | Neuronal acetylcholine receptor subunit alpha-2 | CHRNA2 |
| MOL000358 | beta-sitosterol | Neuronal acetylcholine receptor subunit alpha-7 | CHRNA7 |
| MOL000358 | beta-sitosterol | Apoptosis regulator Bcl-2 | BCL2 |
| MOL000358 | beta-sitosterol | Caspase-9 | CASP9 |
| MOL000358 | beta-sitosterol | Caspase-3 | CASP3 |
| MOL000358 | beta-sitosterol | Caspase-8 | CASP8 |
| MOL000358 | beta-sitosterol | Protein kinase C alpha type | PRKCA |
| MOL000358 | beta-sitosterol | Serum paraoxonase/arylesterase 1 | PON1 |
| MOL004440 | Peimisine | Mineralocorticoid receptor | NR3C2 |
| MOL004440 | Peimisine | Glucocorticoid receptor | NR3C1 |
| MOL004443 | Zhebeiresinol | Prostaglandin G/H synthase 1 | PTGS1 |
| MOL004443 | Zhebeiresinol | Heat shock protein HSP 90-alpha | HSP90AA1 |
| MOL004446 | 6-Methoxyl-2-acetyl-3-methyl-1,4-naphthoquinone-8-O-beta-D-glucopyranoside | Estrogen receptor | ESR1 |
| MOL004446 | 6-Methoxyl-2-acetyl-3-methyl-1,4-naphthoquinone-8-O-beta-D-glucopyranoside | Coagulation factor X | F10 |
| MOL004446 | 6-Methoxyl-2-acetyl-3-methyl-1,4-naphthoquinone-8-O-beta-D-glucopyranoside | Carbonic anhydrase 2 | CA2 |
| MOL004446 | 6-Methoxyl-2-acetyl-3-methyl-1,4-naphthoquinone-8-O-beta-D-glucopyranoside | Heat shock protein HSP 90-alpha | HSP90AA1 |
| MOL004446 | 6-Methoxyl-2-acetyl-3-methyl-1,4-naphthoquinone-8-O-beta-D-glucopyranoside | Nuclear receptor coactivator 2 | NCOA2 |
| MOL001484 | Inermine | Prostaglandin G/H synthase 1 | PTGS1 |
| MOL001484 | Inermine | Muscarinic acetylcholine receptor M3 | CHRM3 |
| MOL001484 | Inermine | cAMP-dependent protein kinase catalytic subunit alpha | PRKACA |
| MOL001484 | Inermine | Trypsin-1 | PRSS1 |
| MOL001484 | Inermine | Muscarinic acetylcholine receptor M1 | CHRM1 |
| MOL001484 | Inermine | Heat shock protein HSP 90-alpha | HSP90AA1 |
| MOL001792 | DFV | Prostaglandin G/H synthase 1 | PTGS1 |
| MOL001792 | DFV | Estrogen receptor | ESR1 |
| MOL001792 | DFV | Heat shock protein HSP 90-alpha | HSP90AA1 |
| MOL001792 | DFV | cAMP-dependent protein kinase catalytic subunit alpha | PRKACA |
| MOL000211 | Mairin | Progesterone receptor | PGR |
| MOL002311 | Glycyrol | Estrogen receptor | ESR1 |
| MOL002311 | Glycyrol | Peroxisome proliferator-activated receptor gamma | PPARG |
| MOL002311 | Glycyrol | Glycogen synthase kinase-3 beta | GSK3B |
| MOL002311 | Glycyrol | Serine/threonine-protein kinase Chk1 | CHEK1 |
| MOL002311 | Glycyrol | Prothrombin | F2 |
| MOL000239 | Jaranol | Prostaglandin G/H synthase 1 | PTGS1 |
| MOL000239 | Jaranol | Androgen receptor | AR |
| MOL000239 | Jaranol | Estrogen receptor beta | ESR2 |
| MOL000239 | Jaranol | Dipeptidyl peptidase 4 | DPP4 |
| MOL000239 | Jaranol | Heat shock protein HSP 90-alpha | HSP90AA1 |
| MOL000239 | Jaranol | Serine/threonine-protein kinase Chk1 | CHEK1 |
| MOL000239 | Jaranol | Trypsin-1 | PRSS1 |
| MOL000239 | Jaranol | Nuclear receptor coactivator 2 | NCOA2 |
| MOL002565 | Medicarpin | Prostaglandin G/H synthase 1 | PTGS1 |
| MOL002565 | Medicarpin | Muscarinic acetylcholine receptor M3 | CHRM3 |
| MOL002565 | Medicarpin | Muscarinic acetylcholine receptor M1 | CHRM1 |
| MOL002565 | Medicarpin | Estrogen receptor | ESR1 |
| MOL002565 | Medicarpin | Muscarinic acetylcholine receptor M5 | CHRM5 |
| MOL002565 | Medicarpin | Muscarinic acetylcholine receptor M4 | CHRM4 |
| MOL002565 | Medicarpin | Alpha-1A adrenergic receptor | ADRA1A |
| MOL002565 | Medicarpin | Muscarinic acetylcholine receptor M2 | CHRM2 |
| MOL002565 | Medicarpin | Estrogen receptor beta | ESR2 |
| MOL002565 | Medicarpin | Dipeptidyl peptidase 4 | DPP4 |
| MOL002565 | Medicarpin | Mitogen-activated protein kinase 10 | MAPK10 |
| MOL002565 | Medicarpin | Heat shock protein HSP 90-alpha | HSP90AA1 |
| MOL002565 | Medicarpin | Neuronal acetylcholine receptor subunit alpha-7 | CHRNA7 |
| MOL002565 | Medicarpin | cAMP-dependent protein kinase catalytic subunit alpha | PRKACA |
| MOL002565 | Medicarpin | Trypsin-1 | PRSS1 |
| MOL000354 | isorhamnetin | Prostaglandin G/H synthase 1 | PTGS1 |
| MOL000354 | isorhamnetin | Estrogen receptor | ESR1 |
| MOL000354 | isorhamnetin | Androgen receptor | AR |
| MOL000354 | isorhamnetin | Peroxisome proliferator-activated receptor gamma | PPARG |
| MOL000354 | isorhamnetin | Estrogen receptor beta | ESR2 |
| MOL000354 | isorhamnetin | Dipeptidyl peptidase 4 | DPP4 |
| MOL000354 | isorhamnetin | Glycogen synthase kinase-3 beta | GSK3B |
| MOL000354 | isorhamnetin | Heat shock protein HSP 90-alpha | HSP90AA1 |
| MOL000354 | isorhamnetin | cAMP-dependent protein kinase catalytic subunit alpha | PRKACA |
| MOL000354 | isorhamnetin | Trypsin-1 | PRSS1 |
| MOL000354 | isorhamnetin | Nuclear receptor coactivator 2 | NCOA2 |
| MOL000354 | isorhamnetin | Serine/threonine-protein kinase Chk1 | CHEK1 |
| MOL000354 | isorhamnetin | Aldose reductase | AKR1B1 |
| MOL000354 | isorhamnetin | Nuclear receptor coactivator 1 | NCOA1 |
| MOL000354 | isorhamnetin | Coagulation factor VII | F7 |
| MOL000354 | isorhamnetin | Prothrombin | F2 |
| MOL000354 | isorhamnetin | Acetylcholinesterase | ACHE |
| MOL000354 | isorhamnetin | Glutamate receptor 2 | GRIA2 |
| MOL000354 | isorhamnetin | Transcription factor p65 | RELA |
| MOL000354 | isorhamnetin | Oxidized low-density lipoprotein receptor 1 | OLR1 |
| MOL000359 | sitosterol | Progesterone receptor | PGR |
| MOL000359 | sitosterol | Nuclear receptor coactivator 2 | NCOA2 |
| MOL000359 | sitosterol | Mineralocorticoid receptor | NR3C2 |
| MOL003656 | Lupiwighteone | Prothrombin | F2 |
| MOL003656 | Lupiwighteone | Estrogen receptor | ESR1 |
| MOL003656 | Lupiwighteone | Androgen receptor | AR |
| MOL003656 | Lupiwighteone | Peroxisome proliferator-activated receptor gamma | PPARG |
| MOL003656 | Lupiwighteone | Coagulation factor X | F10 |
| MOL003656 | Lupiwighteone | Estrogen receptor beta | ESR2 |
| MOL003656 | Lupiwighteone | Dipeptidyl peptidase 4 | DPP4 |
| MOL003656 | Lupiwighteone | Glycogen synthase kinase-3 beta | GSK3B |
| MOL003656 | Lupiwighteone | Heat shock protein HSP 90-alpha | HSP90AA1 |
| MOL003656 | Lupiwighteone | Serine/threonine-protein kinase Chk1 | CHEK1 |
| MOL003656 | Lupiwighteone | Trypsin-1 | PRSS1 |
| MOL003656 | Lupiwighteone | Nuclear receptor coactivator 2 | NCOA2 |
| MOL003896 | 7-Methoxy-2-methyl isoflavone | Prostaglandin G/H synthase 1 | PTGS1 |
| MOL003896 | 7-Methoxy-2-methyl isoflavone | Muscarinic acetylcholine receptor M3 | CHRM3 |
| MOL003896 | 7-Methoxy-2-methyl isoflavone | Prothrombin | F2 |
| MOL003896 | 7-Methoxy-2-methyl isoflavone | Muscarinic acetylcholine receptor M1 | CHRM1 |
| MOL003896 | 7-Methoxy-2-methyl isoflavone | Estrogen receptor | ESR1 |
| MOL003896 | 7-Methoxy-2-methyl isoflavone | Androgen receptor | AR |
| MOL003896 | 7-Methoxy-2-methyl isoflavone | Peroxisome proliferator-activated receptor gamma | PPARG |
| MOL003896 | 7-Methoxy-2-methyl isoflavone | Acetylcholinesterase | ACHE |
| MOL003896 | 7-Methoxy-2-methyl isoflavone | Estrogen receptor beta | ESR2 |
| MOL003896 | 7-Methoxy-2-methyl isoflavone | Dipeptidyl peptidase 4 | DPP4 |
| MOL003896 | 7-Methoxy-2-methyl isoflavone | Glycogen synthase kinase-3 beta | GSK3B |
| MOL003896 | 7-Methoxy-2-methyl isoflavone | Heat shock protein HSP 90-alpha | HSP90AA1 |
| MOL003896 | 7-Methoxy-2-methyl isoflavone | Neuronal acetylcholine receptor subunit alpha-7 | CHRNA7 |
| MOL003896 | 7-Methoxy-2-methyl isoflavone | Serine/threonine-protein kinase Chk1 | CHEK1 |
| MOL003896 | 7-Methoxy-2-methyl isoflavone | cAMP-dependent protein kinase catalytic subunit alpha | PRKACA |
| MOL003896 | 7-Methoxy-2-methyl isoflavone | Trypsin-1 | PRSS1 |
| MOL003896 | 7-Methoxy-2-methyl isoflavone | Nuclear receptor coactivator 1 | NCOA1 |
| MOL003896 | 7-Methoxy-2-methyl isoflavone | Muscarinic acetylcholine receptor M5 | CHRM5 |
| MOL003896 | 7-Methoxy-2-methyl isoflavone | Nuclear receptor coactivator 2 | NCOA2 |
| MOL000392 | formononetin | Prostaglandin G/H synthase 1 | PTGS1 |
| MOL000392 | formononetin | Muscarinic acetylcholine receptor M1 | CHRM1 |
| MOL000392 | formononetin | Estrogen receptor | ESR1 |
| MOL000392 | formononetin | Androgen receptor | AR |
| MOL000392 | formononetin | Peroxisome proliferator-activated receptor gamma | PPARG |
| MOL000392 | formononetin | Alpha-1A adrenergic receptor | ADRA1A |
| MOL000392 | formononetin | Estrogen receptor beta | ESR2 |
| MOL000392 | formononetin | Dipeptidyl peptidase 4 | DPP4 |
| MOL000392 | formononetin | Glycogen synthase kinase-3 beta | GSK3B |
| MOL000392 | formononetin | Heat shock protein HSP 90-alpha | HSP90AA1 |
| MOL000392 | formononetin | Serine/threonine-protein kinase Chk1 | CHEK1 |
| MOL000392 | formononetin | cAMP-dependent protein kinase catalytic subunit alpha | PRKACA |
| MOL000392 | formononetin | Trypsin-1 | PRSS1 |
| MOL000392 | formononetin | Prothrombin | F2 |
| MOL000392 | formononetin | Acetylcholinesterase | ACHE |
| MOL000392 | formononetin | Peroxisome proliferator-activated receptor gamma | PPARG |
| MOL000417 | Calycosin | Prostaglandin G/H synthase 1 | PTGS1 |
| MOL000417 | Calycosin | Estrogen receptor | ESR1 |
| MOL000417 | Calycosin | Androgen receptor | AR |
| MOL000417 | Calycosin | Peroxisome proliferator-activated receptor gamma | PPARG |
| MOL000417 | Calycosin | Estrogen receptor beta | ESR2 |
| MOL000417 | Calycosin | Dipeptidyl peptidase 4 | DPP4 |
| MOL000417 | Calycosin | Glycogen synthase kinase-3 beta | GSK3B |
| MOL000417 | Calycosin | Heat shock protein HSP 90-alpha | HSP90AA1 |
| MOL000417 | Calycosin | Serine/threonine-protein kinase Chk1 | CHEK1 |
| MOL000417 | Calycosin | cAMP-dependent protein kinase catalytic subunit alpha | PRKACA |
| MOL000417 | Calycosin | Trypsin-1 | PRSS1 |
| MOL000417 | Calycosin | Nuclear receptor coactivator 2 | NCOA2 |
| MOL000422 | kaempferol | Prostaglandin G/H synthase 1 | PTGS1 |
| MOL000422 | kaempferol | Androgen receptor | AR |
| MOL000422 | kaempferol | Peroxisome proliferator-activated receptor gamma | PPARG |
| MOL000422 | kaempferol | Heat shock protein HSP 90-alpha | HSP90AA1 |
| MOL000422 | kaempferol | cAMP-dependent protein kinase catalytic subunit alpha | PRKACA |
| MOL000422 | kaempferol | Nuclear receptor coactivator 2 | NCOA2 |
| MOL000422 | kaempferol | Dipeptidyl peptidase 4 | DPP4 |
| MOL000422 | kaempferol | Trypsin-1 | PRSS1 |
| MOL000422 | kaempferol | Progesterone receptor | PGR |
| MOL000422 | kaempferol | Prothrombin | F2 |
| MOL000422 | kaempferol | Muscarinic acetylcholine receptor M1 | CHRM1 |
| MOL000422 | kaempferol | Acetylcholinesterase | ACHE |
| MOL000422 | kaempferol | Muscarinic acetylcholine receptor M2 | CHRM2 |
| MOL000422 | kaempferol | Coagulation factor VII | F7 |
| MOL000422 | kaempferol | Transcription factor p65 | RELA |
| MOL000422 | kaempferol | Inhibitor of nuclear factor kappa-B kinase subunit beta | IKBKB |
| MOL000422 | kaempferol | Apoptosis regulator Bcl-2 | BCL2 |
| MOL000422 | kaempferol | Activator of 90 kDa heat shock protein ATPase homolog 1 | AHSA1 |
| MOL000422 | kaempferol | Caspase-3 | CASP3 |
| MOL000422 | kaempferol | Mitogen-activated protein kinase 8 | MAPK8 |
| MOL000422 | kaempferol | Peroxisome proliferator-activated receptor gamma | PPARG |
| MOL000422 | kaempferol | Cytochrome P450 3A4 | CYP3A4 |
| MOL000422 | kaempferol | Cytochrome P450 1A1 | CYP1A1 |
| MOL000422 | kaempferol | Intercellular adhesion molecule 1 | ICAM1 |
| MOL000422 | kaempferol | E-selectin | SELE |
| MOL000422 | kaempferol | Vascular cell adhesion protein 1 | VCAM1 |
| MOL000422 | kaempferol | Cytochrome P450 1B1 | CYP1B1 |
| MOL000422 | kaempferol | Arachidonate 5-lipoxygenase | ALOX5 |
| MOL000422 | kaempferol | Aryl hydrocarbon receptor | AHR |
| MOL000422 | kaempferol | 26S proteasome non-ATPase regulatory subunit 3 | PSMD3 |
| MOL000422 | kaempferol | Nuclear receptor subfamily 1 group I member 3 | NR1I3 |
| MOL000422 | kaempferol | Type I iodothyronine deiodinase | DIO1 |
| MOL000422 | kaempferol | Glutathione S-transferase Mu 1 | GSTM1 |
| MOL000422 | kaempferol | Glutathione S-transferase Mu 2 | GSTM2 |
| MOL000422 | kaempferol | Aldo-keto reductase family 1 member C3 | AKR1C3 |
| MOL004328 | naringenin | Prostaglandin G/H synthase 1 | PTGS1 |
| MOL004328 | naringenin | Estrogen receptor | ESR1 |
| MOL004328 | naringenin | Heat shock protein HSP 90-alpha | HSP90AA1 |
| MOL004328 | naringenin | cAMP-dependent protein kinase catalytic subunit alpha | PRKACA |
| MOL004328 | naringenin | Transcription factor p65 | RELA |
| MOL004328 | naringenin | Apoptosis regulator Bcl-2 | BCL2 |
| MOL004328 | naringenin | Caspase-3 | CASP3 |
| MOL004328 | naringenin | Fatty acid synthase | FASN |
| MOL004328 | naringenin | Low-density lipoprotein receptor | LDLR |
| MOL004328 | naringenin | Peroxisome proliferator-activated receptor gamma | PPARG |
| MOL004328 | naringenin | Microsomal triglyceride transfer protein large subunit | MTTP |
| MOL004328 | naringenin | Apolipoprotein B-100 | APOB |
| MOL004328 | naringenin | Sterol regulatory element-binding protein 1 | SREBF1 |
| MOL004328 | naringenin | Multidrug resistance-associated protein 1 | ABCC1 |
| MOL004328 | naringenin | Aldo-keto reductase family 1 member C1 | AKR1C1 |
| MOL004805 | (2S)-2-[4-hydroxy-3-(3-methylbut-2-enyl)phenyl]-8,8-dimethyl-2,3-dihydropyrano[2,3-f]chromen-4-one | Estrogen receptor | ESR1 |
| MOL004805 | (2S)-2-[4-hydroxy-3-(3-methylbut-2-enyl)phenyl]-8,8-dimethyl-2,3-dihydropyrano[2,3-f]chromen-4-one | Androgen receptor | AR |
| MOL004805 | (2S)-2-[4-hydroxy-3-(3-methylbut-2-enyl)phenyl]-8,8-dimethyl-2,3-dihydropyrano[2,3-f]chromen-4-one | Peroxisome proliferator-activated receptor gamma | PPARG |
| MOL004805 | (2S)-2-[4-hydroxy-3-(3-methylbut-2-enyl)phenyl]-8,8-dimethyl-2,3-dihydropyrano[2,3-f]chromen-4-one | Coagulation factor X | F10 |
| MOL004805 | (2S)-2-[4-hydroxy-3-(3-methylbut-2-enyl)phenyl]-8,8-dimethyl-2,3-dihydropyrano[2,3-f]chromen-4-one | Estrogen receptor beta | ESR2 |
| MOL004805 | (2S)-2-[4-hydroxy-3-(3-methylbut-2-enyl)phenyl]-8,8-dimethyl-2,3-dihydropyrano[2,3-f]chromen-4-one | Glycogen synthase kinase-3 beta | GSK3B |
| MOL004806 | euchrenone | Estrogen receptor | ESR1 |
| MOL004806 | euchrenone | Coagulation factor X | F10 |
| MOL004806 | euchrenone | Estrogen receptor beta | ESR2 |
| MOL004806 | euchrenone | Beta-secretase 1 | BACE1 |
| MOL004808 | glyasperin B | Prothrombin | F2 |
| MOL004808 | glyasperin B | Estrogen receptor | ESR1 |
| MOL004808 | glyasperin B | Androgen receptor | AR |
| MOL004808 | glyasperin B | Peroxisome proliferator-activated receptor gamma | PPARG |
| MOL004808 | glyasperin B | Coagulation factor X | F10 |
| MOL004808 | glyasperin B | Coagulation factor VII | F7 |
| MOL004808 | glyasperin B | Acetylcholinesterase | ACHE |
| MOL004808 | glyasperin B | Estrogen receptor beta | ESR2 |
| MOL004808 | glyasperin B | Dipeptidyl peptidase 4 | DPP4 |
| MOL004808 | glyasperin B | Glycogen synthase kinase-3 beta | GSK3B |
| MOL004808 | glyasperin B | Heat shock protein HSP 90-alpha | HSP90AA1 |
| MOL004808 | glyasperin B | Trypsin-1 | PRSS1 |
| MOL004808 | glyasperin B | Nuclear receptor coactivator 2 | NCOA2 |
| MOL004810 | glyasperin F | Prostaglandin G/H synthase 1 | PTGS1 |
| MOL004810 | glyasperin F | Estrogen receptor | ESR1 |
| MOL004810 | glyasperin F | Androgen receptor | AR |
| MOL004810 | glyasperin F | Peroxisome proliferator-activated receptor gamma | PPARG |
| MOL004810 | glyasperin F | Coagulation factor X | F10 |
| MOL004810 | glyasperin F | Estrogen receptor beta | ESR2 |
| MOL004810 | glyasperin F | Glycogen synthase kinase-3 beta | GSK3B |
| MOL004810 | glyasperin F | Heat shock protein HSP 90-alpha | HSP90AA1 |
| MOL004810 | glyasperin F | Trypsin-1 | PRSS1 |
| MOL004811 | Glyasperin C | Prothrombin | F2 |
| MOL004811 | Glyasperin C | Estrogen receptor | ESR1 |
| MOL004811 | Glyasperin C | Androgen receptor | AR |
| MOL004811 | Glyasperin C | Peroxisome proliferator-activated receptor gamma | PPARG |
| MOL004811 | Glyasperin C | Coagulation factor X | F10 |
| MOL004811 | Glyasperin C | Acetylcholinesterase | ACHE |
| MOL004811 | Glyasperin C | Estrogen receptor beta | ESR2 |
| MOL004811 | Glyasperin C | Dipeptidyl peptidase 4 | DPP4 |
| MOL004811 | Glyasperin C | Glycogen synthase kinase-3 beta | GSK3B |
| MOL004811 | Glyasperin C | Heat shock protein HSP 90-alpha | HSP90AA1 |
| MOL004811 | Glyasperin C | Serine/threonine-protein kinase Chk1 | CHEK1 |
| MOL004811 | Glyasperin C | Trypsin-1 | PRSS1 |
| MOL004811 | Glyasperin C | Nuclear receptor coactivator 2 | NCOA2 |
| MOL004814 | Isotrifoliol | Estrogen receptor | ESR1 |
| MOL004814 | Isotrifoliol | Androgen receptor | AR |
| MOL004814 | Isotrifoliol | Estrogen receptor beta | ESR2 |
| MOL004814 | Isotrifoliol | Glycogen synthase kinase-3 beta | GSK3B |
| MOL004814 | Isotrifoliol | Heat shock protein HSP 90-alpha | HSP90AA1 |
| MOL004814 | Isotrifoliol | Serine/threonine-protein kinase Chk1 | CHEK1 |
| MOL004814 | Isotrifoliol | cAMP-dependent protein kinase catalytic subunit alpha | PRKACA |
| MOL004815 | (E)-1-(2,4-dihydroxyphenyl)-3-(2,2-dimethylchromen-6-yl)prop-2-en-1-one | Prostaglandin G/H synthase 1 | PTGS1 |
| MOL004815 | (E)-1-(2,4-dihydroxyphenyl)-3-(2,2-dimethylchromen-6-yl)prop-2-en-1-one | Estrogen receptor | ESR1 |
| MOL004815 | (E)-1-(2,4-dihydroxyphenyl)-3-(2,2-dimethylchromen-6-yl)prop-2-en-1-one | Androgen receptor | AR |
| MOL004815 | (E)-1-(2,4-dihydroxyphenyl)-3-(2,2-dimethylchromen-6-yl)prop-2-en-1-one | Peroxisome proliferator-activated receptor gamma | PPARG |
| MOL004815 | (E)-1-(2,4-dihydroxyphenyl)-3-(2,2-dimethylchromen-6-yl)prop-2-en-1-one | Coagulation factor X | F10 |
| MOL004815 | (E)-1-(2,4-dihydroxyphenyl)-3-(2,2-dimethylchromen-6-yl)prop-2-en-1-one | Carbonic anhydrase 2 | CA2 |
| MOL004815 | (E)-1-(2,4-dihydroxyphenyl)-3-(2,2-dimethylchromen-6-yl)prop-2-en-1-one | Estrogen receptor beta | ESR2 |
| MOL004815 | (E)-1-(2,4-dihydroxyphenyl)-3-(2,2-dimethylchromen-6-yl)prop-2-en-1-one | Glycogen synthase kinase-3 beta | GSK3B |
| MOL004815 | (E)-1-(2,4-dihydroxyphenyl)-3-(2,2-dimethylchromen-6-yl)prop-2-en-1-one | Serine/threonine-protein kinase Chk1 | CHEK1 |
| MOL004815 | (E)-1-(2,4-dihydroxyphenyl)-3-(2,2-dimethylchromen-6-yl)prop-2-en-1-one | Nuclear receptor coactivator 2 | NCOA2 |
| MOL004820 | kanzonols W | Prostaglandin G/H synthase 1 | PTGS1 |
| MOL004820 | kanzonols W | Estrogen receptor | ESR1 |
| MOL004820 | kanzonols W | Androgen receptor | AR |
| MOL004820 | kanzonols W | Peroxisome proliferator-activated receptor gamma | PPARG |
| MOL004820 | kanzonols W | Coagulation factor X | F10 |
| MOL004820 | kanzonols W | Estrogen receptor beta | ESR2 |
| MOL004820 | kanzonols W | Glycogen synthase kinase-3 beta | GSK3B |
| MOL004820 | kanzonols W | Serine/threonine-protein kinase Chk1 | CHEK1 |
| MOL004820 | kanzonols W | Trypsin-1 | PRSS1 |
| MOL004820 | kanzonols W | Nuclear receptor coactivator 2 | NCOA2 |
| MOL004820 | kanzonols W | Nuclear receptor coactivator 1 | NCOA1 |
| MOL004824 | (2S)-6-(2,4-dihydroxyphenyl)-2-(2-hydroxypropan-2-yl)-4-methoxy-2,3-dihydrofuro[3,2-g]chromen-7-one | Prothrombin | F2 |
| MOL004824 | (2S)-6-(2,4-dihydroxyphenyl)-2-(2-hydroxypropan-2-yl)-4-methoxy-2,3-dihydrofuro[3,2-g]chromen-7-one | Estrogen receptor | ESR1 |
| MOL004824 | (2S)-6-(2,4-dihydroxyphenyl)-2-(2-hydroxypropan-2-yl)-4-methoxy-2,3-dihydrofuro[3,2-g]chromen-7-one | Androgen receptor | AR |
| MOL004824 | (2S)-6-(2,4-dihydroxyphenyl)-2-(2-hydroxypropan-2-yl)-4-methoxy-2,3-dihydrofuro[3,2-g]chromen-7-one | Peroxisome proliferator-activated receptor gamma | PPARG |
| MOL004824 | (2S)-6-(2,4-dihydroxyphenyl)-2-(2-hydroxypropan-2-yl)-4-methoxy-2,3-dihydrofuro[3,2-g]chromen-7-one | Coagulation factor X | F10 |
| MOL004824 | (2S)-6-(2,4-dihydroxyphenyl)-2-(2-hydroxypropan-2-yl)-4-methoxy-2,3-dihydrofuro[3,2-g]chromen-7-one | Coagulation factor VII | F7 |
| MOL004824 | (2S)-6-(2,4-dihydroxyphenyl)-2-(2-hydroxypropan-2-yl)-4-methoxy-2,3-dihydrofuro[3,2-g]chromen-7-one | Acetylcholinesterase | ACHE |
| MOL004824 | (2S)-6-(2,4-dihydroxyphenyl)-2-(2-hydroxypropan-2-yl)-4-methoxy-2,3-dihydrofuro[3,2-g]chromen-7-one | Estrogen receptor beta | ESR2 |
| MOL004824 | (2S)-6-(2,4-dihydroxyphenyl)-2-(2-hydroxypropan-2-yl)-4-methoxy-2,3-dihydrofuro[3,2-g]chromen-7-one | Dipeptidyl peptidase 4 | DPP4 |
| MOL004824 | (2S)-6-(2,4-dihydroxyphenyl)-2-(2-hydroxypropan-2-yl)-4-methoxy-2,3-dihydrofuro[3,2-g]chromen-7-one | Glycogen synthase kinase-3 beta | GSK3B |
| MOL004824 | (2S)-6-(2,4-dihydroxyphenyl)-2-(2-hydroxypropan-2-yl)-4-methoxy-2,3-dihydrofuro[3,2-g]chromen-7-one | Serine/threonine-protein kinase Chk1 | CHEK1 |
| MOL004824 | (2S)-6-(2,4-dihydroxyphenyl)-2-(2-hydroxypropan-2-yl)-4-methoxy-2,3-dihydrofuro[3,2-g]chromen-7-one | Trypsin-1 | PRSS1 |
| MOL004827 | Semilicoisoflavone B | Prothrombin | F2 |
| MOL004827 | Semilicoisoflavone B | Estrogen receptor | ESR1 |
| MOL004827 | Semilicoisoflavone B | Androgen receptor | AR |
| MOL004827 | Semilicoisoflavone B | Peroxisome proliferator-activated receptor gamma | PPARG |
| MOL004827 | Semilicoisoflavone B | Coagulation factor X | F10 |
| MOL004827 | Semilicoisoflavone B | Coagulation factor VII | F7 |
| MOL004827 | Semilicoisoflavone B | Acetylcholinesterase | ACHE |
| MOL004827 | Semilicoisoflavone B | Glycogen synthase kinase-3 beta | GSK3B |
| MOL004827 | Semilicoisoflavone B | Heat shock protein HSP 90-alpha | HSP90AA1 |
| MOL004827 | Semilicoisoflavone B | Serine/threonine-protein kinase Chk1 | CHEK1 |
| MOL004827 | Semilicoisoflavone B | Trypsin-1 | PRSS1 |
| MOL004828 | Glepidotin A | Prostaglandin G/H synthase 1 | PTGS1 |
| MOL004828 | Glepidotin A | Prothrombin | F2 |
| MOL004828 | Glepidotin A | Estrogen receptor | ESR1 |
| MOL004828 | Glepidotin A | Androgen receptor | AR |
| MOL004828 | Glepidotin A | Peroxisome proliferator-activated receptor gamma | PPARG |
| MOL004828 | Glepidotin A | Coagulation factor X | F10 |
| MOL004828 | Glepidotin A | Coagulation factor VII | F7 |
| MOL004828 | Glepidotin A | Dipeptidyl peptidase 4 | DPP4 |
| MOL004828 | Glepidotin A | Glycogen synthase kinase-3 beta | GSK3B |
| MOL004828 | Glepidotin A | Heat shock protein HSP 90-alpha | HSP90AA1 |
| MOL004828 | Glepidotin A | Serine/threonine-protein kinase Chk1 | CHEK1 |
| MOL004828 | Glepidotin A | Trypsin-1 | PRSS1 |
| MOL004829 | Glepidotin B | Prostaglandin G/H synthase 1 | PTGS1 |
| MOL004829 | Glepidotin B | Estrogen receptor | ESR1 |
| MOL004829 | Glepidotin B | Coagulation factor X | F10 |
| MOL004829 | Glepidotin B | Coagulation factor VII | F7 |
| MOL004829 | Glepidotin B | Heat shock protein HSP 90-alpha | HSP90AA1 |
| MOL004829 | Glepidotin B | Nuclear receptor coactivator 1 | NCOA1 |
| MOL004833 | Phaseolinisoflavan | Muscarinic acetylcholine receptor M1 | CHRM1 |
| MOL004833 | Phaseolinisoflavan | Estrogen receptor | ESR1 |
| MOL004833 | Phaseolinisoflavan | Androgen receptor | AR |
| MOL004833 | Phaseolinisoflavan | Peroxisome proliferator-activated receptor gamma | PPARG |
| MOL004833 | Phaseolinisoflavan | Coagulation factor X | F10 |
| MOL004833 | Phaseolinisoflavan | Acetylcholinesterase | ACHE |
| MOL004833 | Phaseolinisoflavan | Estrogen receptor beta | ESR2 |
| MOL004833 | Phaseolinisoflavan | Glycogen synthase kinase-3 beta | GSK3B |
| MOL004833 | Phaseolinisoflavan | Serine/threonine-protein kinase Chk1 | CHEK1 |
| MOL004833 | Phaseolinisoflavan | Trypsin-1 | PRSS1 |
| MOL004833 | Phaseolinisoflavan | Nuclear receptor coactivator 1 | NCOA1 |
| MOL004835 | Glypallichalcone | Prostaglandin G/H synthase 1 | PTGS1 |
| MOL004835 | Glypallichalcone | Muscarinic acetylcholine receptor M1 | CHRM1 |
| MOL004835 | Glypallichalcone | Estrogen receptor | ESR1 |
| MOL004835 | Glypallichalcone | Androgen receptor | AR |
| MOL004835 | Glypallichalcone | Peroxisome proliferator-activated receptor gamma | PPARG |
| MOL004835 | Glypallichalcone | Carbonic anhydrase 2 | CA2 |
| MOL004835 | Glypallichalcone | Estrogen receptor beta | ESR2 |
| MOL004835 | Glypallichalcone | Glycogen synthase kinase-3 beta | GSK3B |
| MOL004835 | Glypallichalcone | Heat shock protein HSP 90-alpha | HSP90AA1 |
| MOL004835 | Glypallichalcone | Serine/threonine-protein kinase Chk1 | CHEK1 |
| MOL004835 | Glypallichalcone | cAMP-dependent protein kinase catalytic subunit alpha | PRKACA |
| MOL004835 | Glypallichalcone | Nuclear receptor coactivator 1 | NCOA1 |
| MOL004838 | 8-(6-hydroxy-2-benzofuranyl)-2,2-dimethyl-5-chromenol | Estrogen receptor | ESR1 |
| MOL004838 | 8-(6-hydroxy-2-benzofuranyl)-2,2-dimethyl-5-chromenol | Heat shock protein HSP 90-alpha | HSP90AA1 |
| MOL004841 | Licochalcone B | Prostaglandin G/H synthase 1 | PTGS1 |
| MOL004841 | Licochalcone B | Estrogen receptor | ESR1 |
| MOL004841 | Licochalcone B | Androgen receptor | AR |
| MOL004841 | Licochalcone B | Peroxisome proliferator-activated receptor gamma | PPARG |
| MOL004841 | Licochalcone B | Carbonic anhydrase 2 | CA2 |
| MOL004841 | Licochalcone B | Estrogen receptor beta | ESR2 |
| MOL004841 | Licochalcone B | Glycogen synthase kinase-3 beta | GSK3B |
| MOL004841 | Licochalcone B | Heat shock protein HSP 90-alpha | HSP90AA1 |
| MOL004841 | Licochalcone B | Serine/threonine-protein kinase Chk1 | CHEK1 |
| MOL004841 | Licochalcone B | cAMP-dependent protein kinase catalytic subunit alpha | PRKACA |
| MOL004848 | licochalcone G | Estrogen receptor | ESR1 |
| MOL004848 | licochalcone G | Androgen receptor | AR |
| MOL004848 | licochalcone G | Peroxisome proliferator-activated receptor gamma | PPARG |
| MOL004848 | licochalcone G | Coagulation factor X | F10 |
| MOL004848 | licochalcone G | Estrogen receptor beta | ESR2 |
| MOL004848 | licochalcone G | Glycogen synthase kinase-3 beta | GSK3B |
| MOL004848 | licochalcone G | Heat shock protein HSP 90-alpha | HSP90AA1 |
| MOL004848 | licochalcone G | Nuclear receptor coactivator 2 | NCOA2 |
| MOL004849 | 3-(2,4-dihydroxyphenyl)-8-(1,1-dimethylprop-2-enyl)-7-hydroxy-5-methoxy-coumarin | Prothrombin | F2 |
| MOL004849 | 3-(2,4-dihydroxyphenyl)-8-(1,1-dimethylprop-2-enyl)-7-hydroxy-5-methoxy-coumarin | Estrogen receptor | ESR1 |
| MOL004849 | 3-(2,4-dihydroxyphenyl)-8-(1,1-dimethylprop-2-enyl)-7-hydroxy-5-methoxy-coumarin | Androgen receptor | AR |
| MOL004849 | 3-(2,4-dihydroxyphenyl)-8-(1,1-dimethylprop-2-enyl)-7-hydroxy-5-methoxy-coumarin | Peroxisome proliferator-activated receptor gamma | PPARG |
| MOL004849 | 3-(2,4-dihydroxyphenyl)-8-(1,1-dimethylprop-2-enyl)-7-hydroxy-5-methoxy-coumarin | Coagulation factor X | F10 |
| MOL004849 | 3-(2,4-dihydroxyphenyl)-8-(1,1-dimethylprop-2-enyl)-7-hydroxy-5-methoxy-coumarin | Coagulation factor VII | F7 |
| MOL004849 | 3-(2,4-dihydroxyphenyl)-8-(1,1-dimethylprop-2-enyl)-7-hydroxy-5-methoxy-coumarin | Estrogen receptor beta | ESR2 |
| MOL004849 | 3-(2,4-dihydroxyphenyl)-8-(1,1-dimethylprop-2-enyl)-7-hydroxy-5-methoxy-coumarin | Dipeptidyl peptidase 4 | DPP4 |
| MOL004849 | 3-(2,4-dihydroxyphenyl)-8-(1,1-dimethylprop-2-enyl)-7-hydroxy-5-methoxy-coumarin | Glycogen synthase kinase-3 beta | GSK3B |
| MOL004849 | 3-(2,4-dihydroxyphenyl)-8-(1,1-dimethylprop-2-enyl)-7-hydroxy-5-methoxy-coumarin | Heat shock protein HSP 90-alpha | HSP90AA1 |
| MOL004849 | 3-(2,4-dihydroxyphenyl)-8-(1,1-dimethylprop-2-enyl)-7-hydroxy-5-methoxy-coumarin | Serine/threonine-protein kinase Chk1 | CHEK1 |
| MOL004849 | 3-(2,4-dihydroxyphenyl)-8-(1,1-dimethylprop-2-enyl)-7-hydroxy-5-methoxy-coumarin | Trypsin-1 | PRSS1 |
| MOL004849 | 3-(2,4-dihydroxyphenyl)-8-(1,1-dimethylprop-2-enyl)-7-hydroxy-5-methoxy-coumarin | Nuclear receptor coactivator 2 | NCOA2 |
| MOL004849 | 3-(2,4-dihydroxyphenyl)-8-(1,1-dimethylprop-2-enyl)-7-hydroxy-5-methoxy-coumarin | Nuclear receptor coactivator 1 | NCOA1 |
| MOL004855 | Licoricone | Prothrombin | F2 |
| MOL004855 | Licoricone | Estrogen receptor | ESR1 |
| MOL004855 | Licoricone | Androgen receptor | AR |
| MOL004855 | Licoricone | Peroxisome proliferator-activated receptor gamma | PPARG |
| MOL004855 | Licoricone | Coagulation factor X | F10 |
| MOL004855 | Licoricone | Serine/threonine-protein kinase Chk1 | CHEK1 |
| MOL004855 | Licoricone | Trypsin-1 | PRSS1 |
| MOL004855 | Licoricone | Nuclear receptor coactivator 2 | NCOA2 |
| MOL004856 | Gancaonin A | Prothrombin | F2 |
| MOL004856 | Gancaonin A | Estrogen receptor | ESR1 |
| MOL004856 | Gancaonin A | Androgen receptor | AR |
| MOL004856 | Gancaonin A | Peroxisome proliferator-activated receptor gamma | PPARG |
| MOL004856 | Gancaonin A | Coagulation factor X | F10 |
| MOL004856 | Gancaonin A | Acetylcholinesterase | ACHE |
| MOL004856 | Gancaonin A | Estrogen receptor beta | ESR2 |
| MOL004856 | Gancaonin A | Dipeptidyl peptidase 4 | DPP4 |
| MOL004856 | Gancaonin A | Glycogen synthase kinase-3 beta | GSK3B |
| MOL004856 | Gancaonin A | Heat shock protein HSP 90-alpha | HSP90AA1 |
| MOL004856 | Gancaonin A | Serine/threonine-protein kinase Chk1 | CHEK1 |
| MOL004856 | Gancaonin A | Trypsin-1 | PRSS1 |
| MOL004856 | Gancaonin A | Nuclear receptor coactivator 2 | NCOA2 |
| MOL004857 | Gancaonin B | Prothrombin | F2 |
| MOL004857 | Gancaonin B | Estrogen receptor | ESR1 |
| MOL004857 | Gancaonin B | Androgen receptor | AR |
| MOL004857 | Gancaonin B | Peroxisome proliferator-activated receptor gamma | PPARG |
| MOL004857 | Gancaonin B | Coagulation factor X | F10 |
| MOL004857 | Gancaonin B | Coagulation factor VII | F7 |
| MOL004857 | Gancaonin B | Estrogen receptor beta | ESR2 |
| MOL004857 | Gancaonin B | Dipeptidyl peptidase 4 | DPP4 |
| MOL004857 | Gancaonin B | Glycogen synthase kinase-3 beta | GSK3B |
| MOL004857 | Gancaonin B | Heat shock protein HSP 90-alpha | HSP90AA1 |
| MOL004857 | Gancaonin B | Serine/threonine-protein kinase Chk1 | CHEK1 |
| MOL004857 | Gancaonin B | Trypsin-1 | PRSS1 |
| MOL004857 | Gancaonin B | Nuclear receptor coactivator 2 | NCOA2 |
| MOL004863 | 3-(3,4-dihydroxyphenyl)-5,7-dihydroxy-8-(3-methylbut-2-enyl)chromone | Prothrombin | F2 |
| MOL004863 | 3-(3,4-dihydroxyphenyl)-5,7-dihydroxy-8-(3-methylbut-2-enyl)chromone | Estrogen receptor | ESR1 |
| MOL004863 | 3-(3,4-dihydroxyphenyl)-5,7-dihydroxy-8-(3-methylbut-2-enyl)chromone | Androgen receptor | AR |
| MOL004863 | 3-(3,4-dihydroxyphenyl)-5,7-dihydroxy-8-(3-methylbut-2-enyl)chromone | Peroxisome proliferator-activated receptor gamma | PPARG |
| MOL004863 | 3-(3,4-dihydroxyphenyl)-5,7-dihydroxy-8-(3-methylbut-2-enyl)chromone | Coagulation factor X | F10 |
| MOL004863 | 3-(3,4-dihydroxyphenyl)-5,7-dihydroxy-8-(3-methylbut-2-enyl)chromone | Glycogen synthase kinase-3 beta | GSK3B |
| MOL004863 | 3-(3,4-dihydroxyphenyl)-5,7-dihydroxy-8-(3-methylbut-2-enyl)chromone | Heat shock protein HSP 90-alpha | HSP90AA1 |
| MOL004863 | 3-(3,4-dihydroxyphenyl)-5,7-dihydroxy-8-(3-methylbut-2-enyl)chromone | Serine/threonine-protein kinase Chk1 | CHEK1 |
| MOL004863 | 3-(3,4-dihydroxyphenyl)-5,7-dihydroxy-8-(3-methylbut-2-enyl)chromone | Trypsin-1 | PRSS1 |
| MOL004863 | 3-(3,4-dihydroxyphenyl)-5,7-dihydroxy-8-(3-methylbut-2-enyl)chromone | Nuclear receptor coactivator 2 | NCOA2 |
| MOL004864 | 5,7-dihydroxy-3-(4-methoxyphenyl)-8-(3-methylbut-2-enyl)chromone | Estrogen receptor | ESR1 |
| MOL004864 | 5,7-dihydroxy-3-(4-methoxyphenyl)-8-(3-methylbut-2-enyl)chromone | Androgen receptor | AR |
| MOL004864 | 5,7-dihydroxy-3-(4-methoxyphenyl)-8-(3-methylbut-2-enyl)chromone | Peroxisome proliferator-activated receptor gamma | PPARG |
| MOL004864 | 5,7-dihydroxy-3-(4-methoxyphenyl)-8-(3-methylbut-2-enyl)chromone | Coagulation factor X | F10 |
| MOL004864 | 5,7-dihydroxy-3-(4-methoxyphenyl)-8-(3-methylbut-2-enyl)chromone | Estrogen receptor beta | ESR2 |
| MOL004864 | 5,7-dihydroxy-3-(4-methoxyphenyl)-8-(3-methylbut-2-enyl)chromone | Dipeptidyl peptidase 4 | DPP4 |
| MOL004864 | 5,7-dihydroxy-3-(4-methoxyphenyl)-8-(3-methylbut-2-enyl)chromone | Glycogen synthase kinase-3 beta | GSK3B |
| MOL004864 | 5,7-dihydroxy-3-(4-methoxyphenyl)-8-(3-methylbut-2-enyl)chromone | Heat shock protein HSP 90-alpha | HSP90AA1 |
| MOL004864 | 5,7-dihydroxy-3-(4-methoxyphenyl)-8-(3-methylbut-2-enyl)chromone | Serine/threonine-protein kinase Chk1 | CHEK1 |
| MOL004864 | 5,7-dihydroxy-3-(4-methoxyphenyl)-8-(3-methylbut-2-enyl)chromone | Trypsin-1 | PRSS1 |
| MOL004864 | 5,7-dihydroxy-3-(4-methoxyphenyl)-8-(3-methylbut-2-enyl)chromone | Nuclear receptor coactivator 2 | NCOA2 |
| MOL004866 | 2-(3,4-dihydroxyphenyl)-5,7-dihydroxy-6-(3-methylbut-2-enyl)chromone | Prothrombin | F2 |
| MOL004866 | 2-(3,4-dihydroxyphenyl)-5,7-dihydroxy-6-(3-methylbut-2-enyl)chromone | Androgen receptor | AR |
| MOL004866 | 2-(3,4-dihydroxyphenyl)-5,7-dihydroxy-6-(3-methylbut-2-enyl)chromone | Peroxisome proliferator-activated receptor gamma | PPARG |
| MOL004866 | 2-(3,4-dihydroxyphenyl)-5,7-dihydroxy-6-(3-methylbut-2-enyl)chromone | Coagulation factor X | F10 |
| MOL004866 | 2-(3,4-dihydroxyphenyl)-5,7-dihydroxy-6-(3-methylbut-2-enyl)chromone | Coagulation factor VII | F7 |
| MOL004866 | 2-(3,4-dihydroxyphenyl)-5,7-dihydroxy-6-(3-methylbut-2-enyl)chromone | Dipeptidyl peptidase 4 | DPP4 |
| MOL004866 | 2-(3,4-dihydroxyphenyl)-5,7-dihydroxy-6-(3-methylbut-2-enyl)chromone | Heat shock protein HSP 90-alpha | HSP90AA1 |
| MOL004866 | 2-(3,4-dihydroxyphenyl)-5,7-dihydroxy-6-(3-methylbut-2-enyl)chromone | Serine/threonine-protein kinase Chk1 | CHEK1 |
| MOL004866 | 2-(3,4-dihydroxyphenyl)-5,7-dihydroxy-6-(3-methylbut-2-enyl)chromone | Trypsin-1 | PRSS1 |
| MOL004879 | Glycyrin | Prothrombin | F2 |
| MOL004879 | Glycyrin | Estrogen receptor | ESR1 |
| MOL004879 | Glycyrin | Androgen receptor | AR |
| MOL004879 | Glycyrin | Peroxisome proliferator-activated receptor gamma | PPARG |
| MOL004879 | Glycyrin | Coagulation factor X | F10 |
| MOL004879 | Glycyrin | Estrogen receptor beta | ESR2 |
| MOL004879 | Glycyrin | Dipeptidyl peptidase 4 | DPP4 |
| MOL004879 | Glycyrin | Serine/threonine-protein kinase Chk1 | CHEK1 |
| MOL004879 | Glycyrin | Trypsin-1 | PRSS1 |
| MOL004879 | Glycyrin | Nuclear receptor coactivator 2 | NCOA2 |
| MOL004882 | Licocoumarone | Estrogen receptor | ESR1 |
| MOL004882 | Licocoumarone | Androgen receptor | AR |
| MOL004882 | Licocoumarone | Estrogen receptor beta | ESR2 |
| MOL004882 | Licocoumarone | Glycogen synthase kinase-3 beta | GSK3B |
| MOL004882 | Licocoumarone | Heat shock protein HSP 90-alpha | HSP90AA1 |
| MOL004883 | Licoisoflavone | Prothrombin | F2 |
| MOL004883 | Licoisoflavone | Estrogen receptor | ESR1 |
| MOL004883 | Licoisoflavone | Androgen receptor | AR |
| MOL004883 | Licoisoflavone | Peroxisome proliferator-activated receptor gamma | PPARG |
| MOL004883 | Licoisoflavone | Coagulation factor X | F10 |
| MOL004883 | Licoisoflavone | Dipeptidyl peptidase 4 | DPP4 |
| MOL004883 | Licoisoflavone | Heat shock protein HSP 90-alpha | HSP90AA1 |
| MOL004883 | Licoisoflavone | Serine/threonine-protein kinase Chk1 | CHEK1 |
| MOL004883 | Licoisoflavone | Trypsin-1 | PRSS1 |
| MOL004883 | Licoisoflavone | Nuclear receptor coactivator 2 | NCOA2 |
| MOL004884 | Licoisoflavone B | Prothrombin | F2 |
| MOL004884 | Licoisoflavone B | Estrogen receptor | ESR1 |
| MOL004884 | Licoisoflavone B | Androgen receptor | AR |
| MOL004884 | Licoisoflavone B | Peroxisome proliferator-activated receptor gamma | PPARG |
| MOL004884 | Licoisoflavone B | Coagulation factor X | F10 |
| MOL004884 | Licoisoflavone B | Acetylcholinesterase | ACHE |
| MOL004884 | Licoisoflavone B | Estrogen receptor beta | ESR2 |
| MOL004884 | Licoisoflavone B | Glycogen synthase kinase-3 beta | GSK3B |
| MOL004884 | Licoisoflavone B | Serine/threonine-protein kinase Chk1 | CHEK1 |
| MOL004884 | Licoisoflavone B | Trypsin-1 | PRSS1 |
| MOL004885 | licoisoflavanone | Prostaglandin G/H synthase 1 | PTGS1 |
| MOL004885 | licoisoflavanone | Estrogen receptor | ESR1 |
| MOL004885 | licoisoflavanone | Androgen receptor | AR |
| MOL004885 | licoisoflavanone | Peroxisome proliferator-activated receptor gamma | PPARG |
| MOL004885 | licoisoflavanone | Coagulation factor X | F10 |
| MOL004885 | licoisoflavanone | Coagulation factor VII | F7 |
| MOL004885 | licoisoflavanone | Acetylcholinesterase | ACHE |
| MOL004885 | licoisoflavanone | Estrogen receptor beta | ESR2 |
| MOL004885 | licoisoflavanone | Glycogen synthase kinase-3 beta | GSK3B |
| MOL004885 | licoisoflavanone | Heat shock protein HSP 90-alpha | HSP90AA1 |
| MOL004885 | licoisoflavanone | Trypsin-1 | PRSS1 |
| MOL004885 | licoisoflavanone | Nuclear receptor coactivator 1 | NCOA1 |
| MOL004891 | shinpterocarpin | Prostaglandin G/H synthase 1 | PTGS1 |
| MOL004891 | shinpterocarpin | Muscarinic acetylcholine receptor M3 | CHRM3 |
| MOL004891 | shinpterocarpin | Muscarinic acetylcholine receptor M1 | CHRM1 |
| MOL004891 | shinpterocarpin | Estrogen receptor | ESR1 |
| MOL004891 | shinpterocarpin | Androgen receptor | AR |
| MOL004891 | shinpterocarpin | Peroxisome proliferator-activated receptor gamma | PPARG |
| MOL004891 | shinpterocarpin | Estrogen receptor beta | ESR2 |
| MOL004891 | shinpterocarpin | Glycogen synthase kinase-3 beta | GSK3B |
| MOL004891 | shinpterocarpin | Neuronal acetylcholine receptor subunit alpha-7 | CHRNA7 |
| MOL004891 | shinpterocarpin | cAMP-dependent protein kinase catalytic subunit alpha | PRKACA |
| MOL004891 | shinpterocarpin | Trypsin-1 | PRSS1 |
| MOL004891 | shinpterocarpin | Nuclear receptor coactivator 1 | NCOA1 |
| MOL004898 | (E)-3-[3,4-dihydroxy-5-(3-methylbut-2-enyl)phenyl]-1-(2,4-dihydroxyphenyl)prop-2-en-1-one | Estrogen receptor | ESR1 |
| MOL004898 | (E)-3-[3,4-dihydroxy-5-(3-methylbut-2-enyl)phenyl]-1-(2,4-dihydroxyphenyl)prop-2-en-1-one | Androgen receptor | AR |
| MOL004898 | (E)-3-[3,4-dihydroxy-5-(3-methylbut-2-enyl)phenyl]-1-(2,4-dihydroxyphenyl)prop-2-en-1-one | Peroxisome proliferator-activated receptor gamma | PPARG |
| MOL004898 | (E)-3-[3,4-dihydroxy-5-(3-methylbut-2-enyl)phenyl]-1-(2,4-dihydroxyphenyl)prop-2-en-1-one | Glycogen synthase kinase-3 beta | GSK3B |
| MOL004898 | (E)-3-[3,4-dihydroxy-5-(3-methylbut-2-enyl)phenyl]-1-(2,4-dihydroxyphenyl)prop-2-en-1-one | Heat shock protein HSP 90-alpha | HSP90AA1 |
| MOL004898 | (E)-3-[3,4-dihydroxy-5-(3-methylbut-2-enyl)phenyl]-1-(2,4-dihydroxyphenyl)prop-2-en-1-one | Nuclear receptor coactivator 2 | NCOA2 |
| MOL004903 | liquiritin | Coagulation factor X | F10 |
| MOL004903 | liquiritin | Coagulation factor VII | F7 |
| MOL004904 | licopyranocoumarin | Prothrombin | F2 |
| MOL004904 | licopyranocoumarin | Estrogen receptor | ESR1 |
| MOL004904 | licopyranocoumarin | Androgen receptor | AR |
| MOL004904 | licopyranocoumarin | Peroxisome proliferator-activated receptor gamma | PPARG |
| MOL004904 | licopyranocoumarin | Coagulation factor X | F10 |
| MOL004904 | licopyranocoumarin | Coagulation factor VII | F7 |
| MOL004904 | licopyranocoumarin | Acetylcholinesterase | ACHE |
| MOL004904 | licopyranocoumarin | Trypsin-1 | PRSS1 |
| MOL004907 | Glyzaglabrin | Prostaglandin G/H synthase 1 | PTGS1 |
| MOL004907 | Glyzaglabrin | Estrogen receptor | ESR1 |
| MOL004907 | Glyzaglabrin | Androgen receptor | AR |
| MOL004907 | Glyzaglabrin | Peroxisome proliferator-activated receptor gamma | PPARG |
| MOL004907 | Glyzaglabrin | Estrogen receptor beta | ESR2 |
| MOL004907 | Glyzaglabrin | Dipeptidyl peptidase 4 | DPP4 |
| MOL004907 | Glyzaglabrin | Glycogen synthase kinase-3 beta | GSK3B |
| MOL004907 | Glyzaglabrin | Heat shock protein HSP 90-alpha | HSP90AA1 |
| MOL004907 | Glyzaglabrin | Serine/threonine-protein kinase Chk1 | CHEK1 |
| MOL004907 | Glyzaglabrin | cAMP-dependent protein kinase catalytic subunit alpha | PRKACA |
| MOL004907 | Glyzaglabrin | Trypsin-1 | PRSS1 |
| MOL004908 | Glabridin | Muscarinic acetylcholine receptor M1 | CHRM1 |
| MOL004908 | Glabridin | Estrogen receptor | ESR1 |
| MOL004908 | Glabridin | Androgen receptor | AR |
| MOL004908 | Glabridin | Peroxisome proliferator-activated receptor gamma | PPARG |
| MOL004908 | Glabridin | Acetylcholinesterase | ACHE |
| MOL004908 | Glabridin | Estrogen receptor beta | ESR2 |
| MOL004908 | Glabridin | Glycogen synthase kinase-3 beta | GSK3B |
| MOL004908 | Glabridin | Serine/threonine-protein kinase Chk1 | CHEK1 |
| MOL004908 | Glabridin | cAMP-dependent protein kinase catalytic subunit alpha | PRKACA |
| MOL004908 | Glabridin | Trypsin-1 | PRSS1 |
| MOL004908 | Glabridin | Nuclear receptor coactivator 2 | NCOA2 |
| MOL004908 | Glabridin | Nuclear receptor coactivator 1 | NCOA1 |
| MOL004910 | Glabranin | Prostaglandin G/H synthase 1 | PTGS1 |
| MOL004910 | Glabranin | Estrogen receptor | ESR1 |
| MOL004910 | Glabranin | Coagulation factor X | F10 |
| MOL004910 | Glabranin | Heat shock protein HSP 90-alpha | HSP90AA1 |
| MOL004910 | Glabranin | cAMP-dependent protein kinase catalytic subunit alpha | PRKACA |
| MOL004911 | Glabrene | Prostaglandin G/H synthase 1 | PTGS1 |
| MOL004911 | Glabrene | Estrogen receptor | ESR1 |
| MOL004911 | Glabrene | Androgen receptor | AR |
| MOL004911 | Glabrene | Peroxisome proliferator-activated receptor gamma | PPARG |
| MOL004911 | Glabrene | Coagulation factor X | F10 |
| MOL004911 | Glabrene | Estrogen receptor beta | ESR2 |
| MOL004911 | Glabrene | Glycogen synthase kinase-3 beta | GSK3B |
| MOL004911 | Glabrene | Heat shock protein HSP 90-alpha | HSP90AA1 |
| MOL004911 | Glabrene | Trypsin-1 | PRSS1 |
| MOL004911 | Glabrene | Nuclear receptor coactivator 2 | NCOA2 |
| MOL004912 | Glabrone | Prostaglandin G/H synthase 1 | PTGS1 |
| MOL004912 | Glabrone | Prothrombin | F2 |
| MOL004912 | Glabrone | Estrogen receptor | ESR1 |
| MOL004912 | Glabrone | Androgen receptor | AR |
| MOL004912 | Glabrone | Peroxisome proliferator-activated receptor gamma | PPARG |
| MOL004912 | Glabrone | Coagulation factor X | F10 |
| MOL004912 | Glabrone | Acetylcholinesterase | ACHE |
| MOL004912 | Glabrone | Estrogen receptor beta | ESR2 |
| MOL004912 | Glabrone | Dipeptidyl peptidase 4 | DPP4 |
| MOL004912 | Glabrone | Glycogen synthase kinase-3 beta | GSK3B |
| MOL004912 | Glabrone | Serine/threonine-protein kinase Chk1 | CHEK1 |
| MOL004912 | Glabrone | Trypsin-1 | PRSS1 |
| MOL004913 | 1,3-dihydroxy-9-methoxy-6-benzofurano[3,2-c]chromenone | Estrogen receptor | ESR1 |
| MOL004913 | 1,3-dihydroxy-9-methoxy-6-benzofurano[3,2-c]chromenone | Peroxisome proliferator-activated receptor gamma | PPARG |
| MOL004913 | 1,3-dihydroxy-9-methoxy-6-benzofurano[3,2-c]chromenone | Estrogen receptor beta | ESR2 |
| MOL004913 | 1,3-dihydroxy-9-methoxy-6-benzofurano[3,2-c]chromenone | Glycogen synthase kinase-3 beta | GSK3B |
| MOL004913 | 1,3-dihydroxy-9-methoxy-6-benzofurano[3,2-c]chromenone | Heat shock protein HSP 90-alpha | HSP90AA1 |
| MOL004913 | 1,3-dihydroxy-9-methoxy-6-benzofurano[3,2-c]chromenone | Serine/threonine-protein kinase Chk1 | CHEK1 |
| MOL004913 | 1,3-dihydroxy-9-methoxy-6-benzofurano[3,2-c]chromenone | cAMP-dependent protein kinase catalytic subunit alpha | PRKACA |
| MOL004914 | 1,3-dihydroxy-8,9-dimethoxy-6-benzofurano[3,2-c]chromenone | Estrogen receptor | ESR1 |
| MOL004914 | 1,3-dihydroxy-8,9-dimethoxy-6-benzofurano[3,2-c]chromenone | Androgen receptor | AR |
| MOL004914 | 1,3-dihydroxy-8,9-dimethoxy-6-benzofurano[3,2-c]chromenone | Peroxisome proliferator-activated receptor gamma | PPARG |
| MOL004914 | 1,3-dihydroxy-8,9-dimethoxy-6-benzofurano[3,2-c]chromenone | Glycogen synthase kinase-3 beta | GSK3B |
| MOL004914 | 1,3-dihydroxy-8,9-dimethoxy-6-benzofurano[3,2-c]chromenone | Heat shock protein HSP 90-alpha | HSP90AA1 |
| MOL004914 | 1,3-dihydroxy-8,9-dimethoxy-6-benzofurano[3,2-c]chromenone | Serine/threonine-protein kinase Chk1 | CHEK1 |
| MOL004914 | 1,3-dihydroxy-8,9-dimethoxy-6-benzofurano[3,2-c]chromenone | cAMP-dependent protein kinase catalytic subunit alpha | PRKACA |
| MOL004915 | Eurycarpin A | Prothrombin | F2 |
| MOL004915 | Eurycarpin A | Estrogen receptor | ESR1 |
| MOL004915 | Eurycarpin A | Androgen receptor | AR |
| MOL004915 | Eurycarpin A | Peroxisome proliferator-activated receptor gamma | PPARG |
| MOL004915 | Eurycarpin A | Coagulation factor X | F10 |
| MOL004915 | Eurycarpin A | Estrogen receptor beta | ESR2 |
| MOL004915 | Eurycarpin A | Dipeptidyl peptidase 4 | DPP4 |
| MOL004915 | Eurycarpin A | Glycogen synthase kinase-3 beta | GSK3B |
| MOL004915 | Eurycarpin A | Heat shock protein HSP 90-alpha | HSP90AA1 |
| MOL004915 | Eurycarpin A | Serine/threonine-protein kinase Chk1 | CHEK1 |
| MOL004915 | Eurycarpin A | Trypsin-1 | PRSS1 |
| MOL004924 | (-)-Medicocarpin | Acetylcholinesterase | ACHE |
| MOL004935 | Sigmoidin-B | Estrogen receptor | ESR1 |
| MOL004935 | Sigmoidin-B | Coagulation factor X | F10 |
| MOL004935 | Sigmoidin-B | Heat shock protein HSP 90-alpha | HSP90AA1 |
| MOL004941 | (2R)-7-hydroxy-2-(4-hydroxyphenyl)chroman-4-one | Prostaglandin G/H synthase 1 | PTGS1 |
| MOL004941 | (2R)-7-hydroxy-2-(4-hydroxyphenyl)chroman-4-one | Estrogen receptor | ESR1 |
| MOL004941 | (2R)-7-hydroxy-2-(4-hydroxyphenyl)chroman-4-one | Heat shock protein HSP 90-alpha | HSP90AA1 |
| MOL004941 | (2R)-7-hydroxy-2-(4-hydroxyphenyl)chroman-4-one | cAMP-dependent protein kinase catalytic subunit alpha | PRKACA |
| MOL004945 | (2S)-7-hydroxy-2-(4-hydroxyphenyl)-8-(3-methylbut-2-enyl)chroman-4-one | Prostaglandin G/H synthase 1 | PTGS1 |
| MOL004945 | (2S)-7-hydroxy-2-(4-hydroxyphenyl)-8-(3-methylbut-2-enyl)chroman-4-one | Estrogen receptor | ESR1 |
| MOL004945 | (2S)-7-hydroxy-2-(4-hydroxyphenyl)-8-(3-methylbut-2-enyl)chroman-4-one | Coagulation factor X | F10 |
| MOL004945 | (2S)-7-hydroxy-2-(4-hydroxyphenyl)-8-(3-methylbut-2-enyl)chroman-4-one | Estrogen receptor beta | ESR2 |
| MOL004945 | (2S)-7-hydroxy-2-(4-hydroxyphenyl)-8-(3-methylbut-2-enyl)chroman-4-one | Heat shock protein HSP 90-alpha | HSP90AA1 |
| MOL004948 | Isoglycyrol | Estrogen receptor | ESR1 |
| MOL004948 | Isoglycyrol | Androgen receptor | AR |
| MOL004948 | Isoglycyrol | Dipeptidyl peptidase 4 | DPP4 |
| MOL004948 | Isoglycyrol | Glycogen synthase kinase-3 beta | GSK3B |
| MOL004949 | Isolicoflavonol | Prothrombin | F2 |
| MOL004949 | Isolicoflavonol | Estrogen receptor | ESR1 |
| MOL004949 | Isolicoflavonol | Androgen receptor | AR |
| MOL004949 | Isolicoflavonol | Peroxisome proliferator-activated receptor gamma | PPARG |
| MOL004949 | Isolicoflavonol | Coagulation factor X | F10 |
| MOL004949 | Isolicoflavonol | Glycogen synthase kinase-3 beta | GSK3B |
| MOL004949 | Isolicoflavonol | Heat shock protein HSP 90-alpha | HSP90AA1 |
| MOL004949 | Isolicoflavonol | Trypsin-1 | PRSS1 |
| MOL004949 | Isolicoflavonol | Nuclear receptor coactivator 2 | NCOA2 |
| MOL004957 | HMO | Prostaglandin G/H synthase 1 | PTGS1 |
| MOL004957 | HMO | Muscarinic acetylcholine receptor M1 | CHRM1 |
| MOL004957 | HMO | Estrogen receptor | ESR1 |
| MOL004957 | HMO | Androgen receptor | AR |
| MOL004957 | HMO | Peroxisome proliferator-activated receptor gamma | PPARG |
| MOL004957 | HMO | Estrogen receptor beta | ESR2 |
| MOL004957 | HMO | Dipeptidyl peptidase 4 | DPP4 |
| MOL004957 | HMO | Glycogen synthase kinase-3 beta | GSK3B |
| MOL004957 | HMO | Serine/threonine-protein kinase Chk1 | CHEK1 |
| MOL004957 | HMO | cAMP-dependent protein kinase catalytic subunit alpha | PRKACA |
| MOL004957 | HMO | Trypsin-1 | PRSS1 |
| MOL004959 | 1-Methoxyphaseollidin | Prostaglandin G/H synthase 1 | PTGS1 |
| MOL004959 | 1-Methoxyphaseollidin | Prothrombin | F2 |
| MOL004959 | 1-Methoxyphaseollidin | Estrogen receptor | ESR1 |
| MOL004959 | 1-Methoxyphaseollidin | Androgen receptor | AR |
| MOL004959 | 1-Methoxyphaseollidin | Peroxisome proliferator-activated receptor gamma | PPARG |
| MOL004959 | 1-Methoxyphaseollidin | Coagulation factor X | F10 |
| MOL004959 | 1-Methoxyphaseollidin | Estrogen receptor beta | ESR2 |
| MOL004959 | 1-Methoxyphaseollidin | Glycogen synthase kinase-3 beta | GSK3B |
| MOL004959 | 1-Methoxyphaseollidin | Heat shock protein HSP 90-alpha | HSP90AA1 |
| MOL004959 | 1-Methoxyphaseollidin | Trypsin-1 | PRSS1 |
| MOL004959 | 1-Methoxyphaseollidin | Nuclear receptor coactivator 2 | NCOA2 |
| MOL004959 | 1-Methoxyphaseollidin | Nuclear receptor coactivator 1 | NCOA1 |
| MOL004961 | Quercetin der. | Prostaglandin G/H synthase 1 | PTGS1 |
| MOL004961 | Quercetin der. | Estrogen receptor | ESR1 |
| MOL004961 | Quercetin der. | Androgen receptor | AR |
| MOL004961 | Quercetin der. | Peroxisome proliferator-activated receptor gamma | PPARG |
| MOL004961 | Quercetin der. | Estrogen receptor beta | ESR2 |
| MOL004961 | Quercetin der. | Dipeptidyl peptidase 4 | DPP4 |
| MOL004961 | Quercetin der. | Glycogen synthase kinase-3 beta | GSK3B |
| MOL004961 | Quercetin der. | Heat shock protein HSP 90-alpha | HSP90AA1 |
| MOL004961 | Quercetin der. | Trypsin-1 | PRSS1 |
| MOL004961 | Quercetin der. | Nuclear receptor coactivator 2 | NCOA2 |
| MOL004966 | 3'-Hydroxy-4'-O-Methylglabridin | Prostaglandin G/H synthase 1 | PTGS1 |
| MOL004966 | 3'-Hydroxy-4'-O-Methylglabridin | Estrogen receptor | ESR1 |
| MOL004966 | 3'-Hydroxy-4'-O-Methylglabridin | Androgen receptor | AR |
| MOL004966 | 3'-Hydroxy-4'-O-Methylglabridin | Peroxisome proliferator-activated receptor gamma | PPARG |
| MOL004966 | 3'-Hydroxy-4'-O-Methylglabridin | Coagulation factor X | F10 |
| MOL004966 | 3'-Hydroxy-4'-O-Methylglabridin | Coagulation factor VII | F7 |
| MOL004966 | 3'-Hydroxy-4'-O-Methylglabridin | Estrogen receptor beta | ESR2 |
| MOL004966 | 3'-Hydroxy-4'-O-Methylglabridin | Glycogen synthase kinase-3 beta | GSK3B |
| MOL004966 | 3'-Hydroxy-4'-O-Methylglabridin | Heat shock protein HSP 90-alpha | HSP90AA1 |
| MOL004966 | 3'-Hydroxy-4'-O-Methylglabridin | Serine/threonine-protein kinase Chk1 | CHEK1 |
| MOL004966 | 3'-Hydroxy-4'-O-Methylglabridin | cAMP-dependent protein kinase catalytic subunit alpha | PRKACA |
| MOL004966 | 3'-Hydroxy-4'-O-Methylglabridin | Trypsin-1 | PRSS1 |
| MOL004966 | 3'-Hydroxy-4'-O-Methylglabridin | Nuclear receptor coactivator 2 | NCOA2 |
| MOL004966 | 3'-Hydroxy-4'-O-Methylglabridin | Nuclear receptor coactivator 1 | NCOA1 |
| MOL000497 | licochalcone a | Prostaglandin G/H synthase 1 | PTGS1 |
| MOL000497 | licochalcone a | Muscarinic acetylcholine receptor M1 | CHRM1 |
| MOL000497 | licochalcone a | Estrogen receptor | ESR1 |
| MOL000497 | licochalcone a | Androgen receptor | AR |
| MOL000497 | licochalcone a | Peroxisome proliferator-activated receptor gamma | PPARG |
| MOL000497 | licochalcone a | Coagulation factor X | F10 |
| MOL000497 | licochalcone a | Carbonic anhydrase 2 | CA2 |
| MOL000497 | licochalcone a | Estrogen receptor beta | ESR2 |
| MOL000497 | licochalcone a | Glycogen synthase kinase-3 beta | GSK3B |
| MOL000497 | licochalcone a | Heat shock protein HSP 90-alpha | HSP90AA1 |
| MOL000497 | licochalcone a | Serine/threonine-protein kinase Chk1 | CHEK1 |
| MOL000497 | licochalcone a | Nuclear receptor coactivator 2 | NCOA2 |
| MOL000497 | licochalcone a | Transcription factor p65 | RELA |
| MOL000497 | licochalcone a | G1/S-specific cyclin-D1 | CCND1 |
| MOL000497 | licochalcone a | Apoptosis regulator Bcl-2 | BCL2 |
| MOL000497 | licochalcone a | Eukaryotic translation initiation factor 6 | EIF6 |
| MOL000497 | licochalcone a | Retinoblastoma-associated protein | RB1 |
| MOL004974 | 3'-Methoxyglabridin | Prostaglandin G/H synthase 1 | PTGS1 |
| MOL004974 | 3'-Methoxyglabridin | Estrogen receptor | ESR1 |
| MOL004974 | 3'-Methoxyglabridin | Androgen receptor | AR |
| MOL004974 | 3'-Methoxyglabridin | Peroxisome proliferator-activated receptor gamma | PPARG |
| MOL004974 | 3'-Methoxyglabridin | Coagulation factor X | F10 |
| MOL004974 | 3'-Methoxyglabridin | Coagulation factor VII | F7 |
| MOL004974 | 3'-Methoxyglabridin | Acetylcholinesterase | ACHE |
| MOL004974 | 3'-Methoxyglabridin | Estrogen receptor beta | ESR2 |
| MOL004974 | 3'-Methoxyglabridin | Glycogen synthase kinase-3 beta | GSK3B |
| MOL004974 | 3'-Methoxyglabridin | Heat shock protein HSP 90-alpha | HSP90AA1 |
| MOL004974 | 3'-Methoxyglabridin | Serine/threonine-protein kinase Chk1 | CHEK1 |
| MOL004974 | 3'-Methoxyglabridin | Trypsin-1 | PRSS1 |
| MOL004974 | 3'-Methoxyglabridin | Nuclear receptor coactivator 2 | NCOA2 |
| MOL004974 | 3'-Methoxyglabridin | Nuclear receptor coactivator 1 | NCOA1 |
| MOL004978 | 2-[(3R)-8,8-dimethyl-3,4-dihydro-2H-pyrano[6,5-f]chromen-3-yl]-5-methoxyphenol | Prostaglandin G/H synthase 1 | PTGS1 |
| MOL004978 | 2-[(3R)-8,8-dimethyl-3,4-dihydro-2H-pyrano[6,5-f]chromen-3-yl]-5-methoxyphenol | Muscarinic acetylcholine receptor M3 | CHRM3 |
| MOL004978 | 2-[(3R)-8,8-dimethyl-3,4-dihydro-2H-pyrano[6,5-f]chromen-3-yl]-5-methoxyphenol | Muscarinic acetylcholine receptor M1 | CHRM1 |
| MOL004978 | 2-[(3R)-8,8-dimethyl-3,4-dihydro-2H-pyrano[6,5-f]chromen-3-yl]-5-methoxyphenol | Estrogen receptor | ESR1 |
| MOL004978 | 2-[(3R)-8,8-dimethyl-3,4-dihydro-2H-pyrano[6,5-f]chromen-3-yl]-5-methoxyphenol | Androgen receptor | AR |
| MOL004978 | 2-[(3R)-8,8-dimethyl-3,4-dihydro-2H-pyrano[6,5-f]chromen-3-yl]-5-methoxyphenol | Peroxisome proliferator-activated receptor gamma | PPARG |
| MOL004978 | 2-[(3R)-8,8-dimethyl-3,4-dihydro-2H-pyrano[6,5-f]chromen-3-yl]-5-methoxyphenol | Coagulation factor X | F10 |
| MOL004978 | 2-[(3R)-8,8-dimethyl-3,4-dihydro-2H-pyrano[6,5-f]chromen-3-yl]-5-methoxyphenol | Acetylcholinesterase | ACHE |
| MOL004978 | 2-[(3R)-8,8-dimethyl-3,4-dihydro-2H-pyrano[6,5-f]chromen-3-yl]-5-methoxyphenol | Estrogen receptor beta | ESR2 |
| MOL004978 | 2-[(3R)-8,8-dimethyl-3,4-dihydro-2H-pyrano[6,5-f]chromen-3-yl]-5-methoxyphenol | Glycogen synthase kinase-3 beta | GSK3B |
| MOL004978 | 2-[(3R)-8,8-dimethyl-3,4-dihydro-2H-pyrano[6,5-f]chromen-3-yl]-5-methoxyphenol | Serine/threonine-protein kinase Chk1 | CHEK1 |
| MOL004978 | 2-[(3R)-8,8-dimethyl-3,4-dihydro-2H-pyrano[6,5-f]chromen-3-yl]-5-methoxyphenol | cAMP-dependent protein kinase catalytic subunit alpha | PRKACA |
| MOL004978 | 2-[(3R)-8,8-dimethyl-3,4-dihydro-2H-pyrano[6,5-f]chromen-3-yl]-5-methoxyphenol | Trypsin-1 | PRSS1 |
| MOL004978 | 2-[(3R)-8,8-dimethyl-3,4-dihydro-2H-pyrano[6,5-f]chromen-3-yl]-5-methoxyphenol | Nuclear receptor coactivator 2 | NCOA2 |
| MOL004978 | 2-[(3R)-8,8-dimethyl-3,4-dihydro-2H-pyrano[6,5-f]chromen-3-yl]-5-methoxyphenol | Nuclear receptor coactivator 1 | NCOA1 |
| MOL004980 | Inflacoumarin A | Prothrombin | F2 |
| MOL004980 | Inflacoumarin A | Estrogen receptor | ESR1 |
| MOL004980 | Inflacoumarin A | Androgen receptor | AR |
| MOL004980 | Inflacoumarin A | Peroxisome proliferator-activated receptor gamma | PPARG |
| MOL004980 | Inflacoumarin A | Coagulation factor X | F10 |
| MOL004980 | Inflacoumarin A | Dipeptidyl peptidase 4 | DPP4 |
| MOL004980 | Inflacoumarin A | Heat shock protein HSP 90-alpha | HSP90AA1 |
| MOL004980 | Inflacoumarin A | Trypsin-1 | PRSS1 |
| MOL004980 | Inflacoumarin A | Nuclear receptor coactivator 2 | NCOA2 |
| MOL004980 | Inflacoumarin A | Prostaglandin G/H synthase 1 | PTGS1 |
| MOL004985 | icos-5-enoic acid | Nuclear receptor coactivator 2 | NCOA2 |
| MOL004988 | Kanzonol F | Estrogen receptor | ESR1 |
| MOL004988 | Kanzonol F | Androgen receptor | AR |
| MOL004988 | Kanzonol F | Coagulation factor X | F10 |
| MOL004988 | Kanzonol F | Estrogen receptor beta | ESR2 |
| MOL004988 | Kanzonol F | Nuclear receptor coactivator 2 | NCOA2 |
| MOL004989 | 6-prenylated eriodictyol | Estrogen receptor | ESR1 |
| MOL004989 | 6-prenylated eriodictyol | Coagulation factor X | F10 |
| MOL004989 | 6-prenylated eriodictyol | Coagulation factor VII | F7 |
| MOL004989 | 6-prenylated eriodictyol | Heat shock protein HSP 90-alpha | HSP90AA1 |
| MOL004990 | 7,2',4'-trihydroxy锛?-methoxy-3锛峚rylcoumarin | Prostaglandin G/H synthase 1 | PTGS1 |
| MOL004990 | 7,2',4'-trihydroxy锛?-methoxy-3锛峚rylcoumarin | Estrogen receptor | ESR1 |
| MOL004990 | 7,2',4'-trihydroxy锛?-methoxy-3锛峚rylcoumarin | Androgen receptor | AR |
| MOL004990 | 7,2',4'-trihydroxy锛?-methoxy-3锛峚rylcoumarin | Peroxisome proliferator-activated receptor gamma | PPARG |
| MOL004990 | 7,2',4'-trihydroxy锛?-methoxy-3锛峚rylcoumarin | Estrogen receptor beta | ESR2 |
| MOL004990 | 7,2',4'-trihydroxy锛?-methoxy-3锛峚rylcoumarin | Dipeptidyl peptidase 4 | DPP4 |
| MOL004990 | 7,2',4'-trihydroxy锛?-methoxy-3锛峚rylcoumarin | Glycogen synthase kinase-3 beta | GSK3B |
| MOL004990 | 7,2',4'-trihydroxy锛?-methoxy-3锛峚rylcoumarin | Heat shock protein HSP 90-alpha | HSP90AA1 |
| MOL004990 | 7,2',4'-trihydroxy锛?-methoxy-3锛峚rylcoumarin | Serine/threonine-protein kinase Chk1 | CHEK1 |
| MOL004990 | 7,2',4'-trihydroxy锛?-methoxy-3锛峚rylcoumarin | cAMP-dependent protein kinase catalytic subunit alpha | PRKACA |
| MOL004991 | 7-Acetoxy-2-methylisoflavone | Prostaglandin G/H synthase 1 | PTGS1 |
| MOL004991 | 7-Acetoxy-2-methylisoflavone | Prothrombin | F2 |
| MOL004991 | 7-Acetoxy-2-methylisoflavone | Estrogen receptor | ESR1 |
| MOL004991 | 7-Acetoxy-2-methylisoflavone | Androgen receptor | AR |
| MOL004991 | 7-Acetoxy-2-methylisoflavone | Peroxisome proliferator-activated receptor gamma | PPARG |
| MOL004991 | 7-Acetoxy-2-methylisoflavone | Acetylcholinesterase | ACHE |
| MOL004991 | 7-Acetoxy-2-methylisoflavone | Dipeptidyl peptidase 4 | DPP4 |
| MOL004991 | 7-Acetoxy-2-methylisoflavone | Glycogen synthase kinase-3 beta | GSK3B |
| MOL004991 | 7-Acetoxy-2-methylisoflavone | Heat shock protein HSP 90-alpha | HSP90AA1 |
| MOL004991 | 7-Acetoxy-2-methylisoflavone | Serine/threonine-protein kinase Chk1 | CHEK1 |
| MOL004991 | 7-Acetoxy-2-methylisoflavone | Trypsin-1 | PRSS1 |
| MOL004991 | 7-Acetoxy-2-methylisoflavone | Nuclear receptor coactivator 2 | NCOA2 |
| MOL004993 | 8-prenylated eriodictyol | Estrogen receptor | ESR1 |
| MOL004993 | 8-prenylated eriodictyol | Coagulation factor X | F10 |
| MOL004993 | 8-prenylated eriodictyol | Coagulation factor VII | F7 |
| MOL004993 | 8-prenylated eriodictyol | Heat shock protein HSP 90-alpha | HSP90AA1 |
| MOL004993 | 8-prenylated eriodictyol | Nuclear receptor coactivator 1 | NCOA1 |
| MOL004996 | gadelaidic acid | Nuclear receptor coactivator 2 | NCOA2 |
| MOL000500 | Vestitol | Prostaglandin G/H synthase 1 | PTGS1 |
| MOL000500 | Vestitol | Muscarinic acetylcholine receptor M1 | CHRM1 |
| MOL000500 | Vestitol | Estrogen receptor | ESR1 |
| MOL000500 | Vestitol | Androgen receptor | AR |
| MOL000500 | Vestitol | Peroxisome proliferator-activated receptor gamma | PPARG |
| MOL000500 | Vestitol | Muscarinic acetylcholine receptor M4 | CHRM4 |
| MOL000500 | Vestitol | Alpha-1A adrenergic receptor | ADRA1A |
| MOL000500 | Vestitol | Estrogen receptor beta | ESR2 |
| MOL000500 | Vestitol | Dipeptidyl peptidase 4 | DPP4 |
| MOL000500 | Vestitol | Glycogen synthase kinase-3 beta | GSK3B |
| MOL000500 | Vestitol | Heat shock protein HSP 90-alpha | HSP90AA1 |
| MOL000500 | Vestitol | Serine/threonine-protein kinase Chk1 | CHEK1 |
| MOL000500 | Vestitol | cAMP-dependent protein kinase catalytic subunit alpha | PRKACA |
| MOL000500 | Vestitol | Trypsin-1 | PRSS1 |
| MOL005000 | Gancaonin G | Prothrombin | F2 |
| MOL005000 | Gancaonin G | Estrogen receptor | ESR1 |
| MOL005000 | Gancaonin G | Androgen receptor | AR |
| MOL005000 | Gancaonin G | Peroxisome proliferator-activated receptor gamma | PPARG |
| MOL005000 | Gancaonin G | Coagulation factor X | F10 |
| MOL005000 | Gancaonin G | Estrogen receptor beta | ESR2 |
| MOL005000 | Gancaonin G | Dipeptidyl peptidase 4 | DPP4 |
| MOL005000 | Gancaonin G | Glycogen synthase kinase-3 beta | GSK3B |
| MOL005000 | Gancaonin G | Heat shock protein HSP 90-alpha | HSP90AA1 |
| MOL005000 | Gancaonin G | Serine/threonine-protein kinase Chk1 | CHEK1 |
| MOL005000 | Gancaonin G | Trypsin-1 | PRSS1 |
| MOL005000 | Gancaonin G | Nuclear receptor coactivator 2 | NCOA2 |
| MOL005001 | Gancaonin H | Estrogen receptor | ESR1 |
| MOL005001 | Gancaonin H | Androgen receptor | AR |
| MOL005001 | Gancaonin H | Coagulation factor X | F10 |
| MOL005001 | Gancaonin H | Heat shock protein HSP 90-alpha | HSP90AA1 |
| MOL005001 | Gancaonin H | Trypsin-1 | PRSS1 |
| MOL005001 | Gancaonin H | Nuclear receptor coactivator 2 | NCOA2 |
| MOL005003 | Licoagrocarpin | Prostaglandin G/H synthase 1 | PTGS1 |
| MOL005003 | Licoagrocarpin | Muscarinic acetylcholine receptor M3 | CHRM3 |
| MOL005003 | Licoagrocarpin | Prothrombin | F2 |
| MOL005003 | Licoagrocarpin | Muscarinic acetylcholine receptor M1 | CHRM1 |
| MOL005003 | Licoagrocarpin | Estrogen receptor | ESR1 |
| MOL005003 | Licoagrocarpin | Androgen receptor | AR |
| MOL005003 | Licoagrocarpin | Peroxisome proliferator-activated receptor gamma | PPARG |
| MOL005003 | Licoagrocarpin | Coagulation factor X | F10 |
| MOL005003 | Licoagrocarpin | Muscarinic acetylcholine receptor M5 | CHRM5 |
| MOL005003 | Licoagrocarpin | Acetylcholinesterase | ACHE |
| MOL005003 | Licoagrocarpin | Estrogen receptor beta | ESR2 |
| MOL005003 | Licoagrocarpin | Glycogen synthase kinase-3 beta | GSK3B |
| MOL005003 | Licoagrocarpin | Heat shock protein HSP 90-alpha | HSP90AA1 |
| MOL005003 | Licoagrocarpin | Trypsin-1 | PRSS1 |
| MOL005003 | Licoagrocarpin | Nuclear receptor coactivator 2 | NCOA2 |
| MOL005007 | Glyasperins M | Prostaglandin G/H synthase 1 | PTGS1 |
| MOL005007 | Glyasperins M | Estrogen receptor | ESR1 |
| MOL005007 | Glyasperins M | Androgen receptor | AR |
| MOL005007 | Glyasperins M | Peroxisome proliferator-activated receptor gamma | PPARG |
| MOL005007 | Glyasperins M | Coagulation factor X | F10 |
| MOL005007 | Glyasperins M | Coagulation factor VII | F7 |
| MOL005007 | Glyasperins M | Acetylcholinesterase | ACHE |
| MOL005007 | Glyasperins M | Estrogen receptor beta | ESR2 |
| MOL005007 | Glyasperins M | Glycogen synthase kinase-3 beta | GSK3B |
| MOL005007 | Glyasperins M | Heat shock protein HSP 90-alpha | HSP90AA1 |
| MOL005007 | Glyasperins M | cAMP-dependent protein kinase catalytic subunit alpha | PRKACA |
| MOL005007 | Glyasperins M | Trypsin-1 | PRSS1 |
| MOL005007 | Glyasperins M | Nuclear receptor coactivator 2 | NCOA2 |
| MOL005007 | Glyasperins M | Nuclear receptor coactivator 1 | NCOA1 |
| MOL005008 | Glycyrrhiza flavonol A | Estrogen receptor | ESR1 |
| MOL005008 | Glycyrrhiza flavonol A | Androgen receptor | AR |
| MOL005008 | Glycyrrhiza flavonol A | Coagulation factor X | F10 |
| MOL005008 | Glycyrrhiza flavonol A | Coagulation factor VII | F7 |
| MOL005008 | Glycyrrhiza flavonol A | Acetylcholinesterase | ACHE |
| MOL005008 | Glycyrrhiza flavonol A | Estrogen receptor beta | ESR2 |
| MOL005008 | Glycyrrhiza flavonol A | Dipeptidyl peptidase 4 | DPP4 |
| MOL005008 | Glycyrrhiza flavonol A | Glycogen synthase kinase-3 beta | GSK3B |
| MOL005008 | Glycyrrhiza flavonol A | Heat shock protein HSP 90-alpha | HSP90AA1 |
| MOL005008 | Glycyrrhiza flavonol A | Trypsin-1 | PRSS1 |
| MOL005012 | Licoagroisoflavone | Prothrombin | F2 |
| MOL005012 | Licoagroisoflavone | Estrogen receptor | ESR1 |
| MOL005012 | Licoagroisoflavone | Androgen receptor | AR |
| MOL005012 | Licoagroisoflavone | Peroxisome proliferator-activated receptor gamma | PPARG |
| MOL005012 | Licoagroisoflavone | Coagulation factor X | F10 |
| MOL005012 | Licoagroisoflavone | Estrogen receptor beta | ESR2 |
| MOL005012 | Licoagroisoflavone | Dipeptidyl peptidase 4 | DPP4 |
| MOL005012 | Licoagroisoflavone | Glycogen synthase kinase-3 beta | GSK3B |
| MOL005012 | Licoagroisoflavone | Serine/threonine-protein kinase Chk1 | CHEK1 |
| MOL005012 | Licoagroisoflavone | Trypsin-1 | PRSS1 |
| MOL005016 | Odoratin | Prostaglandin G/H synthase 1 | PTGS1 |
| MOL005016 | Odoratin | Estrogen receptor | ESR1 |
| MOL005016 | Odoratin | Androgen receptor | AR |
| MOL005016 | Odoratin | Peroxisome proliferator-activated receptor gamma | PPARG |
| MOL005016 | Odoratin | Estrogen receptor beta | ESR2 |
| MOL005016 | Odoratin | Dipeptidyl peptidase 4 | DPP4 |
| MOL005016 | Odoratin | Glycogen synthase kinase-3 beta | GSK3B |
| MOL005016 | Odoratin | Heat shock protein HSP 90-alpha | HSP90AA1 |
| MOL005016 | Odoratin | Serine/threonine-protein kinase Chk1 | CHEK1 |
| MOL005016 | Odoratin | Trypsin-1 | PRSS1 |
| MOL005016 | Odoratin | Nuclear receptor coactivator 2 | NCOA2 |
| MOL005017 | Phaseol | Prothrombin | F2 |
| MOL005017 | Phaseol | Estrogen receptor | ESR1 |
| MOL005017 | Phaseol | Androgen receptor | AR |
| MOL005017 | Phaseol | Peroxisome proliferator-activated receptor gamma | PPARG |
| MOL005017 | Phaseol | Glycogen synthase kinase-3 beta | GSK3B |
| MOL005017 | Phaseol | Heat shock protein HSP 90-alpha | HSP90AA1 |
| MOL005017 | Phaseol | Serine/threonine-protein kinase Chk1 | CHEK1 |
| MOL005017 | Phaseol | cAMP-dependent protein kinase catalytic subunit alpha | PRKACA |
| MOL005018 | Xambioona | Estrogen receptor | ESR1 |
| MOL005018 | Xambioona | Coagulation factor X | F10 |
| MOL005018 | Xambioona | Estrogen receptor beta | ESR2 |
| MOL005018 | Xambioona | Nuclear receptor coactivator 2 | NCOA2 |
| MOL005020 | dehydroglyasperins C | Estrogen receptor | ESR1 |
| MOL005020 | dehydroglyasperins C | Androgen receptor | AR |
| MOL005020 | dehydroglyasperins C | Peroxisome proliferator-activated receptor gamma | PPARG |
| MOL005020 | dehydroglyasperins C | Coagulation factor X | F10 |
| MOL005020 | dehydroglyasperins C | Estrogen receptor beta | ESR2 |
| MOL005020 | dehydroglyasperins C | Heat shock protein HSP 90-alpha | HSP90AA1 |
| MOL005020 | dehydroglyasperins C | Serine/threonine-protein kinase Chk1 | CHEK1 |
| MOL005020 | dehydroglyasperins C | Trypsin-1 | PRSS1 |
| MOL005020 | dehydroglyasperins C | Nuclear receptor coactivator 2 | NCOA2 |
| MOL000098 | quercetin | Prostaglandin G/H synthase 1 | PTGS1 |
| MOL000098 | quercetin | Androgen receptor | AR |
| MOL000098 | quercetin | Peroxisome proliferator-activated receptor gamma | PPARG |
| MOL000098 | quercetin | Heat shock protein HSP 90-alpha | HSP90AA1 |
| MOL000098 | quercetin | Nuclear receptor coactivator 2 | NCOA2 |
| MOL000098 | quercetin | Dipeptidyl peptidase 4 | DPP4 |
| MOL000098 | quercetin | Aldose reductase | AKR1B1 |
| MOL000098 | quercetin | Trypsin-1 | PRSS1 |
| MOL000098 | quercetin | Prothrombin | F2 |
| MOL000098 | quercetin | Coagulation factor X | F10 |
| MOL000098 | quercetin | cAMP-dependent protein kinase catalytic subunit alpha | PRKACA |
| MOL000098 | quercetin | Coagulation factor VII | F7 |
| MOL000098 | quercetin | Acetylcholinesterase | ACHE |
| MOL000098 | quercetin | Transcription factor p65 | RELA |
| MOL000098 | quercetin | Epidermal growth factor receptor | EGFR |
| MOL000098 | quercetin | G1/S-specific cyclin-D1 | CCND1 |
| MOL000098 | quercetin | Apoptosis regulator Bcl-2 | BCL2 |
| MOL000098 | quercetin | Proto-oncogene c-Fos | FOS |
| MOL000098 | quercetin | Eukaryotic translation initiation factor 6 | EIF6 |
| MOL000098 | quercetin | Caspase-9 | CASP9 |
| MOL000098 | quercetin | Urokinase-type plasminogen activator | PLAU |
| MOL000098 | quercetin | Retinoblastoma-associated protein | RB1 |
| MOL000098 | quercetin | Interleukin-6 | IL6 |
| MOL000098 | quercetin | Activator of 90 kDa heat shock protein ATPase homolog 1 | AHSA1 |
| MOL000098 | quercetin | Caspase-3 | CASP3 |
| MOL000098 | quercetin | Cellular tumor antigen p53 | TP63 |
| MOL000098 | quercetin | ETS domain-containing protein Elk-1 | ELK1 |
| MOL000098 | quercetin | NF-kappa-B inhibitor alpha | NFKBIA |
| MOL000098 | quercetin | Caspase-8 | CASP8 |
| MOL000098 | quercetin | RAF proto-oncogene serine/threonine-protein kinase | RAF1 |
| MOL000098 | quercetin | Protein kinase C alpha type | PRKCA |
| MOL000098 | quercetin | Hypoxia-inducible factor 1-alpha | HIF1A |
| MOL000098 | quercetin | Protein CBFA2T1 | RUNX1T1 |
| MOL000098 | quercetin | Receptor tyrosine-protein kinase erbB-2 | ERBB2 |
| MOL000098 | quercetin | Peroxisome proliferator-activated receptor gamma | PPARG |
| MOL000098 | quercetin | Acetyl-CoA carboxylase 1 | ACACA |
| MOL000098 | quercetin | Cytochrome P450 3A4 | CYP3A4 |
| MOL000098 | quercetin | Caveolin-1 | CAV1 |
| MOL000098 | quercetin | Myc proto-oncogene protein | MYC |
| MOL000098 | quercetin | Cytochrome P450 1A1 | CYP1A1 |
| MOL000098 | quercetin | Intercellular adhesion molecule 1 | ICAM1 |
| MOL000098 | quercetin | E-selectin | SELE |
| MOL000098 | quercetin | Vascular cell adhesion protein 1 | VCAM1 |
| MOL000098 | quercetin | Baculoviral IAP repeat-containing protein 5 | BIRC5 |
| MOL000098 | quercetin | Dual oxidase 2 | DUOX2 |
| MOL000098 | quercetin | Heat shock protein beta-1 | HSPB1 |
| MOL000098 | quercetin | Cytochrome P450 1B1 | CYP1B1 |
| MOL000098 | quercetin | G2/mitotic-specific cyclin-B1 | CCNB1 |
| MOL000098 | quercetin | Arachidonate 5-lipoxygenase | ALOX5 |
| MOL000098 | quercetin | Nuclear factor erythroid 2-related factor 2 | NFE2L2 |
| MOL000098 | quercetin | NAD(P)H dehydrogenase [quinone] 1 | NQO1 |
| MOL000098 | quercetin | Poly [ADP-ribose] polymerase 1 | PARP1 |
| MOL000098 | quercetin | Aryl hydrocarbon receptor | AHR |
| MOL000098 | quercetin | 26S proteasome non-ATPase regulatory subunit 3 | PSMD3 |
| MOL000098 | quercetin | Collagen alpha-1(III) chain | COL3A1 |
| MOL000098 | quercetin | DDB1- and CUL4-associated factor 5 | DCAF5 |
| MOL000098 | quercetin | Nuclear receptor subfamily 1 group I member 3 | NR1I3 |
| MOL000098 | quercetin | Serine/threonine-protein kinase Chk2 | CHEK2 |
| MOL000098 | quercetin | Heat shock factor protein 1 | HSF1 |
| MOL000098 | quercetin | C-reactive protein | CRP |
| MOL000098 | quercetin | Runt-related transcription factor 2 | RUNX2 |
| MOL000098 | quercetin | Ras association domain-containing protein 1 | RASSF1 |
| MOL000098 | quercetin | Cathepsin D | CTSD |
| MOL000098 | quercetin | Insulin-like growth factor-binding protein 3 | IGFBP3 |
| MOL000098 | quercetin | Insulin-like growth factor II | IGF2 |
| MOL000098 | quercetin | Interferon regulatory factor 1 | IRF1 |
| MOL000098 | quercetin | Receptor tyrosine-protein kinase erbB-3 | ERBB3 |
| MOL000098 | quercetin | Serum paraoxonase/arylesterase 1 | PON1 |
| MOL000098 | quercetin | Type I iodothyronine deiodinase | DIO1 |
| MOL000098 | quercetin | Puromycin-sensitive aminopeptidase | NPEPPS |
| MOL000098 | quercetin | Hexokinase-2 | HK2 |
| MOL000098 | quercetin | Ras GTPase-activating protein 1 | RASA1 |
| MOL000098 | quercetin | Glutathione S-transferase Mu 1 | GSTM1 |
| MOL000098 | quercetin | Glutathione S-transferase Mu 2 | GSTM2 |
| MOL003851 | Isoramanone | Progesterone receptor | PGR |
| MOL003851 | Isoramanone | Mineralocorticoid receptor | NR3C2 |
| MOL003851 | Isoramanone | Nuclear receptor coactivator 1 | NCOA1 |
| MOL000422 | kaempferol | Prostaglandin G/H synthase 1 | PTGS1 |
| MOL000422 | kaempferol | Androgen receptor | AR |
| MOL000422 | kaempferol | Peroxisome proliferator-activated receptor gamma | PPARG |
| MOL000422 | kaempferol | Heat shock protein HSP 90-alpha | HSP90AA1 |
| MOL000422 | kaempferol | cAMP-dependent protein kinase catalytic subunit alpha | PRKACA |
| MOL000422 | kaempferol | Nuclear receptor coactivator 2 | NCOA2 |
| MOL000422 | kaempferol | Dipeptidyl peptidase 4 | DPP4 |
| MOL000422 | kaempferol | Trypsin-1 | PRSS1 |
| MOL000422 | kaempferol | Progesterone receptor | PGR |
| MOL000422 | kaempferol | Prothrombin | F2 |
| MOL000422 | kaempferol | Muscarinic acetylcholine receptor M1 | CHRM1 |
| MOL000422 | kaempferol | Acetylcholinesterase | ACHE |
| MOL000422 | kaempferol | Muscarinic acetylcholine receptor M2 | CHRM2 |
| MOL000422 | kaempferol | Coagulation factor VII | F7 |
| MOL000422 | kaempferol | Transcription factor p65 | RELA |
| MOL000422 | kaempferol | Inhibitor of nuclear factor kappa-B kinase subunit beta | IKBKB |
| MOL000422 | kaempferol | Apoptosis regulator Bcl-2 | BCL2 |
| MOL000422 | kaempferol | Activator of 90 kDa heat shock protein ATPase homolog 1 | AHSA1 |
| MOL000422 | kaempferol | Caspase-3 | CASP3 |
| MOL000422 | kaempferol | Mitogen-activated protein kinase 8 | MAPK8 |
| MOL000422 | kaempferol | Peroxisome proliferator-activated receptor gamma | PPARG |
| MOL000422 | kaempferol | Cytochrome P450 3A4 | CYP3A4 |
| MOL000422 | kaempferol | Cytochrome P450 1A1 | CYP1A1 |
| MOL000422 | kaempferol | Intercellular adhesion molecule 1 | ICAM1 |
| MOL000422 | kaempferol | E-selectin | SELE |
| MOL000422 | kaempferol | Vascular cell adhesion protein 1 | VCAM1 |
| MOL000422 | kaempferol | Cytochrome P450 1B1 | CYP1B1 |
| MOL000422 | kaempferol | Arachidonate 5-lipoxygenase | ALOX5 |
| MOL000422 | kaempferol | Aryl hydrocarbon receptor | AHR |
| MOL000422 | kaempferol | 26S proteasome non-ATPase regulatory subunit 3 | PSMD3 |
| MOL000422 | kaempferol | Nuclear receptor subfamily 1 group I member 3 | NR1I3 |
| MOL000422 | kaempferol | Type I iodothyronine deiodinase | DIO1 |
| MOL000422 | kaempferol | Glutathione S-transferase Mu 1 | GSTM1 |
| MOL000422 | kaempferol | Glutathione S-transferase Mu 2 | GSTM2 |
| MOL000422 | kaempferol | Aldo-keto reductase family 1 member C3 | AKR1C3 |
| MOL004350 | Ruvoside_qt | Mineralocorticoid receptor | NR3C2 |
| MOL004350 | Ruvoside_qt | Nuclear receptor coactivator 1 | NCOA1 |
| MOL004355 | Spinasterol | Progesterone receptor | PGR |
| MOL004355 | Spinasterol | Mineralocorticoid receptor | NR3C2 |
| MOL004355 | Spinasterol | Nuclear receptor coactivator 2 | NCOA2 |
| MOL000098 | quercetin | Prostaglandin G/H synthase 1 | PTGS1 |
| MOL000098 | quercetin | Androgen receptor | AR |
| MOL000098 | quercetin | Peroxisome proliferator-activated receptor gamma | PPARG |
| MOL000098 | quercetin | Heat shock protein HSP 90-alpha | HSP90AA1 |
| MOL000098 | quercetin | Nuclear receptor coactivator 2 | NCOA2 |
| MOL000098 | quercetin | Dipeptidyl peptidase 4 | DPP4 |
| MOL000098 | quercetin | Aldose reductase | AKR1B1 |
| MOL000098 | quercetin | Trypsin-1 | PRSS1 |
| MOL000098 | quercetin | Prothrombin | F2 |
| MOL000098 | quercetin | Coagulation factor X | F10 |
| MOL000098 | quercetin | cAMP-dependent protein kinase catalytic subunit alpha | PRKACA |
| MOL000098 | quercetin | Coagulation factor VII | F7 |
| MOL000098 | quercetin | Acetylcholinesterase | ACHE |
| MOL000098 | quercetin | Transcription factor p65 | RELA |
| MOL000098 | quercetin | Epidermal growth factor receptor | EGFR |
| MOL000098 | quercetin | G1/S-specific cyclin-D1 | CCND1 |
| MOL000098 | quercetin | Apoptosis regulator Bcl-2 | BCL2 |
| MOL000098 | quercetin | Proto-oncogene c-Fos | FOS |
| MOL000098 | quercetin | Eukaryotic translation initiation factor 6 | EIF6 |
| MOL000098 | quercetin | Caspase-9 | CASP9 |
| MOL000098 | quercetin | Urokinase-type plasminogen activator | PLAU |
| MOL000098 | quercetin | Retinoblastoma-associated protein | RB1 |
| MOL000098 | quercetin | Interleukin-6 | IL6 |
| MOL000098 | quercetin | Activator of 90 kDa heat shock protein ATPase homolog 1 | AHSA1 |
| MOL000098 | quercetin | Caspase-3 | CASP3 |
| MOL000098 | quercetin | Cellular tumor antigen p53 | TP63 |
| MOL000098 | quercetin | ETS domain-containing protein Elk-1 | ELK1 |
| MOL000098 | quercetin | NF-kappa-B inhibitor alpha | NFKBIA |
| MOL000098 | quercetin | Caspase-8 | CASP8 |
| MOL000098 | quercetin | RAF proto-oncogene serine/threonine-protein kinase | RAF1 |
| MOL000098 | quercetin | Protein kinase C alpha type | PRKCA |
| MOL000098 | quercetin | Hypoxia-inducible factor 1-alpha | HIF1A |
| MOL000098 | quercetin | Protein CBFA2T1 | RUNX1T1 |
| MOL000098 | quercetin | Receptor tyrosine-protein kinase erbB-2 | ERBB2 |
| MOL000098 | quercetin | Peroxisome proliferator-activated receptor gamma | PPARG |
| MOL000098 | quercetin | Acetyl-CoA carboxylase 1 | ACACA |
| MOL000098 | quercetin | Cytochrome P450 3A4 | CYP3A4 |
| MOL000098 | quercetin | Caveolin-1 | CAV1 |
| MOL000098 | quercetin | Myc proto-oncogene protein | MYC |
| MOL000098 | quercetin | Cytochrome P450 1A1 | CYP1A1 |
| MOL000098 | quercetin | Intercellular adhesion molecule 1 | ICAM1 |
| MOL000098 | quercetin | E-selectin | SELE |
| MOL000098 | quercetin | Vascular cell adhesion protein 1 | VCAM1 |
| MOL000098 | quercetin | Baculoviral IAP repeat-containing protein 5 | BIRC5 |
| MOL000098 | quercetin | Dual oxidase 2 | DUOX2 |
| MOL000098 | quercetin | Heat shock protein beta-1 | HSPB1 |
| MOL000098 | quercetin | Cytochrome P450 1B1 | CYP1B1 |
| MOL000098 | quercetin | G2/mitotic-specific cyclin-B1 | CCNB1 |
| MOL000098 | quercetin | Arachidonate 5-lipoxygenase | ALOX5 |
| MOL000098 | quercetin | Nuclear factor erythroid 2-related factor 2 | NFE2L2 |
| MOL000098 | quercetin | NAD(P)H dehydrogenase [quinone] 1 | NQO1 |
| MOL000098 | quercetin | Poly [ADP-ribose] polymerase 1 | PARP1 |
| MOL000098 | quercetin | Aryl hydrocarbon receptor | AHR |
| MOL000098 | quercetin | 26S proteasome non-ATPase regulatory subunit 3 | PSMD3 |
| MOL000098 | quercetin | Collagen alpha-1(III) chain | COL3A1 |
| MOL000098 | quercetin | DDB1- and CUL4-associated factor 5 | DCAF5 |
| MOL000098 | quercetin | Nuclear receptor subfamily 1 group I member 3 | NR1I3 |
| MOL000098 | quercetin | Serine/threonine-protein kinase Chk2 | CHEK2 |
| MOL000098 | quercetin | Heat shock factor protein 1 | HSF1 |
| MOL000098 | quercetin | C-reactive protein | CRP |
| MOL000098 | quercetin | Runt-related transcription factor 2 | RUNX2 |
| MOL000098 | quercetin | Ras association domain-containing protein 1 | RASSF1 |
| MOL000098 | quercetin | Cathepsin D | CTSD |
| MOL000098 | quercetin | Insulin-like growth factor-binding protein 3 | IGFBP3 |
| MOL000098 | quercetin | Insulin-like growth factor II | IGF2 |
| MOL000098 | quercetin | Interferon regulatory factor 1 | IRF1 |
| MOL000098 | quercetin | Receptor tyrosine-protein kinase erbB-3 | ERBB3 |
| MOL000098 | quercetin | Serum paraoxonase/arylesterase 1 | PON1 |
| MOL000098 | quercetin | Type I iodothyronine deiodinase | DIO1 |
| MOL000098 | quercetin | Puromycin-sensitive aminopeptidase | NPEPPS |
| MOL000098 | quercetin | Hexokinase-2 | HK2 |
| MOL000098 | quercetin | Ras GTPase-activating protein 1 | RASA1 |
| MOL000098 | quercetin | Glutathione S-transferase Mu 1 | GSTM1 |
| MOL000098 | quercetin | Glutathione S-transferase Mu 2 | GSTM2 |

Table S3

| Gene Symbol | Gifts | GC Id | Relevance score |
| --- | --- | --- | --- |
| SFTPC | 42 | GC08P022156 | 66.5683136 |
| ABCA3 | 47 | GC16M002275 | 61.95101166 |
| MUC5B | 39 | GC11P001397 | 51.49752426 |
| COPA | 40 | GC01M160288 | 46.59482574 |
| SFTPA2 | 39 | GC10M080999 | 43.36281967 |
| TERT | 49 | GC05M001253 | 42.75312042 |
| SFTPA1 | 39 | GC10P089296 | 40.98009872 |
| PARN | 44 | GC16M014435 | 40.38360596 |
| SFTPB | 42 | GC02M085657 | 39.84175873 |
| MARS1 | 34 | GC12P057476 | 36.21864319 |
| MUC1 | 46 | GC01M155185 | 33.40385818 |
| RTEL1 | 39 | GC20P063658 | 33.12794495 |
| IL6 | 47 | GC07P022725 | 31.38036728 |
| CRP | 44 | GC01M159723 | 30.68806839 |
| DSP | 47 | GC06P007541 | 30.27742767 |
| SFTPD | 41 | GC10M079937 | 30.26171875 |
| FARSB | 41 | GC02M222570 | 30.22849274 |
| TNF | 48 | GC06P070143 | 29.93318939 |
| FAM13A | 37 | GC04M088725 | 29.08000755 |
| ITGA3 | 44 | GC17P050055 | 28.90861702 |
| DPP9 | 40 | GC19M004675 | 28.56615067 |
| ATP11A | 39 | GC13P112690 | 28.56615067 |
| STN1 | 30 | GC10M103909 | 28.56615067 |
| CXCL8 | 39 | GC04P073740 | 28.37147141 |
| IL10 | 44 | GC01M206767 | 27.08105659 |
| TGFB1 | 49 | GC19M041301 | 26.86526299 |
| IFNG | 45 | GC12M068154 | 26.39174843 |
| MMP1 | 48 | GC11M102810 | 25.09204102 |
| ELANE | 44 | GC19P001053 | 24.06800079 |
| HLA-DRB1 | 45 | GC06M032578 | 23.44055367 |
| CCL2 | 46 | GC17P034255 | 22.98635101 |
| MTMR10 | 32 | GC15M030919 | 22.95536232 |
| IL13 | 42 | GC05P132656 | 22.12259293 |
| IL17A | 39 | GC06P052186 | 22.10113525 |
| IL4 | 43 | GC05P132673 | 22.00361252 |
| ALB | 47 | GC04P073397 | 21.360466 |
| IL1B | 46 | GC02M112829 | 20.83101082 |
| STAT3 | 50 | GC17M042313 | 19.89187622 |
| CCL5 | 41 | GC17M035871 | 19.35153961 |
| ACE | 47 | GC17P063477 | 18.96368408 |
| TLR4 | 48 | GC09P117704 | 18.95307541 |
| TLR5 | 45 | GC01M223462 | 18.93313408 |
| CD40LG | 44 | GC0XP136649 | 18.27137184 |
| LACTB | 34 | GC15P087865 | 18.19963646 |
| MMP9 | 51 | GC20P046008 | 18.15423584 |
| ICAM1 | 47 | GC19P010272 | 17.83882523 |
| INPP5E | 39 | GC09M136428 | 17.63734055 |
| FARSA | 39 | GC19M012922 | 17.46195602 |
| CCN2 | 36 | GC06M131948 | 17.43476295 |
| NKX2-1 | 44 | GC14M036516 | 17.38944244 |
| IL5 | 42 | GC05M132541 | 17.28489494 |
| CXCL10 | 42 | GC04M076021 | 17.11238098 |
| SERPINA1 | 46 | GC14M094376 | 16.9022522 |
| SERPINE1 | 47 | GC07P101127 | 16.70036316 |
| CSF3 | 37 | GC17P040015 | 16.44881439 |
| CCL3 | 37 | GC17M036088 | 16.4103508 |
| CD8A | 44 | GC02M086784 | 16.35292625 |
| CCR6 | 43 | GC06P167111 | 16.34109116 |
| TIMP1 | 42 | GC0XP047583 | 16.30547905 |
| CXCR4 | 50 | GC02M136114 | 16.12598801 |
| TLR2 | 48 | GC04P153684 | 16.08487892 |
| CD4 | 47 | GC12P006786 | 16.02720451 |
| CHAT | 45 | GC10P049609 | 16.02165985 |
| IL18 | 41 | GC11M112143 | 15.94761181 |
| FOXP3 | 44 | GC0XM049250 | 15.86808968 |
| CCL18 | 35 | GC17P036064 | 15.61398315 |
| MPO | 48 | GC17M058269 | 15.59820175 |
| CXCR3 | 42 | GC0XM071615 | 15.59522629 |
| ADA | 48 | GC20M044620 | 15.48214245 |
| CAV1 | 46 | GC07P116524 | 15.33325481 |
| SHH | 47 | GC07M155799 | 15.20515442 |
| CSF2 | 41 | GC05P132073 | 15.16100121 |
| ELN | 43 | GC07P074027 | 14.92226028 |
| HMGB1 | 43 | GC13M030456 | 14.80157566 |
| ITGAM | 44 | GC16P037846 | 14.64813328 |
| HMOX1 | 50 | GC22P035380 | 14.40227318 |
| CXCL5 | 38 | GC04M073995 | 14.3978548 |
| VEGFA | 46 | GC06P043770 | 14.30798531 |
| MBL2 | 44 | GC10M052760 | 14.28837776 |
| IL1RN | 46 | GC02P119261 | 14.28347588 |
| CCL17 | 35 | GC16P057409 | 14.20298195 |
| PRTN3 | 43 | GC19P000840 | 14.18283558 |
| DOCK8 | 41 | GC09P000214 | 14.12869072 |
| IFIH1 | 44 | GC02M162267 | 14.03819275 |
| UMOD | 39 | GC16M020344 | 13.99804974 |
| TP53 | 50 | GC17M007661 | 13.81661701 |
| PTPRC | 48 | GC01P198607 | 13.65233994 |
| FGF2 | 44 | GC04P122826 | 13.62369156 |
| SMPD1 | 45 | GC11P006390 | 13.41637897 |
| PIK3C2A | 45 | GC11M017424 | 13.34506512 |
| EGFR | 51 | GC07P055019 | 13.32769394 |
| CFTR | 48 | GC07P117287 | 13.26887512 |
| CD19 | 47 | GC16P037640 | 13.23979664 |
| EDN1 | 45 | GC06P012256 | 13.2350769 |
| CCR4 | 43 | GC03P032951 | 13.21167755 |
| B2M | 46 | GC15P044711 | 13.20647144 |
| SCGB1A1 | 38 | GC11P062405 | 13.19979668 |
| IL1A | 41 | GC02M112773 | 13.16421795 |
| WDR19 | 36 | GC04P039184 | 13.15547085 |
| CXCL9 | 37 | GC04M076001 | 12.99142075 |
| IL2 | 42 | GC04M122451 | 12.93170357 |
| BTK | 51 | GC0XM101349 | 12.92990685 |
| CXCL1 | 40 | GC04P073869 | 12.90853882 |
| STAT5B | 47 | GC17M042199 | 12.6300354 |
| NSMCE3 | 30 | GC15M029269 | 12.48789787 |
| KIT | 50 | GC04P054657 | 12.48657227 |
| STING1 | 32 | GC05M139476 | 12.38512039 |
| CCL22 | 35 | GC16P057359 | 12.34224319 |
| SERPINH1 | 43 | GC11P075562 | 12.31144905 |
| TRIM21 | 40 | GC11M004384 | 11.99766731 |
| TNC | 47 | GC09M115019 | 11.92451668 |
| IL33 | 36 | GC09P006226 | 11.91776276 |
| CD34 | 40 | GC01M207880 | 11.86401749 |
| HPS1 | 40 | GC10M098416 | 11.81431866 |
| PPARG | 50 | GC03P012287 | 11.36678696 |
| IL2RA | 47 | GC10M006010 | 11.34270668 |
| CCR7 | 43 | GC17M040556 | 11.28789139 |
| TNFRSF13B | 44 | GC17M016929 | 11.26936436 |
| RAG1 | 43 | GC11P036529 | 11.24731159 |
| MMP12 | 43 | GC11M102862 | 11.20972252 |
| CXCL12 | 43 | GC10M044294 | 11.14805031 |
| CD79A | 44 | GC19P041877 | 11.11971283 |
| CSF2RB | 46 | GC22P036913 | 11.05761051 |
| REN | 45 | GC01M204154 | 11.03248596 |
| FN1 | 48 | GC02M215360 | 10.92816639 |
| GBA | 45 | GC01M155234 | 10.91255379 |
| MYD88 | 47 | GC03P038139 | 10.87108612 |
| EGF | 48 | GC04P109912 | 10.86746407 |
| CYBB | 44 | GC0XP037780 | 10.86325264 |
| ITGB2 | 48 | GC21M044885 | 10.80725479 |
| SELL | 40 | GC01M169690 | 10.75436687 |
| NFKB1 | 50 | GC04P102501 | 10.70823765 |
| CD36 | 46 | GC07P080369 | 10.5975132 |
| CCL11 | 40 | GC17P034285 | 10.57450962 |
| CXCR2 | 47 | GC02P218125 | 10.54647446 |
| DHPS | 41 | GC19M013350 | 10.45758629 |
| MMP2 | 50 | GC16P055390 | 10.44806671 |
| FGF8 | 44 | GC10M101770 | 10.27710152 |
| CDH1 | 47 | GC16P068737 | 10.26251984 |
| GREM1 | 41 | GC15P035541 | 10.24872875 |
| MMP8 | 46 | GC11M102617 | 10.16147041 |
| MUC5AC | 36 | GC11P001396 | 10.08776283 |
| ELMOD2 | 35 | GC04P140524 | 10.0672884 |
| VCAM1 | 43 | GC01P100719 | 10.01197624 |
| IGF1 | 47 | GC12M102395 | 10.00447464 |
| TLR9 | 43 | GC03M052222 | 9.946051598 |
| SPP1 | 43 | GC04P087975 | 9.944215775 |
| AGT | 47 | GC01M230702 | 9.892753601 |
| SPPL2C | 30 | GC17P045844 | 9.888633728 |
| NPHP1 | 42 | GC02M110122 | 9.842303276 |
| JUN | 46 | GC01M058780 | 9.811075211 |
| IL1R1 | 43 | GC02P102136 | 9.765600204 |
| TGFB3 | 44 | GC14M075958 | 9.62444973 |
| INVS | 42 | GC09P100099 | 9.56570816 |
| NPC2 | 39 | GC14M074476 | 9.543064117 |
| MMP3 | 48 | GC11M102835 | 9.516073227 |
| CALCA | 41 | GC11M014945 | 9.486270905 |
| THBD | 42 | GC20M023026 | 9.458138466 |
| HLA-DQB1 | 40 | GC06M056568 | 9.391112328 |
| TINF2 | 40 | GC14M024248 | 9.335234642 |
| COL3A1 | 44 | GC02P188974 | 9.308878899 |
| HLA-DPB1 | 42 | GC06P070178 | 9.285484314 |
| GPT | 39 | GC08P144502 | 9.242447853 |
| CTLA4 | 43 | GC02P203867 | 9.192950249 |
| MMP7 | 46 | GC11M102425 | 9.175765991 |
| CHI3L1 | 42 | GC01M203148 | 9.168710709 |
| NEU1 | 42 | GC06M031857 | 9.130116463 |
| LIG4 | 46 | GC13M108207 | 9.086796761 |
| ACTC1 | 40 | GC15M034790 | 9.053684235 |
| FBN1 | 44 | GC15M048408 | 9.047874451 |
| TREM1 | 39 | GC06M041267 | 9.023701668 |
| HIF1A | 45 | GC14P061695 | 9.020158768 |
| HLA-B | 45 | GC06M056463 | 8.96780014 |
| FASLG | 44 | GC01P172628 | 8.903471947 |
| IL2RG | 45 | GC0XM071108 | 8.878837585 |
| CCL4 | 38 | GC17P036103 | 8.878160477 |
| APBB1 | 42 | GC11M006396 | 8.870215416 |
| RNASE3 | 39 | GC14P020891 | 8.834956169 |
| CR1 | 43 | GC01P207496 | 8.804397583 |
| IRF5 | 45 | GC07P128937 | 8.759747505 |
| CXCL2 | 38 | GC04M074097 | 8.743859291 |
| PDGFB | 47 | GC22M053523 | 8.743616104 |
| FAM189A1 | 30 | GC15M029120 | 8.724758148 |
| BMP4 | 47 | GC14M053949 | 8.699317932 |
| FCGR2A | 43 | GC01P161505 | 8.592877388 |
| RNF168 | 41 | GC03M196468 | 8.592033386 |
| DNAH11 | 40 | GC07P021543 | 8.583843231 |
| CYBC1 | 25 | GC17M082443 | 8.559979439 |
| AGTR1 | 48 | GC03P148697 | 8.541590691 |
| IRAK4 | 46 | GC12P043758 | 8.529230118 |
| TLR3 | 49 | GC04P186059 | 8.49674511 |
| CD1E | 38 | GC01P158354 | 8.467986107 |
| ACE2 | 46 | GC0XM015494 | 8.452939987 |
| MAPK3 | 47 | GC16M034315 | 8.424297333 |
| ATP4A | 39 | GC19M057950 | 8.415904999 |
| AKT1 | 51 | GC14M104769 | 8.40972805 |
| NCF1 | 46 | GC07P074773 | 8.405992508 |
| SLPI | 38 | GC20M045252 | 8.378445625 |
| ATP12A | 41 | GC13P024680 | 8.375778198 |
| TOLLIP | 41 | GC11M001274 | 8.353145599 |
| ASAH1 | 44 | GC08M018055 | 8.329314232 |
| HGF | 49 | GC07M081699 | 8.286757469 |
| ADM | 42 | GC11P010304 | 8.218008041 |
| IL7R | 44 | GC05P035852 | 8.202466965 |
| TNFRSF13C | 41 | GC22M053065 | 8.189451218 |
| PTCH1 | 48 | GC09M095442 | 8.186943054 |
| CCR2 | 43 | GC03P046356 | 8.180094719 |
| INS | 45 | GC11M002159 | 8.167109489 |
| FOXF1 | 41 | GC16P086510 | 8.138051033 |
| LBP | 41 | GC20P038346 | 8.103517532 |
| TGFB2 | 48 | GC01P218345 | 8.0974617 |
| CYBA | 45 | GC16M088643 | 8.087763786 |
| COL4A5 | 42 | GC0XP108439 | 8.086612701 |
| ALOX5 | 47 | GC10P045374 | 8.04992485 |
| LRBA | 39 | GC04M150264 | 8.031990051 |
| ICOS | 40 | GC02P203937 | 8.030623436 |
| MRC1 | 38 | GC10P017809 | 8.017972946 |
| S100A1 | 39 | GC01P153627 | 8.013971329 |
| CDH2 | 50 | GC18M027950 | 8.007867813 |
| BMP6 | 41 | GC06P007726 | 7.988623619 |
| AGER | 42 | GC06M032180 | 7.988199711 |
| SLC35C1 | 39 | GC11P046283 | 7.949605942 |
| DKC1 | 45 | GC0XP154762 | 7.935156822 |
| IL13RA2 | 38 | GC0XM115003 | 7.92826128 |
| PKD1 | 44 | GC16M005475 | 7.916636944 |
| NCF2 | 45 | GC01M183555 | 7.8264184 |
| CTNNB1 | 51 | GC03P041236 | 7.814905167 |
| ATM | 50 | GC11P108222 | 7.809168339 |
| TNNI3 | 46 | GC19M055151 | 7.806023598 |
| H2AC18 | 25 | GC01M150436 | 7.773886681 |
| THBS1 | 42 | GC15P039581 | 7.690753937 |
| NPC1 | 45 | GC18M023506 | 7.677862167 |
| TAC1 | 40 | GC07P097731 | 7.64905405 |
| HNF1B | 42 | GC17M037686 | 7.632182121 |
| SSB | 40 | GC02P169791 | 7.631487846 |
| KMT2D | 39 | GC12M049018 | 7.612559319 |
| TTC21B | 36 | GC02M165905 | 7.597668648 |
| CASP3 | 47 | GC04M184627 | 7.566497803 |
| SERPINA3 | 41 | GC14P094612 | 7.502400875 |
| SREBF1 | 44 | GC17M017810 | 7.488546848 |
| DNAAF2 | 35 | GC14M049625 | 7.478516579 |
| PKHD1 | 36 | GC06M056871 | 7.475129604 |
| CCR5 | 44 | GC03P046383 | 7.452942848 |
| NGF | 47 | GC01M115285 | 7.446508408 |
| HLA-A | 45 | GC06P070103 | 7.441931248 |
| POSTN | 41 | GC13M037562 | 7.427904606 |
| TRPV1 | 44 | GC17M003565 | 7.409488678 |
| SLC34A2 | 44 | GC04P025657 | 7.403374672 |
| COL1A1 | 48 | GC17M050183 | 7.394448757 |
| GSN | 46 | GC09P121201 | 7.389368057 |
| LGALS3 | 42 | GC14P055124 | 7.379314423 |
| VTN | 41 | GC17M032763 | 7.374671936 |
| LAMC2 | 44 | GC01P183186 | 7.347483635 |
| CFI | 44 | GC04M109732 | 7.314047337 |
| CSF2RA | 43 | GC0XP001474 | 7.298173904 |
| CLEC7A | 42 | GC12M018215 | 7.286991596 |
| IGFBP3 | 42 | GC07M045912 | 7.278460979 |
| CXCR1 | 41 | GC02M218162 | 7.259607792 |
| APOE | 47 | GC19P045397 | 7.255403519 |
| FGF7 | 39 | GC15P049423 | 7.252160072 |
| ODAD1 | 25 | GC19M057357 | 7.210771561 |
| VIM | 47 | GC10P017227 | 7.182785988 |
| MIF | 47 | GC22P023894 | 7.159397125 |
| UNC119 | 40 | GC17M028546 | 7.151225567 |
| CFH | 43 | GC01P196621 | 7.149632454 |
| GAPDH | 46 | GC12P016412 | 7.131098747 |
| DNAI2 | 38 | GC17P074274 | 7.08946085 |
| ANKS6 | 36 | GC09M098731 | 7.072321892 |
| ERF | 40 | GC19M042247 | 7.064209461 |
| SP110 | 39 | GC02M230167 | 7.056678772 |
| BPI | 39 | GC20P038304 | 7.04288578 |
| PDGFA | 41 | GC07M000497 | 7.033385754 |
| PRL | 40 | GC06M022287 | 7.031311512 |
| SERPINB1 | 38 | GC06M002833 | 6.977221489 |
| TMEM67 | 36 | GC08P093754 | 6.969286919 |
| ADRB2 | 47 | GC05P148825 | 6.959754467 |
| CD44 | 44 | GC11P035139 | 6.953233719 |
| C3 | 45 | GC19M006677 | 6.94335556 |
| MSX1 | 43 | GC04P004861 | 6.939692497 |
| SMAD4 | 48 | GC18P051028 | 6.9322052 |
| BDNF | 44 | GC11M027654 | 6.901602745 |
| PDGFRA | 51 | GC04P054229 | 6.875877857 |
| IL9 | 40 | GC05M135891 | 6.856572151 |
| SLC11A1 | 45 | GC02P218382 | 6.845424175 |
| TP63 | 46 | GC03P189598 | 6.826313019 |
| APOA1 | 46 | GC11M116835 | 6.788957596 |
| SPARC | 48 | GC05M151661 | 6.785318375 |
| RAC2 | 48 | GC22M037227 | 6.767206192 |
| IGHMBP2 | 40 | GC11P068903 | 6.764260292 |
| CCDC40 | 35 | GC17P080037 | 6.746907234 |
| CCDC39 | 34 | GC03M180602 | 6.746907234 |
| DRC1 | 31 | GC02P026401 | 6.746907234 |
| ODAD2 | 25 | GC10M027776 | 6.746907234 |
| KNG1 | 43 | GC03P186717 | 6.74123764 |
| IRF6 | 42 | GC01M209785 | 6.701255798 |
| CD14 | 43 | GC05M140631 | 6.681328773 |
| CCND1 | 50 | GC11P069641 | 6.656789303 |
| OFD1 | 40 | GC0XP013734 | 6.650140762 |
| ZAP70 | 49 | GC02P097715 | 6.650050163 |
| HLA-DQA1 | 40 | GC06P070172 | 6.646668911 |
| PAFAH1B1 | 43 | GC17P002593 | 6.643159866 |
| CD27 | 42 | GC12P016368 | 6.642585278 |
| TGIF1 | 44 | GC18P003411 | 6.630657196 |
| KRT18 | 46 | GC12P052948 | 6.621361256 |
| PLA2G6 | 46 | GC22M054005 | 6.617323399 |
| FAS | 47 | GC10P089158 | 6.609246254 |
| IFNB1 | 39 | GC09M021077 | 6.569038868 |
| MALT1 | 45 | GC18P058671 | 6.565900326 |
| PLAT | 46 | GC08M042174 | 6.555262566 |
| F3 | 42 | GC01M094546 | 6.539043903 |
| F2 | 46 | GC11P046720 | 6.530709267 |
| NHP2 | 42 | GC05M178149 | 6.514417171 |
| LYZ | 45 | GC12P069348 | 6.50769186 |
| CYP1A1 | 45 | GC15M074719 | 6.498646736 |
| KRAS | 48 | GC12M025204 | 6.469069481 |
| PIK3CD | 51 | GC01P009629 | 6.468071938 |
| PLCG2 | 49 | GC16P081773 | 6.453727722 |
| ITGA4 | 46 | GC02P181456 | 6.449687004 |
| STAT6 | 47 | GC12M057095 | 6.447658539 |
| CD1B | 38 | GC01M158297 | 6.416378498 |
| IL3 | 41 | GC05P132060 | 6.412371635 |
| MCIDAS | 28 | GC05M055219 | 6.394034386 |
| CD1A | 40 | GC01P158255 | 6.386555195 |
| NOS1 | 47 | GC12M117208 | 6.385195732 |
| DHFR | 46 | GC05M080626 | 6.379455566 |
| CD69 | 38 | GC12M018210 | 6.369056225 |
| S100A12 | 37 | GC01M153373 | 6.359807014 |
| IRF8 | 44 | GC16P085898 | 6.348614693 |
| LTF | 42 | GC03M046435 | 6.346639156 |
| NOS3 | 49 | GC07P150990 | 6.316286087 |
| ITGAL | 44 | GC16P030472 | 6.308292389 |
| HRH2 | 42 | GC05P175659 | 6.297839165 |
| DEFB4A | 34 | GC08P007895 | 6.280980587 |
| RAC1 | 47 | GC07P006377 | 6.275783539 |
| EPG5 | 35 | GC18M045800 | 6.263953209 |
| ACTA2 | 46 | GC10M088935 | 6.257531166 |
| CD1D | 40 | GC01P158178 | 6.243710518 |
| NOP10 | 38 | GC15M034341 | 6.237265587 |
| AGTR2 | 41 | GC0XP116170 | 6.235887527 |
| SOD3 | 39 | GC04P024798 | 6.222105026 |
| CD1C | 38 | GC01P158289 | 6.213931084 |
| NECTIN1 | 35 | GC11M119624 | 6.176473618 |
| ACP5 | 44 | GC19M011574 | 6.170305252 |
| STK36 | 42 | GC02P218672 | 6.142387867 |
| GAS8 | 37 | GC16P090019 | 6.142387867 |
| HP | 42 | GC16P072089 | 6.12599802 |
| NPHP3 | 37 | GC03M132683 | 6.123262882 |
| SELE | 41 | GC01M169722 | 6.120827675 |
| HSPD1 | 45 | GC02M197486 | 6.106155396 |
| LTA | 39 | GC06P070141 | 6.101852417 |
| PTEN | 50 | GC10P087863 | 6.101282597 |
| CREBBP | 50 | GC16M005641 | 6.087797165 |
| ICOSLG | 36 | GC21M044222 | 6.080445766 |
| ARG1 | 47 | GC06P131473 | 6.073081017 |
| GRP | 39 | GC18P059220 | 6.071643829 |
| TERF1 | 40 | GC08P073003 | 6.067610741 |
| SMAD2 | 46 | GC18M047809 | 6.057604313 |
| IL21R | 39 | GC16P027454 | 6.026293278 |
| FOXE1 | 41 | GC09P097853 | 6.011004448 |
| TBX22 | 38 | GC0XP080014 | 6.01035881 |
| VAX1 | 36 | GC10M117128 | 6.01035881 |
| NOD2 | 46 | GC16P050693 | 6.001805305 |

Table S4

| ABCA3 | 7.37E-06 | 7.37E-06 |
| --- | --- | --- |
| ABCC2 | 8.64E-05 | 8.64E-05 |
| ACACA | 0.00234536 | 0.00234536 |
| ACE | 0.001010955 | 0.001010955 |
| ACE2 | 0.000122957 | 0.000122957 |
| ACHE | 6.97E-05 | 6.97E-05 |
| ACP5 | 6.75E-05 | 6.75E-05 |
| ACTA2 | 0.001128283 | 0.001128283 |
| ACTC1 | 0.000149006 | 0.000149006 |
| ADA | 3.78E-05 | 3.78E-05 |
| ADM | 7.52E-05 | 7.52E-05 |
| ADRA1A | 2.90E-05 | 2.90E-05 |
| ADRB2 | 0.000614192 | 0.000614192 |
| AGER | 0.000129867 | 0.000129867 |
| AGT | 0.000598465 | 0.000598465 |
| AGTR1 | 0.001501665 | 0.001501665 |
| AGTR2 | 0.000580283 | 0.000580283 |
| AHR | 0.00144155 | 0.00144155 |
| AHSA1 | 7.31E-05 | 7.31E-05 |
| AKR1B1 | 0.000161263 | 0.000161263 |
| AKR1C1 | 0.001907916 | 0.001907916 |
| AKR1C3 | 0.001507287 | 0.001507287 |
| AKT1 | 0.001650133 | 0.001650133 |
| ALB | 0.001580522 | 0.001580522 |
| ALOX5 | 0.036758101 | 0.036758101 |
| ANKS6 | 3.18E-05 | 3.18E-05 |
| APBB1 | 8.01E-05 | 8.01E-05 |
| APOA1 | 0.000965828 | 0.000965828 |
| APOB | 0.001491234 | 0.001491234 |
| APOD | 0.000105608 | 0.000105608 |
| APOE | 0.001184974 | 0.001184974 |
| APP | 0.000862895 | 0.000862895 |
| AR | 0.001365384 | 0.001365384 |
| ARG1 | 0.000332906 | 0.000332906 |
| ASAH1 | 1.04E-05 | 1.04E-05 |
| ATM | 0.000625277 | 0.000625277 |
| ATP12A | 7.79E-05 | 7.79E-05 |
| ATP4A | 7.19E-05 | 7.19E-05 |
| B2M | 0.000109147 | 0.000109147 |
| B7RP1 | 4.49E-05 | 4.49E-05 |
| BACE1 | 6.18E-05 | 6.18E-05 |
| BCL2 | 0.000501902 | 0.000501902 |
| BDNF | 0.000725968 | 0.000725968 |
| BIRC5 | 0.001362152 | 0.001362152 |
| BMP4 | 0.000135438 | 0.000135438 |
| BMP6 | 2.72E-05 | 2.72E-05 |
| BPI | 8.58E-05 | 8.58E-05 |
| BTK | 0.000463825 | 0.000463825 |
| C3 | 0.000683857 | 0.000683857 |
| CA2 | 8.87E-05 | 8.87E-05 |
| CALCA | 6.29E-05 | 6.29E-05 |
| CASP3 | 0.037637003 | 0.037637003 |
| CASP7 | 0.000593092 | 0.000593092 |
| CASP8 | 0.001506514 | 0.001506514 |
| CASP9 | 0.000891466 | 0.000891466 |
| CAV1 | 0.037570285 | 0.037570285 |
| CCDC39 | 0 | 0 |
| CCDC40 | 0 | 0 |
| CCL11 | 0.000552935 | 0.000552935 |
| CCL17 | 8.41E-05 | 8.41E-05 |
| CCL18 | 4.26E-05 | 4.26E-05 |
| CCL2 | 0.001535489 | 0.001535489 |
| CCL22 | 0.000332087 | 0.000332087 |
| CCL3 | 0.000492603 | 0.000492603 |
| CCL4 | 0.000574977 | 0.000574977 |
| CCL5 | 0.000670185 | 0.000670185 |
| CCNB1 | 0.000847037 | 0.000847037 |
| CCND1 | 0.037270368 | 0.037270368 |
| CCR2 | 0.00027742 | 0.00027742 |
| CCR4 | 5.99E-05 | 5.99E-05 |
| CCR5 | 0.000444839 | 0.000444839 |
| CCR7 | 0.000140204 | 0.000140204 |
| CD14 | 0.000109702 | 0.000109702 |
| CD163 | 0.000353879 | 0.000353879 |
| CD19 | 0.00027386 | 0.00027386 |
| CD1A | 5.13E-05 | 5.13E-05 |
| CD1B | 5.06E-05 | 5.06E-05 |
| CD1C | 0.000103918 | 0.000103918 |
| CD1D | 0.000308564 | 0.000308564 |
| CD1E | 5.25E-05 | 5.25E-05 |
| CD27 | 9.54E-05 | 9.54E-05 |
| CD34 | 0.000928388 | 0.000928388 |
| CD36 | 0.000721438 | 0.000721438 |
| CD4 | 0.001000789 | 0.001000789 |
| CD40LG | 0.000491179 | 0.000491179 |
| CD44 | 0.001550491 | 0.001550491 |
| CD69 | 0.000135731 | 0.000135731 |
| CD79A | 0.000108766 | 0.000108766 |
| CD8A | 0.000726636 | 0.000726636 |
| CDH1 | 0.001416175 | 0.001416175 |
| CDH2 | 0.000696227 | 0.000696227 |
| CFH | 0.000709358 | 0.000709358 |
| CFI | 7.73E-05 | 7.73E-05 |
| CFTR | 0.000559111 | 0.000559111 |
| CHAT | 2.67E-05 | 2.67E-05 |
| CHEK1 | 0.000181211 | 0.000181211 |
| CHEK2 | 0.000140251 | 0.000140251 |
| CHI3L1 | 7.79E-05 | 7.79E-05 |
| CHRM1 | 0.000510219 | 0.000510219 |
| CHRM2 | 3.81E-05 | 3.81E-05 |
| CHRM3 | 3.19E-05 | 3.19E-05 |
| CHRM4 | 1.80E-05 | 1.80E-05 |
| CHRM5 | 3.17E-05 | 3.17E-05 |
| CHRNA2 | 4.17E-06 | 4.17E-06 |
| CHRNA7 | 2.01E-05 | 2.01E-05 |
| CLEC7A | 9.19E-05 | 9.19E-05 |
| COL1A1 | 0.001364301 | 0.001364301 |
| COL3A1 | 0.036621626 | 0.036621626 |
| COL4A5 | 0.000132207 | 0.000132207 |
| COPA | 7.11E-05 | 7.11E-05 |
| CR1 | 4.51E-05 | 4.51E-05 |
| CREBBP | 0.001829059 | 0.001829059 |
| CRP | 0.037840969 | 0.037840969 |
| CSF2 | 0.000610389 | 0.000610389 |
| CSF2RA | 8.41E-05 | 8.41E-05 |
| CSF2RB | 0.000279387 | 0.000279387 |
| CSF3 | 0.000485445 | 0.000485445 |
| CTGF | 0.001325976 | 0.001325976 |
| CTLA4 | 0.000689389 | 0.000689389 |
| CTNNB1 | 0.001838283 | 0.001838283 |
| CTRB1 | 6.92E-05 | 6.92E-05 |
| CTSD | 0.000115685 | 0.000115685 |
| CXCL1 | 0.000530072 | 0.000530072 |
| CXCL10 | 0.000664773 | 0.000664773 |
| CXCL12 | 0.000966192 | 0.000966192 |
| CXCL2 | 0.00052857 | 0.00052857 |
| CXCL5 | 0.000300164 | 0.000300164 |
| CXCL8 | 0.001321589 | 0.001321589 |
| CXCL9 | 0.000261088 | 0.000261088 |
| CXCR1 | 8.54E-05 | 8.54E-05 |
| CXCR2 | 0.00010364 | 0.00010364 |
| CXCR3 | 0.000123696 | 0.000123696 |
| CXCR4 | 0.000962524 | 0.000962524 |
| CYBA | 0.000621502 | 0.000621502 |
| CYBB | 0.000573359 | 0.000573359 |
| CYCS | 0.000548702 | 0.000548702 |
| CYP1A1 | 0.036875219 | 0.036875219 |
| CYP1B1 | 0.001595627 | 0.001595627 |
| CYP2C9 | 0.002995997 | 0.002995997 |
| CYP3A4 | 0.001283414 | 0.001283414 |
| DEFB4A | 2.53E-05 | 2.53E-05 |
| DHFR | 3.98E-05 | 3.98E-05 |
| DHPS | 2.90E-05 | 2.90E-05 |
| DKC1 | 7.98E-05 | 7.98E-05 |
| DNAAF2 | 0 | 0 |
| DNAH11 | 0 | 0 |
| DNAI2 | 0 | 0 |
| DOCK8 | 3.30E-05 | 3.30E-05 |
| DPP4 | 0.000550372 | 0.000550372 |
| DRC1 | 0 | 0 |
| DSP | 0.000750765 | 0.000750765 |
| DUOX2 | 7.97E-05 | 7.97E-05 |
| EDN1 | 0.001477152 | 0.001477152 |
| EGF | 0.001334917 | 0.001334917 |
| EGFR | 0.038025127 | 0.038025127 |
| EIF6 | 0 | 0 |
| ELANE | 0.000159356 | 0.000159356 |
| ELK1 | 9.73E-05 | 9.73E-05 |
| ELN | 0.00062154 | 0.00062154 |
| EPHB2 | 0.000121059 | 0.000121059 |
| ERBB2 | 0.001558838 | 0.001558838 |
| ERBB3 | 0.00078116 | 0.00078116 |
| ERF | 4.10E-05 | 4.10E-05 |
| ESR1 | 0.001530948 | 0.001530948 |
| ESR2 | 0.000855709 | 0.000855709 |
| F10 | 0.000888689 | 0.000888689 |
| F2 | 0.037404492 | 0.037404492 |
| F3 | 0.002081504 | 0.002081504 |
| F7 | 0.000190074 | 0.000190074 |
| FARSA | 0 | 0 |
| FARSB | 0 | 0 |
| FAS | 0.001647783 | 0.001647783 |
| FASLG | 0.000460597 | 0.000460597 |
| FASN | 0.00274728 | 0.00274728 |
| FBN1 | 0.001619362 | 0.001619362 |
| FCGR2A | 0.000512758 | 0.000512758 |
| FGF2 | 0.001042947 | 0.001042947 |
| FGF7 | 0.000397956 | 0.000397956 |
| FGF8 | 0.000380738 | 0.000380738 |
| FN1 | 0.002429141 | 0.002429141 |
| FOS | 0.001371759 | 0.001371759 |
| FOSL1 | 8.84E-05 | 8.84E-05 |
| FOXE1 | 5.81E-06 | 5.81E-06 |
| FOXP3 | 0.000859756 | 0.000859756 |
| GAPDH | 0.001429276 | 0.001429276 |
| GAS8 | 0 | 0 |
| GBA | 1.00E-05 | 1.00E-05 |
| GIG25 | 4.30E-05 | 4.30E-05 |
| GPR29 | 9.60E-05 | 9.60E-05 |
| GPT | 0.001566722 | 0.001566722 |
| GREM1 | 1.03E-05 | 1.03E-05 |
| GRIA2 | 8.92E-05 | 8.92E-05 |
| GRM5 | 4.86E-05 | 4.86E-05 |
| GRP | 6.62E-05 | 6.62E-05 |
| GSK3B | 0.002245094 | 0.002245094 |
| GSN | 0.00065943 | 0.00065943 |
| GSTM1 | 0.001539036 | 0.001539036 |
| GSTM2 | 0.001492964 | 0.001492964 |
| HGF | 0.000919831 | 0.000919831 |
| HIF1A | 0.03755063 | 0.03755063 |
| HIST2H2AA | 2.44E-05 | 2.44E-05 |
| HK2 | 0.000725069 | 0.000725069 |
| HLA-A | 6.02E-05 | 6.02E-05 |
| HLA-B | 2.43E-05 | 2.43E-05 |
| HLA-DPB1 | 2.75E-05 | 2.75E-05 |
| HLA-DQA1 | 4.65E-05 | 4.65E-05 |
| HLA-DQB1 | 4.64E-05 | 4.64E-05 |
| HLA-DRB1 | 7.20E-05 | 7.20E-05 |
| HMGB1 | 0.000711015 | 0.000711015 |
| HMOX1 | 0.001095413 | 0.001095413 |
| HP | 0.00095699 | 0.00095699 |
| HRH2 | 1.31E-05 | 1.31E-05 |
| HSF1 | 0.000180286 | 0.000180286 |
| HSP90AA1 | 0.001763567 | 0.001763567 |
| HSPB1 | 0.000760287 | 0.000760287 |
| HSPD1 | 0.000442182 | 0.000442182 |
| ICAM1 | 0.037855506 | 0.037855506 |
| ICOS | 4.62E-05 | 4.62E-05 |
| IFIH1 | 9.06E-05 | 9.06E-05 |
| IFNB1 | 0.000476914 | 0.000476914 |
| IFNG | 0.000746959 | 0.000746959 |
| IGF1 | 0.001784159 | 0.001784159 |
| IGF2 | 0.001658827 | 0.001658827 |
| IGFBP3 | 0.038223865 | 0.038223865 |
| IKBKB | 0.001305821 | 0.001305821 |
| IL10 | 0.001276832 | 0.001276832 |
| IL13 | 0.00129881 | 0.00129881 |
| IL13RA2 | 0.000350896 | 0.000350896 |
| IL17A | 0.000778186 | 0.000778186 |
| IL18 | 0.001213652 | 0.001213652 |
| IL1A | 0.000536818 | 0.000536818 |
| IL1B | 0.001640198 | 0.001640198 |
| IL1R1 | 0.000659218 | 0.000659218 |
| IL1RN | 0.000343765 | 0.000343765 |
| IL2 | 0.000884855 | 0.000884855 |
| IL21R | 0.000326312 | 0.000326312 |
| IL2RA | 0.000312262 | 0.000312262 |
| IL2RG | 0.000296097 | 0.000296097 |
| IL3 | 0.000476788 | 0.000476788 |
| IL33 | 0.000295552 | 0.000295552 |
| IL4 | 0.001228851 | 0.001228851 |
| IL5 | 0.000426118 | 0.000426118 |
| IL6 | 0.03800198 | 0.03800198 |
| IL7R | 0.000283133 | 0.000283133 |
| IL9 | 0.000293772 | 0.000293772 |
| INPP5E | 5.94E-05 | 5.94E-05 |
| INS | 0.002101092 | 0.002101092 |
| INVS | 2.83E-05 | 2.83E-05 |
| IRAK4 | 0.000100603 | 0.000100603 |
| IRF1 | 0.000164108 | 0.000164108 |
| IRF5 | 0.000104646 | 0.000104646 |
| IRF6 | 8.98E-05 | 8.98E-05 |
| IRF8 | 4.98E-05 | 4.98E-05 |
| ITGA3 | 0.000493434 | 0.000493434 |
| ITGA4 | 0.000810269 | 0.000810269 |
| ITGAL | 0.001004552 | 0.001004552 |
| ITGAM | 0.000776575 | 0.000776575 |
| ITGB2 | 0.00098158 | 0.00098158 |
| JUN | 0.001303601 | 0.001303601 |
| KIT | 0.000224491 | 0.000224491 |
| KMT2D | 0.000139259 | 0.000139259 |
| KNG1 | 0.000507587 | 0.000507587 |
| KRAS | 0.000834242 | 0.000834242 |
| KRT18 | 0.00010177 | 0.00010177 |
| LAMC2 | 0.000788279 | 0.000788279 |
| LBP | 0.001122919 | 0.001122919 |
| LDLR | 0.001339552 | 0.001339552 |
| LGALS3 | 0.001047609 | 0.001047609 |
| LIG4 | 6.24E-05 | 6.24E-05 |
| LRBA | 2.27E-05 | 2.27E-05 |
| LTA | 0.00055594 | 0.00055594 |
| LTF | 5.37E-06 | 5.37E-06 |
| LYZ | 2.90E-05 | 2.90E-05 |
| MALT1 | 0.000120788 | 0.000120788 |
| MAPK10 | 0.000168118 | 0.000168118 |
| MAPK3 | 0.001391782 | 0.001391782 |
| MAPK8 | 0.000961675 | 0.000961675 |
| MARS | 0 | 0 |
| MBL2 | 0.00064569 | 0.00064569 |
| MCL1 | 0.001181107 | 0.001181107 |
| MDM2 | 0.002311043 | 0.002311043 |
| MIF | 0.000103986 | 0.000103986 |
| MMP1 | 0.001455361 | 0.001455361 |
| MMP12 | 0.000923522 | 0.000923522 |
| MMP2 | 0.002108126 | 0.002108126 |
| MMP3 | 0.001004117 | 0.001004117 |
| MMP7 | 0.00066112 | 0.00066112 |
| MMP8 | 0.000881336 | 0.000881336 |
| MMP9 | 0.001737694 | 0.001737694 |
| MPO | 0.00096074 | 0.00096074 |
| MRC1 | 0.00029993 | 0.00029993 |
| MSX1 | 5.65E-05 | 5.65E-05 |
| MTMR10 | 2.74E-06 | 2.74E-06 |
| MTOR | 0.001642746 | 0.001642746 |
| MTTP | 0.001390672 | 0.001390672 |
| MUC1 | 0.037839274 | 0.037839274 |
| MUC5AC | 0.001183947 | 0.001183947 |
| MUC5B | 0.001510623 | 0.001510623 |
| MYC | 0.001151515 | 0.001151515 |
| MYD88 | 0.000319618 | 0.000319618 |
| NCF1 | 0.000926955 | 0.000926955 |
| NCF2 | 0.000564761 | 0.000564761 |
| NCOA1 | 0.001556113 | 0.001556113 |
| NCOA2 | 0.001400046 | 0.001400046 |
| NDNL2 | 3.29E-05 | 3.29E-05 |
| NEU1 | 3.89E-05 | 3.89E-05 |
| NFE2L2 | 0.000570574 | 0.000570574 |
| NFKB1 | 0.000653646 | 0.000653646 |
| NFKBIA | 0.000774066 | 0.000774066 |
| NGF | 0.00072386 | 0.00072386 |
| NHP2 | 1.01E-05 | 1.01E-05 |
| NKX2-1 | 6.95E-05 | 6.95E-05 |
| NOD2 | 0.000117277 | 0.000117277 |
| NOP10 | 1.07E-05 | 1.07E-05 |
| NOS1 | 0.000158972 | 0.000158972 |
| NOS3 | 0.001482353 | 0.001482353 |
| NOX5 | 0.000108657 | 0.000108657 |
| NPC1 | 0.001295037 | 0.001295037 |
| NPC2 | 0.000214041 | 0.000214041 |
| NPHP1 | 6.17E-06 | 6.17E-06 |
| NPHP3 | 7.19E-06 | 7.19E-06 |
| NQO1 | 0.002564902 | 0.002564902 |
| NR1I3 | 0.000267714 | 0.000267714 |
| NR3C1 | 0.000904857 | 0.000904857 |
| NR3C2 | 0.000138902 | 0.000138902 |
| NUF2 | 0.000111319 | 0.000111319 |
| OBFC1 | 4.20E-05 | 4.20E-05 |
| OFD1 | 3.36E-06 | 3.36E-06 |
| OLR1 | 0.000955258 | 0.000955258 |
| PAFAH1B1 | 4.88E-05 | 4.88E-05 |
| PARN | 2.14E-05 | 2.14E-05 |
| PARP1 | 0.000812456 | 0.000812456 |
| PCNA | 0.000641934 | 0.000641934 |
| PDGFA | 0.00040241 | 0.00040241 |
| PDGFB | 0.000663608 | 0.000663608 |
| PDGFRA | 0.000919681 | 0.000919681 |
| PGR | 0.000778523 | 0.000778523 |
| PIK3C2A | 0.000125939 | 0.000125939 |
| PIK3CD | 0.000383834 | 0.000383834 |
| PKD1 | 7.83E-05 | 7.83E-05 |
| PKHD1 | 9.83E-06 | 9.83E-06 |
| PLA2G6 | 0.002332392 | 0.002332392 |
| PLAT | 0.000771142 | 0.000771142 |
| PLAU | 0.001431954 | 0.001431954 |
| PLCG2 | 0.000692488 | 0.000692488 |
| PON1 | 0.000151743 | 0.000151743 |
| POSTN | 0.001462832 | 0.001462832 |
| PPARG | 0.038169866 | 0.038169866 |
| PRKACA | 0.000259998 | 0.000259998 |
| PRKCA | 0.00098139 | 0.00098139 |
| PRL | 0.000443073 | 0.000443073 |
| PRSS1 | 0.000167431 | 0.000167431 |
| PRTN3 | 0.00055639 | 0.00055639 |
| PSMD3 | 0.00071455 | 0.00071455 |
| PTCH1 | 6.99E-05 | 6.99E-05 |
| PTEN | 0.001302815 | 0.001302815 |
| PTGS1 | 0.002546503 | 0.002546503 |
| PTPRC | 0.0006506 | 0.0006506 |
| PVRL1 | 8.62E-05 | 8.62E-05 |
| RAC1 | 0.000700734 | 0.000700734 |
| RAC2 | 0.000146163 | 0.000146163 |
| RAF1 | 0.001007774 | 0.001007774 |
| RAG1 | 4.43E-05 | 4.43E-05 |
| RASA1 | 0.000458012 | 0.000458012 |
| RASSF1 | 0.000998045 | 0.000998045 |
| RB1 | 0.001282232 | 0.001282232 |
| RELA | 0.001804735 | 0.001804735 |
| REN | 0.000711642 | 0.000711642 |
| RNASE3 | 4.75E-05 | 4.75E-05 |
| RNF168 | 2.93E-05 | 2.93E-05 |
| RTEL1 | 2.11E-05 | 2.11E-05 |
| RUNX1T1 | 4.44E-05 | 4.44E-05 |
| RUNX2 | 0.001121919 | 0.001121919 |
| S100A1 | 8.38E-05 | 8.38E-05 |
| S100A12 | 8.33E-05 | 8.33E-05 |
| SCGB1A1 | 6.03E-05 | 6.03E-05 |
| SELE | 0.038460566 | 0.038460566 |
| SELL | 0.000636523 | 0.000636523 |
| SERPINA1 | 0.000931473 | 0.000931473 |
| SERPINB1 | 4.14E-05 | 4.14E-05 |
| SERPINE1 | 0.001716013 | 0.001716013 |
| SERPINH1 | 0.001353369 | 0.001353369 |
| SFTPA1 | 4.53E-05 | 4.53E-05 |
| SFTPA2 | 3.36E-05 | 3.36E-05 |
| SFTPB | 4.32E-05 | 4.32E-05 |
| SFTPC | 6.38E-05 | 6.38E-05 |
| SFTPD | 0.000895014 | 0.000895014 |
| SHH | 0.00068072 | 0.00068072 |
| SLPI | 3.42E-05 | 3.42E-05 |
| SMAD2 | 0.001144099 | 0.001144099 |
| SMAD4 | 0.000867665 | 0.000867665 |
| SMPD1 | 0.000133317 | 0.000133317 |
| SOD3 | 9.28E-05 | 9.28E-05 |
| SPARC | 0.001203017 | 0.001203017 |
| SPP1 | 0.000554462 | 0.000554462 |
| SREBF1 | 0.037635945 | 0.037635945 |
| SSB | 7.96E-06 | 7.96E-06 |
| STAT3 | 0.001909491 | 0.001909491 |
| STAT5B | 0.000798552 | 0.000798552 |
| STAT6 | 0.000694983 | 0.000694983 |
| TAC1 | 0.000118749 | 0.000118749 |
| TEP1 | 5.94E-05 | 5.94E-05 |
| TERF1 | 2.15E-05 | 2.15E-05 |
| TERT | 0.000179036 | 0.000179036 |
| TGFB1 | 0.001382747 | 0.001382747 |
| TGFB2 | 0.000172093 | 0.000172093 |
| TGFB3 | 0.000636969 | 0.000636969 |
| TGIF1 | 0.000108185 | 0.000108185 |
| THBD | 0.001715755 | 0.001715755 |
| THBS1 | 0.000637401 | 0.000637401 |
| TIMP1 | 0.036776494 | 0.036776494 |
| TINF2 | 9.51E-06 | 9.51E-06 |
| TLR2 | 0.000494644 | 0.000494644 |
| TLR3 | 0.000321244 | 0.000321244 |
| TLR4 | 0.000847541 | 0.000847541 |
| TLR5 | 0.000880367 | 0.000880367 |
| TLR9 | 0.000307566 | 0.000307566 |
| TMEM173 | 2.94E-05 | 2.94E-05 |
| TMEM67 | 2.24E-06 | 2.24E-06 |
| TNF | 0.001865567 | 0.001865567 |
| TNFRSF13B | 1.73E-05 | 1.73E-05 |
| TNFRSF13C | 5.79E-05 | 5.79E-05 |
| TNNI3 | 0.000688508 | 0.000688508 |
| TOLLIP | 7.33E-05 | 7.33E-05 |
| TP53 | 0.002664456 | 0.002664456 |
| TP63 | 0.036596376 | 0.036596376 |
| TREM1 | 5.81E-05 | 5.81E-05 |
| TRIM21 | 6.48E-05 | 6.48E-05 |
| TRPV1 | 3.74E-05 | 3.74E-05 |
| TTC21B | 0 | 0 |
| UMOD | 5.71E-05 | 5.71E-05 |
| UNC119 | 2.98E-05 | 2.98E-05 |
| VCAM1 | 0.037610377 | 0.037610377 |
| VEGFA | 0.001859454 | 0.001859454 |
| VIM | 0.000587952 | 0.000587952 |
| VTN | 0.001029492 | 0.001029492 |
| WDR19 | 0 | 0 |
| ZAP70 | 0.00082442 | 0.00082442 |
